# Supplementary material
Source: publisher figshare collection journal article supplement (https://acs.figshare.com/ndownloader/files/5456693)
Supplement: Supplementary file 1 [file 5456693]

HELIX    1   1 ALA A    9  ASN A   20  1                                  12
HELIX    2   2 LYS A   26  ILE A   49  1                                  24
HELIX    3   3 THR A   52  LEU A   55  1                                   4
HELIX    4   4 LYS A   85  THR A   94  1                                  10
HELIX    5   5 SER A   98  SER A  110  1                                  13
HELIX    6   6 ILE A  113  GLN A  118  1                                   6
HELIX    7   7 GLY A  122  LEU A  128  1                                   7
HELIX    8   8 LEU A  181  LEU A  184  1                                   4
HELIX    9   9 GLU A  186  HIS A  196  1                                  11
SHEET    1   1 1 GLU A   3  ALA A   6  0
SHEET    2   2 1 ILE A  63  ASP A  68  0
SHEET    3   3 1 THR A  73  ASP A  78  0
SHEET    4   4 1 ALA A 130  LYS A 138  0
SHEET    5   5 1 TYR A 145  SER A 149  0
SHEET    6   6 1 SER A 154  LYS A 159  0
SHEET    7   7 1 GLY A 169  LEU A 176  0
SHEET    8   8 1 ILE A 204  LEU A 206  0
MODEL        1
ATOM      1  N   SER A   1      95.392 -22.516  13.032  1.00  0.00           N
ATOM      2  CA  SER A   1      95.459 -23.290  14.266  1.00  0.00           C
ATOM      3  C   SER A   1      94.195 -23.130  15.115  1.00  0.00           C
ATOM      4  O   SER A   1      93.515 -22.106  15.060  1.00  0.00           O
ATOM      5  CB  SER A   1      96.697 -22.905  15.080  1.00  0.00           C
ATOM      6  OG  SER A   1      96.647 -21.543  15.460  1.00  0.00           O
ATOM      7  HA  SER A   1      95.548 -24.339  13.989  1.00  0.00           H
ATOM      8  HB2 SER A   1      96.745 -23.527  15.975  1.00  0.00           H
ATOM      9  HB3 SER A   1      97.592 -23.080  14.482  1.00  0.00           H
ATOM     10  HG  SER A   1      96.928 -21.450  16.374  1.00  0.00           H
ATOM     11  H   SER A   1      95.561 -21.521  13.118  1.00  0.00           H
ATOM     12  N   THR A   2      93.906 -24.149  15.916  1.00  0.00           N
ATOM     13  CA  THR A   2      92.667 -24.222  16.683  1.00  0.00           C
ATOM     14  C   THR A   2      92.615 -23.276  17.879  1.00  0.00           C
ATOM     15  O   THR A   2      93.589 -23.136  18.615  1.00  0.00           O
ATOM     16  CB  THR A   2      92.443 -25.652  17.202  1.00  0.00           C
ATOM     17  OG1 THR A   2      92.295 -26.546  16.093  1.00  0.00           O
ATOM     18  CG2 THR A   2      91.205 -25.718  18.080  1.00  0.00           C
ATOM     19  H   THR A   2      94.548 -24.920  15.974  1.00  0.00           H
ATOM     20  HA  THR A   2      91.832 -23.973  16.024  1.00  0.00           H
ATOM     21  HB  THR A   2      93.308 -25.966  17.789  1.00  0.00           H
ATOM     22  HG1 THR A   2      92.932 -26.316  15.418  1.00  0.00           H
ATOM     23 HG21 THR A   2      90.897 -26.758  18.187  1.00  0.00           H
ATOM     24 HG22 THR A   2      91.396 -25.300  19.067  1.00  0.00           H
ATOM     25 HG23 THR A   2      90.431 -25.153  17.567  1.00  0.00           H
ATOM     26  N   GLU A   3      91.465 -22.637  18.072  1.00  0.00           N
ATOM     27  CA  GLU A   3      91.207 -21.878  19.289  1.00  0.00           C
ATOM     28  C   GLU A   3      90.072 -22.526  20.074  1.00  0.00           C
ATOM     29  O   GLU A   3      89.081 -22.967  19.496  1.00  0.00           O
ATOM     30  CB  GLU A   3      90.860 -20.430  18.969  1.00  0.00           C
ATOM     31  CG  GLU A   3      91.987 -19.665  18.314  1.00  0.00           C
ATOM     32  CD  GLU A   3      91.721 -18.173  18.255  1.00  0.00           C
ATOM     33  OE1 GLU A   3      90.807 -17.759  17.508  1.00  0.00           O
ATOM     34  OE2 GLU A   3      92.429 -17.417  18.957  1.00  0.00           O
ATOM     35  H   GLU A   3      90.717 -22.715  17.387  1.00  0.00           H
ATOM     36  HA  GLU A   3      92.092 -21.865  19.925  1.00  0.00           H
ATOM     37  HB2 GLU A   3      89.992 -20.404  18.310  1.00  0.00           H
ATOM     38  HB3 GLU A   3      90.602 -19.929  19.904  1.00  0.00           H
ATOM     39  HG2 GLU A   3      92.140 -20.043  17.301  1.00  0.00           H
ATOM     40  HG3 GLU A   3      92.905 -19.846  18.879  1.00  0.00           H
ATOM     41  N   THR A   4      90.222 -22.580  21.391  1.00  0.00           N
ATOM     42  CA  THR A   4      89.238 -23.229  22.250  1.00  0.00           C
ATOM     43  C   THR A   4      88.413 -22.195  23.002  1.00  0.00           C
ATOM     44  O   THR A   4      88.940 -21.194  23.478  1.00  0.00           O
ATOM     45  CB  THR A   4      89.915 -24.179  23.257  1.00  0.00           C
ATOM     46  OG1 THR A   4      90.670 -25.169  22.550  1.00  0.00           O
ATOM     47  CG2 THR A   4      88.875 -24.874  24.136  1.00  0.00           C
ATOM     48  H   THR A   4      90.970 -22.058  21.822  1.00  0.00           H
ATOM     49  HA  THR A   4      88.554 -23.828  21.649  1.00  0.00           H
ATOM     50  HB  THR A   4      90.595 -23.608  23.891  1.00  0.00           H
ATOM     51 HG21 THR A   4      89.374 -25.635  24.736  1.00  0.00           H
ATOM     52 HG22 THR A   4      88.124 -25.358  23.509  1.00  0.00           H
ATOM     53 HG23 THR A   4      88.398 -24.164  24.810  1.00  0.00           H
ATOM     54  HG1 THR A   4      90.976 -24.767  21.732  1.00  0.00           H
ATOM     55  N   PHE A   5      87.114 -22.442  23.108  1.00  0.00           N
ATOM     56  CA  PHE A   5      86.222 -21.513  23.789  1.00  0.00           C
ATOM     57  C   PHE A   5      85.343 -22.243  24.789  1.00  0.00           C
ATOM     58  O   PHE A   5      84.977 -23.400  24.582  1.00  0.00           O
ATOM     59  CB  PHE A   5      85.373 -20.750  22.768  1.00  0.00           C
ATOM     60  CG  PHE A   5      86.195 -20.021  21.744  1.00  0.00           C
ATOM     61  CD1 PHE A   5      86.647 -20.675  20.609  1.00  0.00           C
ATOM     62  CD2 PHE A   5      86.548 -18.697  21.935  1.00  0.00           C
ATOM     63  CE1 PHE A   5      87.420 -20.019  19.678  1.00  0.00           C
ATOM     64  CE2 PHE A   5      87.326 -18.033  21.004  1.00  0.00           C
ATOM     65  CZ  PHE A   5      87.760 -18.695  19.875  1.00  0.00           C
ATOM     66  H   PHE A   5      86.708 -23.241  22.636  1.00  0.00           H
ATOM     67  HA  PHE A   5      86.803 -20.775  24.342  1.00  0.00           H
ATOM     68  HB2 PHE A   5      84.725 -20.042  23.286  1.00  0.00           H
ATOM     69  HB3 PHE A   5      84.740 -21.470  22.253  1.00  0.00           H
ATOM     70  HD1 PHE A   5      86.388 -21.712  20.444  1.00  0.00           H
ATOM     71  HD2 PHE A   5      86.214 -18.172  22.817  1.00  0.00           H
ATOM     72  HE1 PHE A   5      87.771 -20.547  18.805  1.00  0.00           H
ATOM     73  HE2 PHE A   5      87.600 -16.999  21.158  1.00  0.00           H
ATOM     74  HZ  PHE A   5      88.382 -18.185  19.150  1.00  0.00           H
ATOM     75  N   ALA A   6      85.020 -21.564  25.883  1.00  0.00           N
ATOM     76  CA  ALA A   6      84.163 -22.137  26.910  1.00  0.00           C
ATOM     77  C   ALA A   6      82.717 -21.758  26.640  1.00  0.00           C
ATOM     78  O   ALA A   6      82.423 -20.599  26.346  1.00  0.00           O
ATOM     79  CB  ALA A   6      84.588 -21.654  28.284  1.00  0.00           C
ATOM     80  H   ALA A   6      85.262 -20.588  25.946  1.00  0.00           H
ATOM     81  HA  ALA A   6      84.248 -23.225  26.898  1.00  0.00           H
ATOM     82  HB1 ALA A   6      83.944 -22.101  29.042  1.00  0.00           H
ATOM     83  HB2 ALA A   6      84.504 -20.567  28.340  1.00  0.00           H
ATOM     84  HB3 ALA A   6      85.621 -21.949  28.474  1.00  0.00           H
ATOM     85  N   PHE A   7      81.820 -22.737  26.724  1.00  0.00           N
ATOM     86  CA  PHE A   7      80.397 -22.461  26.598  1.00  0.00           C
ATOM     87  C   PHE A   7      79.979 -21.544  27.734  1.00  0.00           C
ATOM     88  O   PHE A   7      80.399 -21.732  28.872  1.00  0.00           O
ATOM     89  CB  PHE A   7      79.570 -23.752  26.668  1.00  0.00           C
ATOM     90  CG  PHE A   7      79.502 -24.514  25.365  1.00  0.00           C
ATOM     91  CD1 PHE A   7      80.082 -25.772  25.248  1.00  0.00           C
ATOM     92  CD2 PHE A   7      78.856 -23.971  24.259  1.00  0.00           C
ATOM     93  CE1 PHE A   7      80.021 -26.475  24.057  1.00  0.00           C
ATOM     94  CE2 PHE A   7      78.786 -24.671  23.064  1.00  0.00           C
ATOM     95  CZ  PHE A   7      79.369 -25.928  22.964  1.00  0.00           C
ATOM     96  H   PHE A   7      82.125 -23.669  26.978  1.00  0.00           H
ATOM     97  HA  PHE A   7      80.204 -21.954  25.651  1.00  0.00           H
ATOM     98  HB2 PHE A   7      78.543 -23.494  26.935  1.00  0.00           H
ATOM     99  HB3 PHE A   7      79.957 -24.392  27.462  1.00  0.00           H
ATOM    100  HD1 PHE A   7      80.556 -26.223  26.098  1.00  0.00           H
ATOM    101  HD2 PHE A   7      78.388 -23.005  24.345  1.00  0.00           H
ATOM    102  HE1 PHE A   7      80.450 -27.460  23.999  1.00  0.00           H
ATOM    103  HE2 PHE A   7      78.293 -24.238  22.204  1.00  0.00           H
ATOM    104  HZ  PHE A   7      79.313 -26.482  22.036  1.00  0.00           H
ATOM    105  N   ASN A   8      79.156 -20.551  27.432  1.00  0.00           N
ATOM    106  CA  ASN A   8      78.511 -19.800  28.489  1.00  0.00           C
ATOM    107  C   ASN A   8      77.845 -20.780  29.459  1.00  0.00           C
ATOM    108  O   ASN A   8      77.309 -21.812  29.038  1.00  0.00           O
ATOM    109  CB  ASN A   8      77.484 -18.833  27.908  1.00  0.00           C
ATOM    110  CG  ASN A   8      76.606 -18.214  28.974  1.00  0.00           C
ATOM    111  OD1 ASN A   8      76.941 -17.181  29.551  1.00  0.00           O
ATOM    112  ND2 ASN A   8      75.477 -18.853  29.251  1.00  0.00           N
ATOM    113  H   ASN A   8      78.826 -20.441  26.478  1.00  0.00           H
ATOM    114  HA  ASN A   8      79.267 -19.228  29.030  1.00  0.00           H
ATOM    115  HB2 ASN A   8      76.858 -19.345  27.177  1.00  0.00           H
ATOM    116  HB3 ASN A   8      78.008 -18.033  27.402  1.00  0.00           H
ATOM    117 HD21 ASN A   8      74.855 -18.368  29.890  1.00  0.00           H
ATOM    118 HD22 ASN A   8      75.127 -19.527  28.596  1.00  0.00           H
ATOM    119  N   ALA A   9      77.887 -20.462  30.751  1.00  0.00           N
ATOM    120  CA  ALA A   9      77.384 -21.363  31.789  1.00  0.00           C
ATOM    121  C   ALA A   9      75.933 -21.793  31.569  1.00  0.00           C
ATOM    122  O   ALA A   9      75.594 -22.960  31.749  1.00  0.00           O
ATOM    123  CB  ALA A   9      77.549 -20.731  33.166  1.00  0.00           C
ATOM    124  H   ALA A   9      78.301 -19.584  31.025  1.00  0.00           H
ATOM    125  HA  ALA A   9      77.985 -22.272  31.760  1.00  0.00           H
ATOM    126  HB1 ALA A   9      77.193 -21.423  33.932  1.00  0.00           H
ATOM    127  HB2 ALA A   9      78.598 -20.499  33.348  1.00  0.00           H
ATOM    128  HB3 ALA A   9      76.962 -19.812  33.228  1.00  0.00           H
ATOM    129  N   ASP A  10      75.082 -20.848  31.182  1.00  0.00           N
ATOM    130  CA  ASP A  10      73.682 -21.151  30.917  1.00  0.00           C
ATOM    131  C   ASP A  10      73.540 -22.094  29.735  1.00  0.00           C
ATOM    132  O   ASP A  10      72.692 -22.983  29.736  1.00  0.00           O
ATOM    133  CB  ASP A  10      72.894 -19.872  30.645  1.00  0.00           C
ATOM    134  CG  ASP A  10      72.619 -19.079  31.904  1.00  0.00           C
ATOM    135  OD1 ASP A  10      71.765 -19.514  32.708  1.00  0.00           O
ATOM    136  OD2 ASP A  10      73.254 -18.020  32.085  1.00  0.00           O
ATOM    137  H   ASP A  10      75.394 -19.890  31.117  1.00  0.00           H
ATOM    138  HA  ASP A  10      73.241 -21.643  31.788  1.00  0.00           H
ATOM    139  HB2 ASP A  10      73.275 -19.251  29.858  1.00  0.00           H
ATOM    140  HB3 ASP A  10      71.916 -20.185  30.273  1.00  0.00           H
ATOM    141  N   ILE A  11      74.367 -21.891  28.719  1.00  0.00           N
ATOM    142  CA  ILE A  11      74.327 -22.759  27.553  1.00  0.00           C
ATOM    143  C   ILE A  11      74.848 -24.146  27.919  1.00  0.00           C
ATOM    144  O   ILE A  11      74.333 -25.159  27.445  1.00  0.00           O
ATOM    145  CB  ILE A  11      75.087 -22.151  26.360  1.00  0.00           C
ATOM    146  CG1 ILE A  11      74.266 -21.002  25.766  1.00  0.00           C
ATOM    147  CG2 ILE A  11      75.347 -23.205  25.294  1.00  0.00           C
ATOM    148  CD1 ILE A  11      74.861 -20.392  24.523  1.00  0.00           C
ATOM    149  H   ILE A  11      75.179 -21.315  28.873  1.00  0.00           H
ATOM    150  HA  ILE A  11      73.287 -22.898  27.249  1.00  0.00           H
ATOM    151  HB  ILE A  11      76.052 -21.768  26.696  1.00  0.00           H
ATOM    152 HG12 ILE A  11      74.153 -20.220  26.512  1.00  0.00           H
ATOM    153 HG13 ILE A  11      73.271 -21.372  25.510  1.00  0.00           H
ATOM    154 HD11 ILE A  11      74.145 -19.669  24.138  1.00  0.00           H
ATOM    155 HD12 ILE A  11      75.027 -21.108  23.732  1.00  0.00           H
ATOM    156 HD13 ILE A  11      75.767 -19.855  24.771  1.00  0.00           H
ATOM    157 HG21 ILE A  11      75.933 -24.039  25.677  1.00  0.00           H
ATOM    158 HG22 ILE A  11      75.951 -22.809  24.483  1.00  0.00           H
ATOM    159 HG23 ILE A  11      74.406 -23.585  24.890  1.00  0.00           H
ATOM    160  N   ARG A  12      75.850 -24.184  28.791  1.00  0.00           N
ATOM    161  CA  ARG A  12      76.379 -25.449  29.271  1.00  0.00           C
ATOM    162  C   ARG A  12      75.300 -26.227  30.020  1.00  0.00           C
ATOM    163  O   ARG A  12      75.168 -27.440  29.859  1.00  0.00           O
ATOM    164  CB  ARG A  12      77.589 -25.227  30.177  1.00  0.00           C
ATOM    165  CG  ARG A  12      78.274 -26.522  30.577  1.00  0.00           C
ATOM    166  CD  ARG A  12      79.514 -26.252  31.396  1.00  0.00           C
ATOM    167  NE  ARG A  12      79.193 -25.606  32.662  1.00  0.00           N
ATOM    168  CZ  ARG A  12      79.857 -24.569  33.157  1.00  0.00           C
ATOM    169  NH1 ARG A  12      80.878 -24.055  32.485  1.00  0.00           N
ATOM    170  NH2 ARG A  12      79.496 -24.046  34.320  1.00  0.00           N
ATOM    171  H   ARG A  12      76.270 -23.310  29.085  1.00  0.00           H
ATOM    172  HA  ARG A  12      76.668 -26.057  28.409  1.00  0.00           H
ATOM    173  HB2 ARG A  12      77.275 -24.691  31.070  1.00  0.00           H
ATOM    174  HB3 ARG A  12      78.308 -24.603  29.641  1.00  0.00           H
ATOM    175  HG2 ARG A  12      78.560 -27.068  29.676  1.00  0.00           H
ATOM    176  HG3 ARG A  12      77.593 -27.146  31.158  1.00  0.00           H
ATOM    177  HD2 ARG A  12      80.001 -27.208  31.602  1.00  0.00           H
ATOM    178  HD3 ARG A  12      80.191 -25.663  30.777  1.00  0.00           H
ATOM    179  HE  ARG A  12      78.407 -25.963  33.181  1.00  0.00           H
ATOM    180 HH11 ARG A  12      81.346 -23.231  32.811  1.00  0.00           H
ATOM    181 HH12 ARG A  12      81.085 -24.403  31.565  1.00  0.00           H
ATOM    182 HH21 ARG A  12      78.667 -24.382  34.784  1.00  0.00           H
ATOM    183 HH22 ARG A  12      79.974 -23.242  34.680  1.00  0.00           H
ATOM    184  N   GLN A  13      74.520 -25.525  30.831  1.00  0.00           N
ATOM    185  CA  GLN A  13      73.430 -26.166  31.549  1.00  0.00           C
ATOM    186  C   GLN A  13      72.331 -26.656  30.598  1.00  0.00           C
ATOM    187  O   GLN A  13      71.772 -27.735  30.791  1.00  0.00           O
ATOM    188  CB  GLN A  13      72.873 -25.235  32.624  1.00  0.00           C
ATOM    189  CG  GLN A  13      73.793 -25.112  33.834  1.00  0.00           C
ATOM    190  CD  GLN A  13      73.506 -23.880  34.672  1.00  0.00           C
ATOM    191  OE1 GLN A  13      74.351 -23.441  35.453  1.00  0.00           O
ATOM    192  NE2 GLN A  13      72.314 -23.309  34.507  1.00  0.00           N
ATOM    193  H   GLN A  13      74.666 -24.526  30.926  1.00  0.00           H
ATOM    194  HA  GLN A  13      73.814 -27.054  32.052  1.00  0.00           H
ATOM    195  HB2 GLN A  13      72.719 -24.258  32.162  1.00  0.00           H
ATOM    196  HB3 GLN A  13      71.906 -25.614  32.961  1.00  0.00           H
ATOM    197  HG2 GLN A  13      74.828 -25.046  33.500  1.00  0.00           H
ATOM    198  HG3 GLN A  13      73.680 -25.999  34.458  1.00  0.00           H
ATOM    199 HE21 GLN A  13      71.626 -23.691  33.881  1.00  0.00           H
ATOM    200 HE22 GLN A  13      72.150 -22.432  34.973  1.00  0.00           H
ATOM    201  N   LEU A  14      72.034 -25.873  29.567  1.00  0.00           N
ATOM    202  CA  LEU A  14      71.100 -26.313  28.545  1.00  0.00           C
ATOM    203  C   LEU A  14      71.592 -27.611  27.900  1.00  0.00           C
ATOM    204  O   LEU A  14      70.845 -28.584  27.770  1.00  0.00           O
ATOM    205  CB  LEU A  14      70.910 -25.227  27.482  1.00  0.00           C
ATOM    206  CG  LEU A  14      70.077 -25.674  26.274  1.00  0.00           C
ATOM    207  CD1 LEU A  14      68.654 -25.963  26.711  1.00  0.00           C
ATOM    208  CD2 LEU A  14      70.102 -24.632  25.154  1.00  0.00           C
ATOM    209  H   LEU A  14      72.423 -24.937  29.507  1.00  0.00           H
ATOM    210  HA  LEU A  14      70.141 -26.524  29.018  1.00  0.00           H
ATOM    211  HB2 LEU A  14      71.884 -24.918  27.111  1.00  0.00           H
ATOM    212  HB3 LEU A  14      70.443 -24.354  27.941  1.00  0.00           H
ATOM    213  HG  LEU A  14      70.498 -26.583  25.849  1.00  0.00           H
ATOM    214 HD21 LEU A  14      71.127 -24.455  24.829  1.00  0.00           H
ATOM    215 HD22 LEU A  14      69.528 -24.992  24.299  1.00  0.00           H
ATOM    216 HD23 LEU A  14      69.665 -23.694  25.496  1.00  0.00           H
ATOM    217 HD11 LEU A  14      68.066 -26.230  25.836  1.00  0.00           H
ATOM    218 HD12 LEU A  14      68.627 -26.798  27.408  1.00  0.00           H
ATOM    219 HD13 LEU A  14      68.218 -25.075  27.167  1.00  0.00           H
ATOM    220  N   MET A  15      72.860 -27.629  27.511  1.00  0.00           N
ATOM    221  CA  MET A  15      73.426 -28.810  26.870  1.00  0.00           C
ATOM    222  C   MET A  15      73.397 -30.001  27.824  1.00  0.00           C
ATOM    223  O   MET A  15      73.120 -31.133  27.420  1.00  0.00           O
ATOM    224  CB  MET A  15      74.846 -28.525  26.367  1.00  0.00           C
ATOM    225  CG  MET A  15      74.894 -27.455  25.277  1.00  0.00           C
ATOM    226  SD  MET A  15      76.543 -27.117  24.602  1.00  0.00           S
ATOM    227  CE  MET A  15      76.914 -28.652  23.762  1.00  0.00           C
ATOM    228  H   MET A  15      73.407 -26.776  27.567  1.00  0.00           H
ATOM    229  HA  MET A  15      72.809 -29.074  26.010  1.00  0.00           H
ATOM    230  HB2 MET A  15      75.472 -28.208  27.201  1.00  0.00           H
ATOM    231  HB3 MET A  15      75.251 -29.455  25.972  1.00  0.00           H
ATOM    232  HG2 MET A  15      74.468 -26.525  25.629  1.00  0.00           H
ATOM    233  HG3 MET A  15      74.264 -27.789  24.452  1.00  0.00           H
ATOM    234  HE1 MET A  15      76.252 -28.762  22.903  1.00  0.00           H
ATOM    235  HE2 MET A  15      77.944 -28.638  23.408  1.00  0.00           H
ATOM    236  HE3 MET A  15      76.757 -29.487  24.433  1.00  0.00           H
ATOM    237  N   SER A  16      73.659 -29.727  29.098  1.00  0.00           N
ATOM    238  CA  SER A  16      73.620 -30.750  30.136  1.00  0.00           C
ATOM    239  C   SER A  16      72.237 -31.384  30.219  1.00  0.00           C
ATOM    240  O   SER A  16      72.100 -32.610  30.231  1.00  0.00           O
ATOM    241  CB  SER A  16      74.013 -30.147  31.494  1.00  0.00           C
ATOM    242  OG  SER A  16      73.716 -31.049  32.541  1.00  0.00           O
ATOM    243  H   SER A  16      73.926 -28.782  29.344  1.00  0.00           H
ATOM    244  HA  SER A  16      74.326 -31.545  29.895  1.00  0.00           H
ATOM    245  HB2 SER A  16      73.452 -29.232  31.664  1.00  0.00           H
ATOM    246  HB3 SER A  16      75.078 -29.914  31.493  1.00  0.00           H
ATOM    247  HG  SER A  16      73.805 -30.610  33.387  1.00  0.00           H
ATOM    248  N   LEU A  17      71.213 -30.540  30.269  1.00  0.00           N
ATOM    249  CA  LEU A  17      69.834 -31.007  30.263  1.00  0.00           C
ATOM    250  C   LEU A  17      69.560 -31.897  29.048  1.00  0.00           C
ATOM    251  O   LEU A  17      69.025 -32.997  29.171  1.00  0.00           O
ATOM    252  CB  LEU A  17      68.873 -29.815  30.245  1.00  0.00           C
ATOM    253  CG  LEU A  17      67.428 -30.180  29.883  1.00  0.00           C
ATOM    254  CD1 LEU A  17      66.691 -30.644  31.125  1.00  0.00           C
ATOM    255  CD2 LEU A  17      66.694 -29.013  29.230  1.00  0.00           C
ATOM    256  H   LEU A  17      71.393 -29.542  30.268  1.00  0.00           H
ATOM    257  HA  LEU A  17      69.653 -31.604  31.157  1.00  0.00           H
ATOM    258  HB2 LEU A  17      69.227 -29.102  29.505  1.00  0.00           H
ATOM    259  HB3 LEU A  17      68.906 -29.304  31.208  1.00  0.00           H
ATOM    260  HG  LEU A  17      67.361 -30.976  29.149  1.00  0.00           H
ATOM    261 HD11 LEU A  17      65.668 -30.913  30.864  1.00  0.00           H
ATOM    262 HD12 LEU A  17      67.190 -31.519  31.543  1.00  0.00           H
ATOM    263 HD13 LEU A  17      66.670 -29.847  31.869  1.00  0.00           H
ATOM    264 HD21 LEU A  17      67.230 -28.698  28.334  1.00  0.00           H
ATOM    265 HD22 LEU A  17      66.635 -28.179  29.928  1.00  0.00           H
ATOM    266 HD23 LEU A  17      65.691 -29.324  28.941  1.00  0.00           H
ATOM    267  N   ILE A  18      69.926 -31.406  27.873  1.00  0.00           N
ATOM    268  CA  ILE A  18      69.645 -32.104  26.629  1.00  0.00           C
ATOM    269  C   ILE A  18      70.318 -33.476  26.581  1.00  0.00           C
ATOM    270  O   ILE A  18      69.725 -34.470  26.152  1.00  0.00           O
ATOM    271  CB  ILE A  18      70.125 -31.263  25.426  1.00  0.00           C
ATOM    272  CG1 ILE A  18      69.215 -30.051  25.231  1.00  0.00           C
ATOM    273  CG2 ILE A  18      70.193 -32.115  24.163  1.00  0.00           C
ATOM    274  CD1 ILE A  18      69.712 -29.090  24.166  1.00  0.00           C
ATOM    275  H   ILE A  18      70.365 -30.490  27.841  1.00  0.00           H
ATOM    276  HA  ILE A  18      68.571 -32.268  26.540  1.00  0.00           H
ATOM    277  HB  ILE A  18      71.134 -30.904  25.632  1.00  0.00           H
ATOM    278 HG12 ILE A  18      69.135 -29.500  26.166  1.00  0.00           H
ATOM    279 HG13 ILE A  18      68.212 -30.385  24.962  1.00  0.00           H
ATOM    280 HG21 ILE A  18      70.424 -31.505  23.292  1.00  0.00           H
ATOM    281 HG22 ILE A  18      70.987 -32.860  24.226  1.00  0.00           H
ATOM    282 HG23 ILE A  18      69.241 -32.602  24.010  1.00  0.00           H
ATOM    283 HD11 ILE A  18      69.195 -28.138  24.275  1.00  0.00           H
ATOM    284 HD12 ILE A  18      69.492 -29.483  23.177  1.00  0.00           H
ATOM    285 HD13 ILE A  18      70.782 -28.922  24.283  1.00  0.00           H
ATOM    286  N   ILE A  19      71.564 -33.517  27.030  1.00  0.00           N
ATOM    287  CA  ILE A  19      72.360 -34.732  27.003  1.00  0.00           C
ATOM    288  C   ILE A  19      71.861 -35.783  27.993  1.00  0.00           C
ATOM    289  O   ILE A  19      71.964 -36.984  27.741  1.00  0.00           O
ATOM    290  CB  ILE A  19      73.828 -34.398  27.307  1.00  0.00           C
ATOM    291  CG1 ILE A  19      74.489 -33.793  26.067  1.00  0.00           C
ATOM    292  CG2 ILE A  19      74.578 -35.627  27.751  1.00  0.00           C
ATOM    293  CD1 ILE A  19      75.865 -33.246  26.341  1.00  0.00           C
ATOM    294  H   ILE A  19      72.007 -32.654  27.332  1.00  0.00           H
ATOM    295  HA  ILE A  19      72.302 -35.178  26.010  1.00  0.00           H
ATOM    296  HB  ILE A  19      73.863 -33.674  28.124  1.00  0.00           H
ATOM    297 HG12 ILE A  19      73.870 -32.975  25.697  1.00  0.00           H
ATOM    298 HG13 ILE A  19      74.550 -34.539  25.273  1.00  0.00           H
ATOM    299 HD11 ILE A  19      76.035 -33.099  27.408  1.00  0.00           H
ATOM    300 HD12 ILE A  19      75.929 -32.278  25.854  1.00  0.00           H
ATOM    301 HD13 ILE A  19      76.623 -33.918  25.937  1.00  0.00           H
ATOM    302 HG21 ILE A  19      75.644 -35.415  27.829  1.00  0.00           H
ATOM    303 HG22 ILE A  19      74.261 -35.948  28.743  1.00  0.00           H
ATOM    304 HG23 ILE A  19      74.452 -36.436  27.030  1.00  0.00           H
ATOM    305  N   ASN A  20      71.310 -35.334  29.114  1.00  0.00           N
ATOM    306  CA  ASN A  20      70.855 -36.265  30.138  1.00  0.00           C
ATOM    307  C   ASN A  20      69.362 -36.575  30.139  1.00  0.00           C
ATOM    308  O   ASN A  20      68.913 -37.400  30.928  1.00  0.00           O
ATOM    309  CB  ASN A  20      71.271 -35.773  31.521  1.00  0.00           C
ATOM    310  CG  ASN A  20      72.770 -35.710  31.682  1.00  0.00           C
ATOM    311  OD1 ASN A  20      73.325 -34.663  32.015  1.00  0.00           O
ATOM    312  ND2 ASN A  20      73.439 -36.827  31.435  1.00  0.00           N
ATOM    313  H   ASN A  20      71.336 -34.338  29.317  1.00  0.00           H
ATOM    314  HA  ASN A  20      71.325 -37.235  29.978  1.00  0.00           H
ATOM    315  HB2 ASN A  20      70.860 -34.777  31.693  1.00  0.00           H
ATOM    316  HB3 ASN A  20      70.887 -36.446  32.286  1.00  0.00           H
ATOM    317 HD21 ASN A  20      74.438 -36.733  31.421  1.00  0.00           H
ATOM    318 HD22 ASN A  20      72.966 -37.617  31.041  1.00  0.00           H
ATOM    319  N   THR A  21      68.591 -35.929  29.268  1.00  0.00           N
ATOM    320  CA  THR A  21      67.143 -36.107  29.307  1.00  0.00           C
ATOM    321  C   THR A  21      66.692 -37.424  28.699  1.00  0.00           C
ATOM    322  O   THR A  21      67.366 -37.980  27.832  1.00  0.00           O
ATOM    323  CB  THR A  21      66.382 -34.966  28.602  1.00  0.00           C
ATOM    324  OG1 THR A  21      64.976 -35.134  28.838  1.00  0.00           O
ATOM    325  CG2 THR A  21      66.641 -34.989  27.089  1.00  0.00           C
ATOM    326  H   THR A  21      69.001 -35.213  28.680  1.00  0.00           H
ATOM    327  HA  THR A  21      66.832 -36.098  30.352  1.00  0.00           H
ATOM    328  HB  THR A  21      66.701 -34.011  29.018  1.00  0.00           H
ATOM    329  HG1 THR A  21      64.590 -34.255  28.755  1.00  0.00           H
ATOM    330 HG21 THR A  21      66.369 -34.028  26.654  1.00  0.00           H
ATOM    331 HG22 THR A  21      67.681 -35.194  26.898  1.00  0.00           H
ATOM    332 HG23 THR A  21      66.060 -35.778  26.614  1.00  0.00           H
ATOM    333  N   PHE A  22      65.546 -37.918  29.159  1.00  0.00           N
ATOM    334  CA  PHE A  22      64.948 -39.113  28.577  1.00  0.00           C
ATOM    335  C   PHE A  22      63.781 -38.759  27.662  1.00  0.00           C
ATOM    336  O   PHE A  22      63.058 -39.637  27.198  1.00  0.00           O
ATOM    337  CB  PHE A  22      64.522 -40.101  29.668  1.00  0.00           C
ATOM    338  CG  PHE A  22      65.675 -40.645  30.468  1.00  0.00           C
ATOM    339  CD1 PHE A  22      65.956 -40.149  31.735  1.00  0.00           C
ATOM    340  CD2 PHE A  22      66.491 -41.643  29.945  1.00  0.00           C
ATOM    341  CE1 PHE A  22      67.025 -40.640  32.474  1.00  0.00           C
ATOM    342  CE2 PHE A  22      67.559 -42.142  30.679  1.00  0.00           C
ATOM    343  CZ  PHE A  22      67.826 -41.637  31.947  1.00  0.00           C
ATOM    344  H   PHE A  22      65.049 -37.404  29.870  1.00  0.00           H
ATOM    345  HA  PHE A  22      65.677 -39.628  27.951  1.00  0.00           H
ATOM    346  HB2 PHE A  22      64.013 -40.948  29.206  1.00  0.00           H
ATOM    347  HB3 PHE A  22      63.808 -39.615  30.334  1.00  0.00           H
ATOM    348  HD1 PHE A  22      65.348 -39.359  32.149  1.00  0.00           H
ATOM    349  HD2 PHE A  22      66.300 -42.031  28.955  1.00  0.00           H
ATOM    350  HE1 PHE A  22      67.246 -40.227  33.448  1.00  0.00           H
ATOM    351  HE2 PHE A  22      68.195 -42.907  30.256  1.00  0.00           H
ATOM    352  HZ  PHE A  22      68.671 -42.008  32.509  1.00  0.00           H
ATOM    353  N   TYR A  23      63.610 -37.465  27.410  1.00  0.00           N
ATOM    354  CA  TYR A  23      62.639 -36.970  26.432  1.00  0.00           C
ATOM    355  C   TYR A  23      62.685 -37.828  25.162  1.00  0.00           C
ATOM    356  O   TYR A  23      63.727 -37.938  24.520  1.00  0.00           O
ATOM    357  CB  TYR A  23      62.953 -35.503  26.131  1.00  0.00           C
ATOM    358  CG  TYR A  23      61.996 -34.783  25.202  1.00  0.00           C
ATOM    359  CD1 TYR A  23      60.691 -34.508  25.587  1.00  0.00           C
ATOM    360  CD2 TYR A  23      62.418 -34.334  23.952  1.00  0.00           C
ATOM    361  CE1 TYR A  23      59.820 -33.828  24.740  1.00  0.00           C
ATOM    362  CE2 TYR A  23      61.556 -33.657  23.098  1.00  0.00           C
ATOM    363  CZ  TYR A  23      60.260 -33.406  23.500  1.00  0.00           C
ATOM    364  OH  TYR A  23      59.400 -32.738  22.659  1.00  0.00           O
ATOM    365  H   TYR A  23      64.249 -36.801  27.831  1.00  0.00           H
ATOM    366  HA  TYR A  23      61.643 -37.034  26.869  1.00  0.00           H
ATOM    367  HB2 TYR A  23      63.020 -34.928  27.047  1.00  0.00           H
ATOM    368  HB3 TYR A  23      63.947 -35.461  25.685  1.00  0.00           H
ATOM    369  HD1 TYR A  23      60.349 -34.811  26.567  1.00  0.00           H
ATOM    370  HD2 TYR A  23      63.437 -34.514  23.633  1.00  0.00           H
ATOM    371  HE1 TYR A  23      58.810 -33.626  25.057  1.00  0.00           H
ATOM    372  HE2 TYR A  23      61.897 -33.321  22.129  1.00  0.00           H
ATOM    373  HH  TYR A  23      58.572 -32.548  23.106  1.00  0.00           H
ATOM    374  N   SER A  24      61.559 -38.448  24.816  1.00  0.00           N
ATOM    375  CA  SER A  24      61.526 -39.420  23.718  1.00  0.00           C
ATOM    376  C   SER A  24      61.305 -38.823  22.323  1.00  0.00           C
ATOM    377  O   SER A  24      61.515 -39.496  21.314  1.00  0.00           O
ATOM    378  CB  SER A  24      60.461 -40.490  23.979  1.00  0.00           C
ATOM    379  OG  SER A  24      59.158 -39.939  23.877  1.00  0.00           O
ATOM    380  H   SER A  24      60.757 -38.398  25.424  1.00  0.00           H
ATOM    381  HA  SER A  24      62.486 -39.937  23.687  1.00  0.00           H
ATOM    382  HB2 SER A  24      60.571 -41.283  23.238  1.00  0.00           H
ATOM    383  HB3 SER A  24      60.607 -40.918  24.972  1.00  0.00           H
ATOM    384  HG  SER A  24      58.532 -40.666  23.800  1.00  0.00           H
ATOM    385  N   ASN A  25      60.875 -37.570  22.268  1.00  0.00           N
ATOM    386  CA  ASN A  25      60.611 -36.917  20.997  1.00  0.00           C
ATOM    387  C   ASN A  25      61.875 -36.294  20.396  1.00  0.00           C
ATOM    388  O   ASN A  25      61.885 -35.123  20.029  1.00  0.00           O
ATOM    389  CB  ASN A  25      59.529 -35.853  21.191  1.00  0.00           C
ATOM    390  CG  ASN A  25      59.070 -35.229  19.879  1.00  0.00           C
ATOM    391  OD1 ASN A  25      58.893 -35.917  18.871  1.00  0.00           O
ATOM    392  ND2 ASN A  25      58.856 -33.918  19.898  1.00  0.00           N
ATOM    393  H   ASN A  25      60.727 -37.065  23.127  1.00  0.00           H
ATOM    394  HA  ASN A  25      60.238 -37.654  20.280  1.00  0.00           H
ATOM    395  HB2 ASN A  25      58.657 -36.298  21.668  1.00  0.00           H
ATOM    396  HB3 ASN A  25      59.919 -35.094  21.829  1.00  0.00           H
ATOM    397 HD21 ASN A  25      58.757 -33.495  18.998  1.00  0.00           H
ATOM    398 HD22 ASN A  25      59.178 -33.404  20.707  1.00  0.00           H
ATOM    399  N   LYS A  26      62.940 -37.082  20.292  1.00  0.00           N
ATOM    400  CA  LYS A  26      64.227 -36.581  19.802  1.00  0.00           C
ATOM    401  C   LYS A  26      64.199 -36.077  18.361  1.00  0.00           C
ATOM    402  O   LYS A  26      65.044 -35.273  17.954  1.00  0.00           O
ATOM    403  CB  LYS A  26      65.298 -37.666  19.934  1.00  0.00           C
ATOM    404  CG  LYS A  26      65.623 -38.042  21.378  1.00  0.00           C
ATOM    405  CD  LYS A  26      66.491 -39.283  21.433  1.00  0.00           C
ATOM    406  CE  LYS A  26      66.675 -39.781  22.869  1.00  0.00           C
ATOM    407  NZ  LYS A  26      67.379 -38.788  23.736  1.00  0.00           N
ATOM    408  H   LYS A  26      62.850 -38.055  20.568  1.00  0.00           H
ATOM    409  HA  LYS A  26      64.529 -35.724  20.404  1.00  0.00           H
ATOM    410  HB2 LYS A  26      64.968 -38.553  19.387  1.00  0.00           H
ATOM    411  HB3 LYS A  26      66.217 -37.309  19.470  1.00  0.00           H
ATOM    412  HG2 LYS A  26      64.695 -38.257  21.909  1.00  0.00           H
ATOM    413  HG3 LYS A  26      66.118 -37.209  21.874  1.00  0.00           H
ATOM    414  HD2 LYS A  26      67.462 -39.084  20.978  1.00  0.00           H
ATOM    415  HD3 LYS A  26      66.017 -40.084  20.861  1.00  0.00           H
ATOM    416  HE2 LYS A  26      65.695 -40.026  23.289  1.00  0.00           H
ATOM    417  HE3 LYS A  26      67.257 -40.710  22.817  1.00  0.00           H
ATOM    418  HZ1 LYS A  26      67.611 -39.198  24.633  1.00  0.00           H
ATOM    419  HZ2 LYS A  26      68.227 -38.487  23.272  1.00  0.00           H
ATOM    420  HZ3 LYS A  26      66.786 -37.985  23.896  1.00  0.00           H
ATOM    421  N   GLU A  27      63.238 -36.558  17.585  1.00  0.00           N
ATOM    422  CA  GLU A  27      63.183 -36.241  16.165  1.00  0.00           C
ATOM    423  C   GLU A  27      63.102 -34.740  15.895  1.00  0.00           C
ATOM    424  O   GLU A  27      63.317 -34.310  14.767  1.00  0.00           O
ATOM    425  CB  GLU A  27      61.991 -36.947  15.514  1.00  0.00           C
ATOM    426  CG  GLU A  27      60.643 -36.452  16.015  1.00  0.00           C
ATOM    427  CD  GLU A  27      59.487 -37.311  15.531  1.00  0.00           C
ATOM    428  OE1 GLU A  27      59.714 -38.498  15.210  1.00  0.00           O
ATOM    429  OE2 GLU A  27      58.351 -36.800  15.476  1.00  0.00           O
ATOM    430  H   GLU A  27      62.614 -37.252  17.962  1.00  0.00           H
ATOM    431  HA  GLU A  27      64.098 -36.601  15.690  1.00  0.00           H
ATOM    432  HB2 GLU A  27      62.091 -38.012  15.717  1.00  0.00           H
ATOM    433  HB3 GLU A  27      62.046 -36.799  14.441  1.00  0.00           H
ATOM    434  HG2 GLU A  27      60.649 -36.466  17.104  1.00  0.00           H
ATOM    435  HG3 GLU A  27      60.490 -35.421  15.685  1.00  0.00           H
ATOM    436  N   ILE A  28      62.796 -33.943  16.920  1.00  0.00           N
ATOM    437  CA  ILE A  28      62.627 -32.503  16.717  1.00  0.00           C
ATOM    438  C   ILE A  28      63.899 -31.785  16.294  1.00  0.00           C
ATOM    439  O   ILE A  28      63.838 -30.645  15.841  1.00  0.00           O
ATOM    440  CB  ILE A  28      62.115 -31.784  17.970  1.00  0.00           C
ATOM    441  CG1 ILE A  28      63.067 -32.030  19.138  1.00  0.00           C
ATOM    442  CG2 ILE A  28      60.704 -32.215  18.289  1.00  0.00           C
ATOM    443  CD1 ILE A  28      62.813 -31.113  20.307  1.00  0.00           C
ATOM    444  H   ILE A  28      62.645 -34.340  17.838  1.00  0.00           H
ATOM    445  HA  ILE A  28      61.909 -32.349  15.913  1.00  0.00           H
ATOM    446  HB  ILE A  28      62.086 -30.711  17.765  1.00  0.00           H
ATOM    447 HG12 ILE A  28      63.020 -33.060  19.475  1.00  0.00           H
ATOM    448 HG13 ILE A  28      64.095 -31.835  18.838  1.00  0.00           H
ATOM    449 HD11 ILE A  28      63.617 -31.255  21.027  1.00  0.00           H
ATOM    450 HD12 ILE A  28      62.821 -30.072  19.980  1.00  0.00           H
ATOM    451 HD13 ILE A  28      61.860 -31.341  20.782  1.00  0.00           H
ATOM    452 HG21 ILE A  28      60.330 -31.678  19.159  1.00  0.00           H
ATOM    453 HG22 ILE A  28      60.734 -33.286  18.471  1.00  0.00           H
ATOM    454 HG23 ILE A  28      60.063 -32.019  17.433  1.00  0.00           H
ATOM    455  N   PHE A  29      65.052 -32.426  16.467  1.00  0.00           N
ATOM    456  CA  PHE A  29      66.293 -31.801  16.044  1.00  0.00           C
ATOM    457  C   PHE A  29      66.161 -31.401  14.577  1.00  0.00           C
ATOM    458  O   PHE A  29      66.606 -30.331  14.173  1.00  0.00           O
ATOM    459  CB  PHE A  29      67.473 -32.755  16.204  1.00  0.00           C
ATOM    460  CG  PHE A  29      67.561 -33.797  15.119  1.00  0.00           C
ATOM    461  CD1 PHE A  29      68.351 -33.587  14.002  1.00  0.00           C
ATOM    462  CD2 PHE A  29      66.850 -34.979  15.217  1.00  0.00           C
ATOM    463  CE1 PHE A  29      68.433 -34.541  13.000  1.00  0.00           C
ATOM    464  CE2 PHE A  29      66.926 -35.942  14.224  1.00  0.00           C
ATOM    465  CZ  PHE A  29      67.723 -35.721  13.111  1.00  0.00           C
ATOM    466  H   PHE A  29      65.072 -33.349  16.881  1.00  0.00           H
ATOM    467  HA  PHE A  29      66.444 -30.902  16.620  1.00  0.00           H
ATOM    468  HB2 PHE A  29      67.421 -33.242  17.179  1.00  0.00           H
ATOM    469  HB3 PHE A  29      68.389 -32.162  16.189  1.00  0.00           H
ATOM    470  HD1 PHE A  29      68.914 -32.668  13.909  1.00  0.00           H
ATOM    471  HD2 PHE A  29      66.266 -35.177  16.083  1.00  0.00           H
ATOM    472  HE1 PHE A  29      69.056 -34.354  12.138  1.00  0.00           H
ATOM    473  HE2 PHE A  29      66.394 -36.875  14.330  1.00  0.00           H
ATOM    474  HZ  PHE A  29      67.802 -36.474  12.340  1.00  0.00           H
ATOM    475  N   LEU A  30      65.528 -32.265  13.788  1.00  0.00           N
ATOM    476  CA  LEU A  30      65.463 -32.053  12.346  1.00  0.00           C
ATOM    477  C   LEU A  30      64.713 -30.776  11.997  1.00  0.00           C
ATOM    478  O   LEU A  30      65.151 -30.006  11.147  1.00  0.00           O
ATOM    479  CB  LEU A  30      64.845 -33.254  11.624  1.00  0.00           C
ATOM    480  CG  LEU A  30      64.972 -33.116  10.104  1.00  0.00           C
ATOM    481  CD1 LEU A  30      66.417 -32.836   9.745  1.00  0.00           C
ATOM    482  CD2 LEU A  30      64.489 -34.351   9.384  1.00  0.00           C
ATOM    483  H   LEU A  30      65.223 -33.148  14.175  1.00  0.00           H
ATOM    484  HA  LEU A  30      66.499 -31.915  12.041  1.00  0.00           H
ATOM    485  HB2 LEU A  30      65.370 -34.155  11.946  1.00  0.00           H
ATOM    486  HB3 LEU A  30      63.793 -33.351  11.896  1.00  0.00           H
ATOM    487  HG  LEU A  30      64.369 -32.278   9.755  1.00  0.00           H
ATOM    488 HD11 LEU A  30      66.557 -32.914   8.667  1.00  0.00           H
ATOM    489 HD12 LEU A  30      67.083 -33.546  10.237  1.00  0.00           H
ATOM    490 HD13 LEU A  30      66.704 -31.816   9.997  1.00  0.00           H
ATOM    491 HD21 LEU A  30      65.089 -34.545   8.495  1.00  0.00           H
ATOM    492 HD22 LEU A  30      63.470 -34.182   9.053  1.00  0.00           H
ATOM    493 HD23 LEU A  30      64.549 -35.224  10.031  1.00  0.00           H
ATOM    494  N   ARG A  31      63.588 -30.539  12.658  1.00  0.00           N
ATOM    495  CA  ARG A  31      62.843 -29.317  12.392  1.00  0.00           C
ATOM    496  C   ARG A  31      63.621 -28.076  12.846  1.00  0.00           C
ATOM    497  O   ARG A  31      63.552 -27.028  12.208  1.00  0.00           O
ATOM    498  CB  ARG A  31      61.450 -29.359  13.027  1.00  0.00           C
ATOM    499  CG  ARG A  31      61.394 -28.847  14.443  1.00  0.00           C
ATOM    500  CD  ARG A  31      59.979 -28.446  14.830  1.00  0.00           C
ATOM    501  NE  ARG A  31      59.955 -27.815  16.146  1.00  0.00           N
ATOM    502  CZ  ARG A  31      59.394 -28.351  17.226  1.00  0.00           C
ATOM    503  NH1 ARG A  31      58.789 -29.531  17.148  1.00  0.00           N
ATOM    504  NH2 ARG A  31      59.427 -27.699  18.382  1.00  0.00           N
ATOM    505  H   ARG A  31      63.387 -31.099  13.473  1.00  0.00           H
ATOM    506  HA  ARG A  31      62.725 -29.206  11.312  1.00  0.00           H
ATOM    507  HB2 ARG A  31      60.812 -28.720  12.413  1.00  0.00           H
ATOM    508  HB3 ARG A  31      61.052 -30.372  12.988  1.00  0.00           H
ATOM    509  HG2 ARG A  31      61.748 -29.610  15.129  1.00  0.00           H
ATOM    510  HG3 ARG A  31      61.965 -27.935  14.588  1.00  0.00           H
ATOM    511  HD2 ARG A  31      59.628 -27.706  14.106  1.00  0.00           H
ATOM    512  HD3 ARG A  31      59.321 -29.308  14.750  1.00  0.00           H
ATOM    513  HE  ARG A  31      60.550 -27.000  16.292  1.00  0.00           H
ATOM    514 HH11 ARG A  31      58.876 -30.024  16.287  1.00  0.00           H
ATOM    515 HH12 ARG A  31      58.432 -29.919  17.997  1.00  0.00           H
ATOM    516 HH21 ARG A  31      58.919 -27.947  19.220  1.00  0.00           H
ATOM    517 HH22 ARG A  31      60.064 -26.908  18.443  1.00  0.00           H
ATOM    518  N   GLU A  32      64.367 -28.192  13.940  1.00  0.00           N
ATOM    519  CA  GLU A  32      65.152 -27.063  14.429  1.00  0.00           C
ATOM    520  C   GLU A  32      66.245 -26.682  13.425  1.00  0.00           C
ATOM    521  O   GLU A  32      66.411 -25.514  13.078  1.00  0.00           O
ATOM    522  CB  GLU A  32      65.776 -27.385  15.793  1.00  0.00           C
ATOM    523  CG  GLU A  32      64.762 -27.690  16.894  1.00  0.00           C
ATOM    524  CD  GLU A  32      63.885 -26.495  17.241  1.00  0.00           C
ATOM    525  OE1 GLU A  32      64.297 -25.350  16.962  1.00  0.00           O
ATOM    526  OE2 GLU A  32      62.783 -26.699  17.795  1.00  0.00           O
ATOM    527  H   GLU A  32      64.418 -29.066  14.443  1.00  0.00           H
ATOM    528  HA  GLU A  32      64.518 -26.180  14.546  1.00  0.00           H
ATOM    529  HB2 GLU A  32      66.423 -28.253  15.684  1.00  0.00           H
ATOM    530  HB3 GLU A  32      66.410 -26.554  16.104  1.00  0.00           H
ATOM    531  HG2 GLU A  32      65.293 -28.009  17.793  1.00  0.00           H
ATOM    532  HG3 GLU A  32      64.107 -28.491  16.590  1.00  0.00           H
ATOM    533  N   LEU A  33      66.982 -27.679  12.953  1.00  0.00           N
ATOM    534  CA  LEU A  33      68.094 -27.433  12.049  1.00  0.00           C
ATOM    535  C   LEU A  33      67.611 -26.925  10.691  1.00  0.00           C
ATOM    536  O   LEU A  33      68.219 -26.034  10.099  1.00  0.00           O
ATOM    537  CB  LEU A  33      68.943 -28.696  11.885  1.00  0.00           C
ATOM    538  CG  LEU A  33      69.564 -29.224  13.187  1.00  0.00           C
ATOM    539  CD1 LEU A  33      70.555 -30.355  12.914  1.00  0.00           C
ATOM    540  CD2 LEU A  33      70.231 -28.105  13.969  1.00  0.00           C
ATOM    541  H   LEU A  33      66.844 -28.607  13.336  1.00  0.00           H
ATOM    542  HA  LEU A  33      68.710 -26.631  12.460  1.00  0.00           H
ATOM    543  HB2 LEU A  33      68.333 -29.485  11.444  1.00  0.00           H
ATOM    544  HB3 LEU A  33      69.751 -28.466  11.188  1.00  0.00           H
ATOM    545  HG  LEU A  33      68.797 -29.632  13.826  1.00  0.00           H
ATOM    546 HD21 LEU A  33      70.773 -28.519  14.819  1.00  0.00           H
ATOM    547 HD22 LEU A  33      70.930 -27.564  13.332  1.00  0.00           H
ATOM    548 HD23 LEU A  33      69.486 -27.414  14.365  1.00  0.00           H
ATOM    549 HD11 LEU A  33      70.058 -31.143  12.351  1.00  0.00           H
ATOM    550 HD12 LEU A  33      70.917 -30.752  13.862  1.00  0.00           H
ATOM    551 HD13 LEU A  33      71.399 -29.975  12.337  1.00  0.00           H
ATOM    552  N   ILE A  34      66.510 -27.478  10.200  1.00  0.00           N
ATOM    553  CA  ILE A  34      66.004 -27.049   8.903  1.00  0.00           C
ATOM    554  C   ILE A  34      65.455 -25.629   8.974  1.00  0.00           C
ATOM    555  O   ILE A  34      65.616 -24.856   8.027  1.00  0.00           O
ATOM    556  CB  ILE A  34      64.975 -28.028   8.330  1.00  0.00           C
ATOM    557  CG1 ILE A  34      65.672 -29.337   7.979  1.00  0.00           C
ATOM    558  CG2 ILE A  34      64.362 -27.480   7.067  1.00  0.00           C
ATOM    559  CD1 ILE A  34      65.101 -30.002   6.758  1.00  0.00           C
ATOM    560  H   ILE A  34      66.046 -28.215  10.717  1.00  0.00           H
ATOM    561  HA  ILE A  34      66.842 -27.000   8.205  1.00  0.00           H
ATOM    562  HB  ILE A  34      64.181 -28.208   9.057  1.00  0.00           H
ATOM    563 HG12 ILE A  34      65.596 -30.029   8.808  1.00  0.00           H
ATOM    564 HG13 ILE A  34      66.733 -29.167   7.786  1.00  0.00           H
ATOM    565 HD11 ILE A  34      65.533 -30.999   6.726  1.00  0.00           H
ATOM    566 HD12 ILE A  34      64.023 -30.143   6.848  1.00  0.00           H
ATOM    567 HD13 ILE A  34      65.375 -29.491   5.834  1.00  0.00           H
ATOM    568 HG21 ILE A  34      63.907 -26.538   7.324  1.00  0.00           H
ATOM    569 HG22 ILE A  34      65.115 -27.289   6.300  1.00  0.00           H
ATOM    570 HG23 ILE A  34      63.530 -28.073   6.692  1.00  0.00           H
ATOM    571  N   SER A  35      64.837 -25.278  10.103  1.00  0.00           N
ATOM    572  CA  SER A  35      64.374 -23.905  10.316  1.00  0.00           C
ATOM    573  C   SER A  35      65.547 -22.942  10.327  1.00  0.00           C
ATOM    574  O   SER A  35      65.476 -21.864   9.747  1.00  0.00           O
ATOM    575  CB  SER A  35      63.600 -23.771  11.629  1.00  0.00           C
ATOM    576  OG  SER A  35      62.494 -24.651  11.644  1.00  0.00           O
ATOM    577  H   SER A  35      64.787 -25.927  10.877  1.00  0.00           H
ATOM    578  HA  SER A  35      63.711 -23.613   9.502  1.00  0.00           H
ATOM    579  HB2 SER A  35      64.254 -23.991  12.475  1.00  0.00           H
ATOM    580  HB3 SER A  35      63.244 -22.744  11.726  1.00  0.00           H
ATOM    581  HG  SER A  35      62.858 -25.523  11.879  1.00  0.00           H
ATOM    582  N   ASN A  36      66.624 -23.330  10.996  1.00  0.00           N
ATOM    583  CA  ASN A  36      67.828 -22.501  11.014  1.00  0.00           C
ATOM    584  C   ASN A  36      68.365 -22.256   9.612  1.00  0.00           C
ATOM    585  O   ASN A  36      68.806 -21.156   9.292  1.00  0.00           O
ATOM    586  CB  ASN A  36      68.916 -23.150  11.866  1.00  0.00           C
ATOM    587  CG  ASN A  36      68.659 -23.000  13.351  1.00  0.00           C
ATOM    588  OD1 ASN A  36      67.755 -22.265  13.772  1.00  0.00           O
ATOM    589  ND2 ASN A  36      69.463 -23.687  14.157  1.00  0.00           N
ATOM    590  H   ASN A  36      66.557 -24.099  11.654  1.00  0.00           H
ATOM    591  HA  ASN A  36      67.577 -21.521  11.434  1.00  0.00           H
ATOM    592  HB2 ASN A  36      69.015 -24.203  11.628  1.00  0.00           H
ATOM    593  HB3 ASN A  36      69.850 -22.646  11.650  1.00  0.00           H
ATOM    594 HD21 ASN A  36      69.279 -23.402  15.126  1.00  0.00           H
ATOM    595 HD22 ASN A  36      70.184 -24.300  13.827  1.00  0.00           H
ATOM    596  N   ALA A  37      68.340 -23.298   8.787  1.00  0.00           N
ATOM    597  CA  ALA A  37      68.802 -23.205   7.410  1.00  0.00           C
ATOM    598  C   ALA A  37      67.902 -22.246   6.637  1.00  0.00           C
ATOM    599  O   ALA A  37      68.376 -21.417   5.859  1.00  0.00           O
ATOM    600  CB  ALA A  37      68.796 -24.584   6.763  1.00  0.00           C
ATOM    601  H   ALA A  37      67.998 -24.182   9.138  1.00  0.00           H
ATOM    602  HA  ALA A  37      69.820 -22.808   7.391  1.00  0.00           H
ATOM    603  HB1 ALA A  37      69.071 -24.488   5.715  1.00  0.00           H
ATOM    604  HB2 ALA A  37      69.525 -25.225   7.261  1.00  0.00           H
ATOM    605  HB3 ALA A  37      67.812 -25.040   6.828  1.00  0.00           H
ATOM    606  N   SER A  38      66.599 -22.355   6.872  1.00  0.00           N
ATOM    607  CA  SER A  38      65.632 -21.485   6.218  1.00  0.00           C
ATOM    608  C   SER A  38      65.864 -20.017   6.599  1.00  0.00           C
ATOM    609  O   SER A  38      65.788 -19.123   5.753  1.00  0.00           O
ATOM    610  CB  SER A  38      64.208 -21.929   6.575  1.00  0.00           C
ATOM    611  OG  SER A  38      63.232 -21.116   5.951  1.00  0.00           O
ATOM    612  H   SER A  38      66.277 -23.034   7.553  1.00  0.00           H
ATOM    613  HA  SER A  38      65.753 -21.565   5.139  1.00  0.00           H
ATOM    614  HB2 SER A  38      64.068 -22.963   6.259  1.00  0.00           H
ATOM    615  HB3 SER A  38      64.068 -21.876   7.655  1.00  0.00           H
ATOM    616  HG  SER A  38      63.277 -20.236   6.363  1.00  0.00           H
ATOM    617  N   ASP A  39      66.157 -19.772   7.874  1.00  0.00           N
ATOM    618  CA  ASP A  39      66.394 -18.409   8.347  1.00  0.00           C
ATOM    619  C   ASP A  39      67.668 -17.830   7.736  1.00  0.00           C
ATOM    620  O   ASP A  39      67.710 -16.663   7.340  1.00  0.00           O
ATOM    621  CB  ASP A  39      66.481 -18.370   9.876  1.00  0.00           C
ATOM    622  CG  ASP A  39      65.154 -18.714  10.555  1.00  0.00           C
ATOM    623  OD1 ASP A  39      64.089 -18.612   9.898  1.00  0.00           O
ATOM    624  OD2 ASP A  39      65.179 -19.084  11.755  1.00  0.00           O
ATOM    625  H   ASP A  39      66.044 -20.504   8.571  1.00  0.00           H
ATOM    626  HA  ASP A  39      65.557 -17.778   8.040  1.00  0.00           H
ATOM    627  HB2 ASP A  39      67.254 -19.062  10.215  1.00  0.00           H
ATOM    628  HB3 ASP A  39      66.770 -17.363  10.184  1.00  0.00           H
ATOM    629  N   ALA A  40      68.706 -18.656   7.662  1.00  0.00           N
ATOM    630  CA  ALA A  40      69.984 -18.231   7.113  1.00  0.00           C
ATOM    631  C   ALA A  40      69.833 -17.897   5.627  1.00  0.00           C
ATOM    632  O   ALA A  40      70.458 -16.968   5.117  1.00  0.00           O
ATOM    633  CB  ALA A  40      71.032 -19.319   7.318  1.00  0.00           C
ATOM    634  H   ALA A  40      68.621 -19.585   8.071  1.00  0.00           H
ATOM    635  HA  ALA A  40      70.308 -17.330   7.632  1.00  0.00           H
ATOM    636  HB1 ALA A  40      72.007 -18.973   6.979  1.00  0.00           H
ATOM    637  HB2 ALA A  40      70.759 -20.222   6.769  1.00  0.00           H
ATOM    638  HB3 ALA A  40      71.087 -19.566   8.379  1.00  0.00           H
ATOM    639  N   LEU A  41      68.992 -18.661   4.944  1.00  0.00           N
ATOM    640  CA  LEU A  41      68.699 -18.405   3.542  1.00  0.00           C
ATOM    641  C   LEU A  41      67.853 -17.146   3.394  1.00  0.00           C
ATOM    642  O   LEU A  41      68.093 -16.333   2.497  1.00  0.00           O
ATOM    643  CB  LEU A  41      68.005 -19.611   2.920  1.00  0.00           C
ATOM    644  CG  LEU A  41      68.985 -20.744   2.619  1.00  0.00           C
ATOM    645  CD1 LEU A  41      68.278 -22.088   2.490  1.00  0.00           C
ATOM    646  CD2 LEU A  41      69.795 -20.411   1.362  1.00  0.00           C
ATOM    647  H   LEU A  41      68.542 -19.442   5.417  1.00  0.00           H
ATOM    648  HA  LEU A  41      69.627 -18.230   3.017  1.00  0.00           H
ATOM    649  HB2 LEU A  41      67.220 -19.961   3.591  1.00  0.00           H
ATOM    650  HB3 LEU A  41      67.556 -19.314   1.981  1.00  0.00           H
ATOM    651  HG  LEU A  41      69.687 -20.836   3.447  1.00  0.00           H
ATOM    652 HD11 LEU A  41      67.757 -22.308   3.421  1.00  0.00           H
ATOM    653 HD12 LEU A  41      67.568 -22.058   1.668  1.00  0.00           H
ATOM    654 HD13 LEU A  41      69.020 -22.864   2.312  1.00  0.00           H
ATOM    655 HD21 LEU A  41      70.528 -21.198   1.193  1.00  0.00           H
ATOM    656 HD22 LEU A  41      70.304 -19.457   1.437  1.00  0.00           H
ATOM    657 HD23 LEU A  41      69.126 -20.371   0.513  1.00  0.00           H
ATOM    658  N   ASP A  42      66.872 -16.987   4.283  1.00  0.00           N
ATOM    659  CA  ASP A  42      66.084 -15.757   4.360  1.00  0.00           C
ATOM    660  C   ASP A  42      67.022 -14.562   4.309  1.00  0.00           C
ATOM    661  O   ASP A  42      66.817 -13.626   3.535  1.00  0.00           O
ATOM    662  CB  ASP A  42      65.314 -15.671   5.690  1.00  0.00           C
ATOM    663  CG  ASP A  42      64.017 -16.458   5.689  1.00  0.00           C
ATOM    664  OD1 ASP A  42      63.516 -16.821   4.601  1.00  0.00           O
ATOM    665  OD2 ASP A  42      63.485 -16.700   6.800  1.00  0.00           O
ATOM    666  H   ASP A  42      66.668 -17.729   4.951  1.00  0.00           H
ATOM    667  HA  ASP A  42      65.394 -15.688   3.522  1.00  0.00           H
ATOM    668  HB2 ASP A  42      65.854 -15.878   6.576  1.00  0.00           H
ATOM    669  HB3 ASP A  42      65.009 -14.628   5.800  1.00  0.00           H
ATOM    670  N   LYS A  43      68.051 -14.602   5.153  1.00  0.00           N
ATOM    671  CA  LYS A  43      68.932 -13.453   5.329  1.00  0.00           C
ATOM    672  C   LYS A  43      69.699 -13.106   4.062  1.00  0.00           C
ATOM    673  O   LYS A  43      69.773 -11.939   3.677  1.00  0.00           O
ATOM    674  CB  LYS A  43      69.905 -13.684   6.488  1.00  0.00           C
ATOM    675  CG  LYS A  43      69.218 -13.843   7.832  1.00  0.00           C
ATOM    676  CD  LYS A  43      70.224 -13.964   8.970  1.00  0.00           C
ATOM    677  CE  LYS A  43      69.532 -14.329  10.287  1.00  0.00           C
ATOM    678  NZ  LYS A  43      70.520 -14.704  11.341  1.00  0.00           N
ATOM    679  H   LYS A  43      68.085 -15.381   5.811  1.00  0.00           H
ATOM    680  HA  LYS A  43      68.321 -12.579   5.561  1.00  0.00           H
ATOM    681  HB2 LYS A  43      70.500 -14.576   6.288  1.00  0.00           H
ATOM    682  HB3 LYS A  43      70.582 -12.829   6.544  1.00  0.00           H
ATOM    683  HG2 LYS A  43      68.560 -14.682   7.846  1.00  0.00           H
ATOM    684  HG3 LYS A  43      68.607 -12.957   8.013  1.00  0.00           H
ATOM    685  HD2 LYS A  43      70.924 -14.762   8.717  1.00  0.00           H
ATOM    686  HD3 LYS A  43      70.774 -13.028   9.078  1.00  0.00           H
ATOM    687  HE2 LYS A  43      68.913 -13.489  10.614  1.00  0.00           H
ATOM    688  HE3 LYS A  43      68.863 -15.178  10.098  1.00  0.00           H
ATOM    689  HZ1 LYS A  43      70.041 -14.996  12.190  1.00  0.00           H
ATOM    690  HZ2 LYS A  43      71.052 -15.515  11.048  1.00  0.00           H
ATOM    691  HZ3 LYS A  43      71.152 -13.949  11.561  1.00  0.00           H
ATOM    692  N   ILE A  44      70.279 -14.112   3.418  1.00  0.00           N
ATOM    693  CA  ILE A  44      71.054 -13.853   2.216  1.00  0.00           C
ATOM    694  C   ILE A  44      70.143 -13.461   1.052  1.00  0.00           C
ATOM    695  O   ILE A  44      70.539 -12.681   0.189  1.00  0.00           O
ATOM    696  CB  ILE A  44      71.997 -15.023   1.834  1.00  0.00           C
ATOM    697  CG1 ILE A  44      72.908 -14.604   0.674  1.00  0.00           C
ATOM    698  CG2 ILE A  44      71.212 -16.279   1.480  1.00  0.00           C
ATOM    699  CD1 ILE A  44      73.753 -13.390   0.979  1.00  0.00           C
ATOM    700  H   ILE A  44      70.170 -15.054   3.775  1.00  0.00           H
ATOM    701  HA  ILE A  44      71.673 -12.984   2.434  1.00  0.00           H
ATOM    702  HB  ILE A  44      72.624 -15.248   2.693  1.00  0.00           H
ATOM    703 HG12 ILE A  44      73.582 -15.430   0.469  1.00  0.00           H
ATOM    704 HG13 ILE A  44      72.332 -14.432  -0.234  1.00  0.00           H
ATOM    705 HD11 ILE A  44      74.538 -13.307   0.227  1.00  0.00           H
ATOM    706 HD12 ILE A  44      74.220 -13.490   1.959  1.00  0.00           H
ATOM    707 HD13 ILE A  44      73.157 -12.479   0.943  1.00  0.00           H
ATOM    708 HG21 ILE A  44      70.649 -16.588   2.352  1.00  0.00           H
ATOM    709 HG22 ILE A  44      70.533 -16.114   0.646  1.00  0.00           H
ATOM    710 HG23 ILE A  44      71.901 -17.082   1.215  1.00  0.00           H
ATOM    711  N   ARG A  45      68.915 -13.969   1.039  1.00  0.00           N
ATOM    712  CA  ARG A  45      67.974 -13.558  -0.004  1.00  0.00           C
ATOM    713  C   ARG A  45      67.599 -12.098   0.210  1.00  0.00           C
ATOM    714  O   ARG A  45      67.505 -11.319  -0.740  1.00  0.00           O
ATOM    715  CB  ARG A  45      66.722 -14.445  -0.025  1.00  0.00           C
ATOM    716  CG  ARG A  45      65.707 -14.054  -1.101  1.00  0.00           C
ATOM    717  CD  ARG A  45      64.633 -15.125  -1.310  1.00  0.00           C
ATOM    718  NE  ARG A  45      63.894 -15.374  -0.081  1.00  0.00           N
ATOM    719  CZ  ARG A  45      63.079 -16.404   0.117  1.00  0.00           C
ATOM    720  NH1 ARG A  45      62.891 -17.301  -0.842  1.00  0.00           N
ATOM    721  NH2 ARG A  45      62.462 -16.539   1.289  1.00  0.00           N
ATOM    722  H   ARG A  45      68.639 -14.654   1.742  1.00  0.00           H
ATOM    723  HA  ARG A  45      68.460 -13.620  -0.977  1.00  0.00           H
ATOM    724  HB2 ARG A  45      66.244 -14.413   0.955  1.00  0.00           H
ATOM    725  HB3 ARG A  45      67.046 -15.472  -0.205  1.00  0.00           H
ATOM    726  HG2 ARG A  45      66.232 -13.909  -2.046  1.00  0.00           H
ATOM    727  HG3 ARG A  45      65.227 -13.113  -0.827  1.00  0.00           H
ATOM    728  HD2 ARG A  45      65.128 -16.040  -1.642  1.00  0.00           H
ATOM    729  HD3 ARG A  45      63.947 -14.789  -2.090  1.00  0.00           H
ATOM    730  HE  ARG A  45      64.046 -14.761   0.705  1.00  0.00           H
ATOM    731 HH11 ARG A  45      63.494 -17.278  -1.636  1.00  0.00           H
ATOM    732 HH12 ARG A  45      62.459 -18.184  -0.585  1.00  0.00           H
ATOM    733 HH21 ARG A  45      62.830 -16.113   2.134  1.00  0.00           H
ATOM    734 HH22 ARG A  45      61.913 -17.376   1.442  1.00  0.00           H
ATOM    735  N   TYR A  46      67.402 -11.726   1.470  1.00  0.00           N
ATOM    736  CA  TYR A  46      67.036 -10.359   1.812  1.00  0.00           C
ATOM    737  C   TYR A  46      68.158  -9.389   1.460  1.00  0.00           C
ATOM    738  O   TYR A  46      67.931  -8.390   0.780  1.00  0.00           O
ATOM    739  CB  TYR A  46      66.679 -10.257   3.296  1.00  0.00           C
ATOM    740  CG  TYR A  46      66.352  -8.855   3.778  1.00  0.00           C
ATOM    741  CD1 TYR A  46      65.036  -8.400   3.810  1.00  0.00           C
ATOM    742  CD2 TYR A  46      67.359  -7.992   4.221  1.00  0.00           C
ATOM    743  CE1 TYR A  46      64.726  -7.119   4.262  1.00  0.00           C
ATOM    744  CE2 TYR A  46      67.060  -6.708   4.676  1.00  0.00           C
ATOM    745  CZ  TYR A  46      65.741  -6.280   4.695  1.00  0.00           C
ATOM    746  OH  TYR A  46      65.430  -5.013   5.140  1.00  0.00           O
ATOM    747  H   TYR A  46      67.453 -12.420   2.209  1.00  0.00           H
ATOM    748  HA  TYR A  46      66.162 -10.065   1.230  1.00  0.00           H
ATOM    749  HB2 TYR A  46      65.825 -10.906   3.494  1.00  0.00           H
ATOM    750  HB3 TYR A  46      67.509 -10.635   3.893  1.00  0.00           H
ATOM    751  HD1 TYR A  46      64.245  -9.059   3.482  1.00  0.00           H
ATOM    752  HD2 TYR A  46      68.392  -8.321   4.233  1.00  0.00           H
ATOM    753  HE1 TYR A  46      63.701  -6.788   4.280  1.00  0.00           H
ATOM    754  HE2 TYR A  46      67.852  -6.057   5.019  1.00  0.00           H
ATOM    755  HH  TYR A  46      64.489  -4.859   5.105  1.00  0.00           H
ATOM    756  N   GLU A  47      69.371  -9.686   1.911  1.00  0.00           N
ATOM    757  CA  GLU A  47      70.505  -8.794   1.672  1.00  0.00           C
ATOM    758  C   GLU A  47      70.801  -8.623   0.185  1.00  0.00           C
ATOM    759  O   GLU A  47      71.261  -7.566  -0.250  1.00  0.00           O
ATOM    760  CB  GLU A  47      71.762  -9.289   2.401  1.00  0.00           C
ATOM    761  CG  GLU A  47      71.662  -9.268   3.929  1.00  0.00           C
ATOM    762  CD  GLU A  47      71.570  -7.860   4.499  1.00  0.00           C
ATOM    763  OE1 GLU A  47      72.045  -6.913   3.831  1.00  0.00           O
ATOM    764  OE2 GLU A  47      71.025  -7.699   5.616  1.00  0.00           O
ATOM    765  H   GLU A  47      69.493 -10.480   2.535  1.00  0.00           H
ATOM    766  HA  GLU A  47      70.260  -7.800   2.052  1.00  0.00           H
ATOM    767  HB2 GLU A  47      72.621  -8.693   2.091  1.00  0.00           H
ATOM    768  HB3 GLU A  47      71.958 -10.316   2.087  1.00  0.00           H
ATOM    769  HG2 GLU A  47      70.791  -9.830   4.255  1.00  0.00           H
ATOM    770  HG3 GLU A  47      72.551  -9.756   4.336  1.00  0.00           H
ATOM    771  N   SER A  48      70.533  -9.661  -0.598  1.00  0.00           N
ATOM    772  CA  SER A  48      70.959  -9.659  -1.990  1.00  0.00           C
ATOM    773  C   SER A  48      69.933  -9.050  -2.941  1.00  0.00           C
ATOM    774  O   SER A  48      70.237  -8.825  -4.108  1.00  0.00           O
ATOM    775  CB  SER A  48      71.318 -11.074  -2.443  1.00  0.00           C
ATOM    776  OG  SER A  48      70.164 -11.889  -2.500  1.00  0.00           O
ATOM    777  H   SER A  48      70.188 -10.515  -0.181  1.00  0.00           H
ATOM    778  HA  SER A  48      71.861  -9.063  -2.057  1.00  0.00           H
ATOM    779  HB2 SER A  48      72.059 -11.511  -1.772  1.00  0.00           H
ATOM    780  HB3 SER A  48      71.743 -10.991  -3.442  1.00  0.00           H
ATOM    781  HG  SER A  48      70.039 -12.214  -1.594  1.00  0.00           H
ATOM    782  N   ILE A  49      68.727  -8.777  -2.452  1.00  0.00           N
ATOM    783  CA  ILE A  49      67.688  -8.235  -3.325  1.00  0.00           C
ATOM    784  C   ILE A  49      68.003  -6.801  -3.757  1.00  0.00           C
ATOM    785  O   ILE A  49      67.645  -6.384  -4.860  1.00  0.00           O
ATOM    786  CB  ILE A  49      66.281  -8.310  -2.692  1.00  0.00           C
ATOM    787  CG1 ILE A  49      65.212  -7.978  -3.737  1.00  0.00           C
ATOM    788  CG2 ILE A  49      66.163  -7.374  -1.509  1.00  0.00           C
ATOM    789  CD1 ILE A  49      63.794  -8.200  -3.250  1.00  0.00           C
ATOM    790  H   ILE A  49      68.510  -9.024  -1.493  1.00  0.00           H
ATOM    791  HA  ILE A  49      67.675  -8.842  -4.232  1.00  0.00           H
ATOM    792  HB  ILE A  49      66.129  -9.334  -2.346  1.00  0.00           H
ATOM    793 HG12 ILE A  49      65.369  -8.611  -4.612  1.00  0.00           H
ATOM    794 HG13 ILE A  49      65.295  -6.938  -4.053  1.00  0.00           H
ATOM    795 HD11 ILE A  49      63.098  -8.001  -4.065  1.00  0.00           H
ATOM    796 HD12 ILE A  49      63.564  -7.529  -2.422  1.00  0.00           H
ATOM    797 HD13 ILE A  49      63.672  -9.233  -2.923  1.00  0.00           H
ATOM    798 HG21 ILE A  49      65.771  -6.405  -1.817  1.00  0.00           H
ATOM    799 HG22 ILE A  49      67.124  -7.190  -1.043  1.00  0.00           H
ATOM    800 HG23 ILE A  49      65.495  -7.805  -0.763  1.00  0.00           H
ATOM    801  N   THR A  50      68.675  -6.057  -2.884  1.00  0.00           N
ATOM    802  CA  THR A  50      69.117  -4.702  -3.202  1.00  0.00           C
ATOM    803  C   THR A  50      70.589  -4.699  -3.615  1.00  0.00           C
ATOM    804  O   THR A  50      71.133  -3.656  -3.969  1.00  0.00           O
ATOM    805  CB  THR A  50      68.935  -3.740  -2.001  1.00  0.00           C
ATOM    806  OG1 THR A  50      69.489  -4.332  -0.815  1.00  0.00           O
ATOM    807  CG2 THR A  50      67.461  -3.432  -1.763  1.00  0.00           C
ATOM    808  H   THR A  50      68.896  -6.440  -1.972  1.00  0.00           H
ATOM    809  HA  THR A  50      68.554  -4.304  -4.045  1.00  0.00           H
ATOM    810  HB  THR A  50      69.450  -2.801  -2.206  1.00  0.00           H
ATOM    811 HG21 THR A  50      67.374  -2.727  -0.937  1.00  0.00           H
ATOM    812 HG22 THR A  50      66.930  -4.346  -1.502  1.00  0.00           H
ATOM    813 HG23 THR A  50      67.024  -2.996  -2.660  1.00  0.00           H
ATOM    814  HG1 THR A  50      70.401  -4.602  -0.972  1.00  0.00           H
ATOM    815  N   ASP A  51      71.224  -5.870  -3.562  1.00  0.00           N
ATOM    816  CA  ASP A  51      72.651  -6.010  -3.871  1.00  0.00           C
ATOM    817  C   ASP A  51      72.972  -7.423  -4.365  1.00  0.00           C
ATOM    818  O   ASP A  51      73.371  -8.295  -3.590  1.00  0.00           O
ATOM    819  CB  ASP A  51      73.501  -5.675  -2.643  1.00  0.00           C
ATOM    820  CG  ASP A  51      74.987  -5.550  -2.967  1.00  0.00           C
ATOM    821  OD1 ASP A  51      75.416  -5.999  -4.054  1.00  0.00           O
ATOM    822  OD2 ASP A  51      75.732  -5.001  -2.126  1.00  0.00           O
ATOM    823  H   ASP A  51      70.712  -6.705  -3.314  1.00  0.00           H
ATOM    824  HA  ASP A  51      72.920  -5.307  -4.661  1.00  0.00           H
ATOM    825  HB2 ASP A  51      73.357  -6.423  -1.862  1.00  0.00           H
ATOM    826  HB3 ASP A  51      73.167  -4.717  -2.241  1.00  0.00           H
ATOM    827  N   THR A  52      72.816  -7.627  -5.666  1.00  0.00           N
ATOM    828  CA  THR A  52      72.904  -8.952  -6.274  1.00  0.00           C
ATOM    829  C   THR A  52      74.290  -9.579  -6.176  1.00  0.00           C
ATOM    830  O   THR A  52      74.430 -10.802  -6.217  1.00  0.00           O
ATOM    831  CB  THR A  52      72.486  -8.893  -7.756  1.00  0.00           C
ATOM    832  OG1 THR A  52      71.179  -8.315  -7.854  1.00  0.00           O
ATOM    833  CG2 THR A  52      72.470 -10.287  -8.368  1.00  0.00           C
ATOM    834  H   THR A  52      72.348  -6.908  -6.196  1.00  0.00           H
ATOM    835  HA  THR A  52      72.209  -9.609  -5.749  1.00  0.00           H
ATOM    836  HB  THR A  52      73.187  -8.269  -8.312  1.00  0.00           H
ATOM    837 HG21 THR A  52      71.987 -10.251  -9.344  1.00  0.00           H
ATOM    838 HG22 THR A  52      71.918 -10.974  -7.724  1.00  0.00           H
ATOM    839 HG23 THR A  52      73.484 -10.656  -8.519  1.00  0.00           H
ATOM    840  HG1 THR A  52      70.729  -8.725  -8.594  1.00  0.00           H
ATOM    841  N   GLN A  53      75.309  -8.736  -6.053  1.00  0.00           N
ATOM    842  CA  GLN A  53      76.694  -9.193  -5.970  1.00  0.00           C
ATOM    843  C   GLN A  53      76.941 -10.124  -4.782  1.00  0.00           C
ATOM    844  O   GLN A  53      77.836 -10.970  -4.816  1.00  0.00           O
ATOM    845  CB  GLN A  53      77.640  -7.990  -5.888  1.00  0.00           C
ATOM    846  CG  GLN A  53      79.108  -8.359  -5.800  1.00  0.00           C
ATOM    847  CD  GLN A  53      79.642  -8.948  -7.093  1.00  0.00           C
ATOM    848  OE1 GLN A  53      79.102  -8.703  -8.174  1.00  0.00           O
ATOM    849  NE2 GLN A  53      80.713  -9.728  -6.988  1.00  0.00           N
ATOM    850  H   GLN A  53      75.112  -7.762  -5.843  1.00  0.00           H
ATOM    851  HA  GLN A  53      76.923  -9.752  -6.878  1.00  0.00           H
ATOM    852  HB2 GLN A  53      77.393  -7.423  -4.990  1.00  0.00           H
ATOM    853  HB3 GLN A  53      77.473  -7.333  -6.743  1.00  0.00           H
ATOM    854  HG2 GLN A  53      79.313  -9.015  -4.957  1.00  0.00           H
ATOM    855  HG3 GLN A  53      79.669  -7.443  -5.613  1.00  0.00           H
ATOM    856 HE21 GLN A  53      81.059  -9.987  -6.080  1.00  0.00           H
ATOM    857 HE22 GLN A  53      81.024 -10.177  -7.828  1.00  0.00           H
ATOM    858  N   LYS A  54      76.150  -9.966  -3.728  1.00  0.00           N
ATOM    859  CA  LYS A  54      76.340 -10.777  -2.533  1.00  0.00           C
ATOM    860  C   LYS A  54      76.086 -12.260  -2.803  1.00  0.00           C
ATOM    861  O   LYS A  54      76.382 -13.107  -1.961  1.00  0.00           O
ATOM    862  CB  LYS A  54      75.469 -10.262  -1.384  1.00  0.00           C
ATOM    863  CG  LYS A  54      75.863  -8.866  -0.915  1.00  0.00           C
ATOM    864  CD  LYS A  54      75.118  -8.444   0.339  1.00  0.00           C
ATOM    865  CE  LYS A  54      75.748  -7.196   0.947  1.00  0.00           C
ATOM    866  NZ  LYS A  54      75.037  -6.740   2.174  1.00  0.00           N
ATOM    867  H   LYS A  54      75.446  -9.230  -3.729  1.00  0.00           H
ATOM    868  HA  LYS A  54      77.382 -10.714  -2.213  1.00  0.00           H
ATOM    869  HB2 LYS A  54      75.575 -10.949  -0.542  1.00  0.00           H
ATOM    870  HB3 LYS A  54      74.421 -10.259  -1.690  1.00  0.00           H
ATOM    871  HG2 LYS A  54      76.933  -8.869  -0.699  1.00  0.00           H
ATOM    872  HG3 LYS A  54      75.672  -8.140  -1.707  1.00  0.00           H
ATOM    873  HD2 LYS A  54      75.156  -9.252   1.072  1.00  0.00           H
ATOM    874  HD3 LYS A  54      74.075  -8.247   0.080  1.00  0.00           H
ATOM    875  HE2 LYS A  54      76.798  -7.402   1.173  1.00  0.00           H
ATOM    876  HE3 LYS A  54      75.719  -6.406   0.186  1.00  0.00           H
ATOM    877  HZ1 LYS A  54      75.159  -7.396   2.935  1.00  0.00           H
ATOM    878  HZ2 LYS A  54      75.363  -5.834   2.474  1.00  0.00           H
ATOM    879  HZ3 LYS A  54      74.032  -6.674   2.024  1.00  0.00           H
ATOM    880  N   LEU A  55      75.563 -12.572  -3.987  1.00  0.00           N
ATOM    881  CA  LEU A  55      75.255 -13.956  -4.347  1.00  0.00           C
ATOM    882  C   LEU A  55      76.355 -14.643  -5.139  1.00  0.00           C
ATOM    883  O   LEU A  55      76.238 -15.828  -5.457  1.00  0.00           O
ATOM    884  CB  LEU A  55      73.973 -14.027  -5.175  1.00  0.00           C
ATOM    885  CG  LEU A  55      72.649 -13.746  -4.472  1.00  0.00           C
ATOM    886  CD1 LEU A  55      71.497 -13.930  -5.451  1.00  0.00           C
ATOM    887  CD2 LEU A  55      72.484 -14.654  -3.264  1.00  0.00           C
ATOM    888  H   LEU A  55      75.259 -11.828  -4.603  1.00  0.00           H
ATOM    889  HA  LEU A  55      75.126 -14.555  -3.448  1.00  0.00           H
ATOM    890  HB2 LEU A  55      74.068 -13.356  -6.028  1.00  0.00           H
ATOM    891  HB3 LEU A  55      73.884 -15.035  -5.583  1.00  0.00           H
ATOM    892  HG  LEU A  55      72.667 -12.715  -4.138  1.00  0.00           H
ATOM    893 HD21 LEU A  55      71.513 -14.456  -2.817  1.00  0.00           H
ATOM    894 HD22 LEU A  55      72.540 -15.701  -3.567  1.00  0.00           H
ATOM    895 HD23 LEU A  55      73.238 -14.437  -2.510  1.00  0.00           H
ATOM    896 HD11 LEU A  55      70.561 -13.671  -4.956  1.00  0.00           H
ATOM    897 HD12 LEU A  55      71.633 -13.274  -6.309  1.00  0.00           H
ATOM    898 HD13 LEU A  55      71.451 -14.968  -5.785  1.00  0.00           H
ATOM    899  N   SER A  56      77.418 -13.908  -5.454  1.00  0.00           N
ATOM    900  CA  SER A  56      78.386 -14.364  -6.455  1.00  0.00           C
ATOM    901  C   SER A  56      79.115 -15.662  -6.100  1.00  0.00           C
ATOM    902  O   SER A  56      79.404 -16.473  -6.978  1.00  0.00           O
ATOM    903  CB  SER A  56      79.383 -13.251  -6.809  1.00  0.00           C
ATOM    904  OG  SER A  56      80.091 -12.805  -5.665  1.00  0.00           O
ATOM    905  H   SER A  56      77.423 -12.935  -5.172  1.00  0.00           H
ATOM    906  HA  SER A  56      77.828 -14.585  -7.366  1.00  0.00           H
ATOM    907  HB2 SER A  56      80.092 -13.630  -7.546  1.00  0.00           H
ATOM    908  HB3 SER A  56      78.844 -12.409  -7.246  1.00  0.00           H
ATOM    909  HG  SER A  56      79.496 -12.224  -5.166  1.00  0.00           H
ATOM    910  N   ALA A  57      79.408 -15.866  -4.821  1.00  0.00           N
ATOM    911  CA  ALA A  57      80.121 -17.075  -4.414  1.00  0.00           C
ATOM    912  C   ALA A  57      79.267 -18.340  -4.564  1.00  0.00           C
ATOM    913  O   ALA A  57      79.801 -19.439  -4.707  1.00  0.00           O
ATOM    914  CB  ALA A  57      80.649 -16.938  -2.996  1.00  0.00           C
ATOM    915  H   ALA A  57      79.198 -15.151  -4.146  1.00  0.00           H
ATOM    916  HA  ALA A  57      80.980 -17.205  -5.075  1.00  0.00           H
ATOM    917  HB1 ALA A  57      81.255 -17.812  -2.759  1.00  0.00           H
ATOM    918  HB2 ALA A  57      79.820 -16.874  -2.292  1.00  0.00           H
ATOM    919  HB3 ALA A  57      81.271 -16.047  -2.915  1.00  0.00           H
ATOM    920  N   GLU A  58      77.945 -18.176  -4.538  1.00  0.00           N
ATOM    921  CA  GLU A  58      77.013 -19.295  -4.683  1.00  0.00           C
ATOM    922  C   GLU A  58      75.629 -18.778  -5.083  1.00  0.00           C
ATOM    923  O   GLU A  58      74.861 -18.324  -4.240  1.00  0.00           O
ATOM    924  CB  GLU A  58      76.940 -20.113  -3.385  1.00  0.00           C
ATOM    925  CG  GLU A  58      75.943 -21.261  -3.415  1.00  0.00           C
ATOM    926  CD  GLU A  58      76.183 -22.228  -4.564  1.00  0.00           C
ATOM    927  OE1 GLU A  58      75.552 -22.057  -5.632  1.00  0.00           O
ATOM    928  OE2 GLU A  58      76.997 -23.164  -4.394  1.00  0.00           O
ATOM    929  H   GLU A  58      77.566 -17.242  -4.600  1.00  0.00           H
ATOM    930  HA  GLU A  58      77.399 -19.997  -5.419  1.00  0.00           H
ATOM    931  HB2 GLU A  58      77.926 -20.526  -3.167  1.00  0.00           H
ATOM    932  HB3 GLU A  58      76.676 -19.455  -2.559  1.00  0.00           H
ATOM    933  HG2 GLU A  58      74.929 -20.863  -3.472  1.00  0.00           H
ATOM    934  HG3 GLU A  58      76.016 -21.800  -2.468  1.00  0.00           H
ATOM    935  N   PRO A  59      75.316 -18.839  -6.385  1.00  0.00           N
ATOM    936  CA  PRO A  59      74.120 -18.201  -6.949  1.00  0.00           C
ATOM    937  C   PRO A  59      72.791 -18.846  -6.547  1.00  0.00           C
ATOM    938  O   PRO A  59      71.776 -18.156  -6.512  1.00  0.00           O
ATOM    939  CB  PRO A  59      74.330 -18.334  -8.467  1.00  0.00           C
ATOM    940  CG  PRO A  59      75.782 -18.628  -8.638  1.00  0.00           C
ATOM    941  CD  PRO A  59      76.181 -19.408  -7.429  1.00  0.00           C
ATOM    942  HA  PRO A  59      74.108 -17.149  -6.668  1.00  0.00           H
ATOM    943  HB2 PRO A  59      74.042 -17.420  -8.988  1.00  0.00           H
ATOM    944  HB3 PRO A  59      73.752 -19.177  -8.854  1.00  0.00           H
ATOM    945  HG2 PRO A  59      76.338 -17.689  -8.654  1.00  0.00           H
ATOM    946  HG3 PRO A  59      75.972 -19.190  -9.553  1.00  0.00           H
ATOM    947  HD2 PRO A  59      75.958 -20.467  -7.568  1.00  0.00           H
ATOM    948  HD3 PRO A  59      77.244 -19.245  -7.256  1.00  0.00           H
ATOM    949  N   GLU A  60      72.788 -20.143  -6.269  1.00  0.00           N
ATOM    950  CA  GLU A  60      71.542 -20.836  -5.965  1.00  0.00           C
ATOM    951  C   GLU A  60      71.278 -20.959  -4.460  1.00  0.00           C
ATOM    952  O   GLU A  60      72.203 -21.168  -3.677  1.00  0.00           O
ATOM    953  CB  GLU A  60      71.546 -22.227  -6.604  1.00  0.00           C
ATOM    954  CG  GLU A  60      71.791 -22.222  -8.111  1.00  0.00           C
ATOM    955  CD  GLU A  60      70.690 -21.512  -8.884  1.00  0.00           C
ATOM    956  OE1 GLU A  60      69.499 -21.807  -8.638  1.00  0.00           O
ATOM    957  OE2 GLU A  60      71.016 -20.662  -9.742  1.00  0.00           O
ATOM    958  H   GLU A  60      73.664 -20.656  -6.219  1.00  0.00           H
ATOM    959  HA  GLU A  60      70.707 -20.288  -6.406  1.00  0.00           H
ATOM    960  HB2 GLU A  60      72.333 -22.822  -6.137  1.00  0.00           H
ATOM    961  HB3 GLU A  60      70.596 -22.721  -6.393  1.00  0.00           H
ATOM    962  HG2 GLU A  60      72.764 -21.777  -8.332  1.00  0.00           H
ATOM    963  HG3 GLU A  60      71.833 -23.261  -8.447  1.00  0.00           H
ATOM    964  N   PHE A  61      70.009 -20.833  -4.072  1.00  0.00           N
ATOM    965  CA  PHE A  61      69.565 -21.106  -2.705  1.00  0.00           C
ATOM    966  C   PHE A  61      69.155 -22.570  -2.558  1.00  0.00           C
ATOM    967  O   PHE A  61      68.333 -23.058  -3.319  1.00  0.00           O
ATOM    968  CB  PHE A  61      68.353 -20.242  -2.344  1.00  0.00           C
ATOM    969  CG  PHE A  61      68.593 -18.767  -2.459  1.00  0.00           C
ATOM    970  CD1 PHE A  61      69.759 -18.200  -1.978  1.00  0.00           C
ATOM    971  CD2 PHE A  61      67.639 -17.943  -3.038  1.00  0.00           C
ATOM    972  CE1 PHE A  61      69.979 -16.837  -2.085  1.00  0.00           C
ATOM    973  CE2 PHE A  61      67.850 -16.583  -3.143  1.00  0.00           C
ATOM    974  CZ  PHE A  61      69.022 -16.027  -2.663  1.00  0.00           C
ATOM    975  H   PHE A  61      69.310 -20.655  -4.776  1.00  0.00           H
ATOM    976  HA  PHE A  61      70.366 -20.895  -2.000  1.00  0.00           H
ATOM    977  HB2 PHE A  61      67.521 -20.518  -2.995  1.00  0.00           H
ATOM    978  HB3 PHE A  61      68.065 -20.469  -1.323  1.00  0.00           H
ATOM    979  HD1 PHE A  61      70.516 -18.810  -1.506  1.00  0.00           H
ATOM    980  HD2 PHE A  61      66.730 -18.371  -3.431  1.00  0.00           H
ATOM    981  HE1 PHE A  61      70.901 -16.416  -1.711  1.00  0.00           H
ATOM    982  HE2 PHE A  61      67.118 -15.953  -3.625  1.00  0.00           H
ATOM    983  HZ  PHE A  61      69.202 -14.966  -2.766  1.00  0.00           H
ATOM    984  N   PHE A  62      69.703 -23.274  -1.575  1.00  0.00           N
ATOM    985  CA  PHE A  62      69.311 -24.666  -1.388  1.00  0.00           C
ATOM    986  C   PHE A  62      69.503 -25.172   0.034  1.00  0.00           C
ATOM    987  O   PHE A  62      70.294 -24.630   0.810  1.00  0.00           O
ATOM    988  CB  PHE A  62      70.055 -25.578  -2.368  1.00  0.00           C
ATOM    989  CG  PHE A  62      71.546 -25.434  -2.309  1.00  0.00           C
ATOM    990  CD1 PHE A  62      72.273 -26.019  -1.281  1.00  0.00           C
ATOM    991  CD2 PHE A  62      72.223 -24.697  -3.270  1.00  0.00           C
ATOM    992  CE1 PHE A  62      73.652 -25.872  -1.213  1.00  0.00           C
ATOM    993  CE2 PHE A  62      73.601 -24.552  -3.214  1.00  0.00           C
ATOM    994  CZ  PHE A  62      74.317 -25.141  -2.186  1.00  0.00           C
ATOM    995  H   PHE A  62      70.448 -22.884  -1.002  1.00  0.00           H
ATOM    996  HA  PHE A  62      68.243 -24.758  -1.593  1.00  0.00           H
ATOM    997  HB2 PHE A  62      69.791 -26.617  -2.170  1.00  0.00           H
ATOM    998  HB3 PHE A  62      69.718 -25.353  -3.380  1.00  0.00           H
ATOM    999  HD1 PHE A  62      71.773 -26.556  -0.488  1.00  0.00           H
ATOM   1000  HD2 PHE A  62      71.676 -24.186  -4.050  1.00  0.00           H
ATOM   1001  HE1 PHE A  62      74.208 -26.278  -0.376  1.00  0.00           H
ATOM   1002  HE2 PHE A  62      74.116 -23.938  -3.945  1.00  0.00           H
ATOM   1003  HZ  PHE A  62      75.387 -24.981  -2.113  1.00  0.00           H
ATOM   1004  N   ILE A  63      68.750 -26.216   0.361  1.00  0.00           N
ATOM   1005  CA  ILE A  63      68.969 -26.988   1.570  1.00  0.00           C
ATOM   1006  C   ILE A  63      69.158 -28.437   1.134  1.00  0.00           C
ATOM   1007  O   ILE A  63      68.336 -28.986   0.395  1.00  0.00           O
ATOM   1008  CB  ILE A  63      67.785 -26.869   2.560  1.00  0.00           C
ATOM   1009  CG1 ILE A  63      67.550 -25.401   2.945  1.00  0.00           C
ATOM   1010  CG2 ILE A  63      68.049 -27.707   3.807  1.00  0.00           C
ATOM   1011  CD1 ILE A  63      66.338 -25.168   3.852  1.00  0.00           C
ATOM   1012  H   ILE A  63      68.023 -26.527  -0.273  1.00  0.00           H
ATOM   1013  HA  ILE A  63      69.870 -26.644   2.078  1.00  0.00           H
ATOM   1014  HB  ILE A  63      66.888 -27.246   2.070  1.00  0.00           H
ATOM   1015 HG12 ILE A  63      67.376 -24.819   2.041  1.00  0.00           H
ATOM   1016 HG13 ILE A  63      68.442 -25.008   3.435  1.00  0.00           H
ATOM   1017 HG21 ILE A  63      68.213 -28.753   3.554  1.00  0.00           H
ATOM   1018 HG22 ILE A  63      68.933 -27.329   4.328  1.00  0.00           H
ATOM   1019 HG23 ILE A  63      67.198 -27.670   4.485  1.00  0.00           H
ATOM   1020 HD11 ILE A  63      66.172 -24.096   3.965  1.00  0.00           H
ATOM   1021 HD12 ILE A  63      65.449 -25.615   3.408  1.00  0.00           H
ATOM   1022 HD13 ILE A  63      66.506 -25.589   4.842  1.00  0.00           H
ATOM   1023  N   ARG A  64      70.257 -29.046   1.568  1.00  0.00           N
ATOM   1024  CA  ARG A  64      70.557 -30.431   1.221  1.00  0.00           C
ATOM   1025  C   ARG A  64      70.722 -31.278   2.469  1.00  0.00           C
ATOM   1026  O   ARG A  64      71.341 -30.856   3.451  1.00  0.00           O
ATOM   1027  CB  ARG A  64      71.848 -30.521   0.409  1.00  0.00           C
ATOM   1028  CG  ARG A  64      71.811 -29.894  -0.963  1.00  0.00           C
ATOM   1029  CD  ARG A  64      73.239 -29.781  -1.470  1.00  0.00           C
ATOM   1030  NE  ARG A  64      73.338 -29.113  -2.763  1.00  0.00           N
ATOM   1031  CZ  ARG A  64      74.473 -28.646  -3.272  1.00  0.00           C
ATOM   1032  NH1 ARG A  64      75.607 -28.768  -2.590  1.00  0.00           N
ATOM   1033  NH2 ARG A  64      74.472 -28.052  -4.459  1.00  0.00           N
ATOM   1034  H   ARG A  64      70.867 -28.553   2.223  1.00  0.00           H
ATOM   1035  HA  ARG A  64      69.749 -30.862   0.636  1.00  0.00           H
ATOM   1036  HB2 ARG A  64      72.636 -30.045   0.994  1.00  0.00           H
ATOM   1037  HB3 ARG A  64      72.121 -31.572   0.294  1.00  0.00           H
ATOM   1038  HG2 ARG A  64      71.214 -30.510  -1.636  1.00  0.00           H
ATOM   1039  HG3 ARG A  64      71.377 -28.896  -0.903  1.00  0.00           H
ATOM   1040  HD2 ARG A  64      73.813 -29.214  -0.730  1.00  0.00           H
ATOM   1041  HD3 ARG A  64      73.678 -30.779  -1.538  1.00  0.00           H
ATOM   1042  HE  ARG A  64      72.490 -28.863  -3.228  1.00  0.00           H
ATOM   1043 HH11 ARG A  64      76.446 -28.285  -2.868  1.00  0.00           H
ATOM   1044 HH12 ARG A  64      75.599 -29.089  -1.625  1.00  0.00           H
ATOM   1045 HH21 ARG A  64      75.342 -27.608  -4.712  1.00  0.00           H
ATOM   1046 HH22 ARG A  64      73.635 -27.589  -4.749  1.00  0.00           H
ATOM   1047  N   ILE A  65      70.184 -32.487   2.417  1.00  0.00           N
ATOM   1048  CA  ILE A  65      70.275 -33.414   3.533  1.00  0.00           C
ATOM   1049  C   ILE A  65      70.995 -34.663   3.061  1.00  0.00           C
ATOM   1050  O   ILE A  65      70.579 -35.304   2.096  1.00  0.00           O
ATOM   1051  CB  ILE A  65      68.883 -33.775   4.076  1.00  0.00           C
ATOM   1052  CG1 ILE A  65      68.187 -32.517   4.603  1.00  0.00           C
ATOM   1053  CG2 ILE A  65      68.990 -34.836   5.163  1.00  0.00           C
ATOM   1054  CD1 ILE A  65      66.697 -32.668   4.777  1.00  0.00           C
ATOM   1055  H   ILE A  65      69.662 -32.759   1.594  1.00  0.00           H
ATOM   1056  HA  ILE A  65      70.840 -32.972   4.350  1.00  0.00           H
ATOM   1057  HB  ILE A  65      68.292 -34.182   3.253  1.00  0.00           H
ATOM   1058 HG12 ILE A  65      68.316 -31.697   3.898  1.00  0.00           H
ATOM   1059 HG13 ILE A  65      68.636 -32.204   5.546  1.00  0.00           H
ATOM   1060 HD11 ILE A  65      66.246 -31.680   4.809  1.00  0.00           H
ATOM   1061 HD12 ILE A  65      66.272 -33.198   3.924  1.00  0.00           H
ATOM   1062 HD13 ILE A  65      66.474 -33.212   5.695  1.00  0.00           H
ATOM   1063 HG21 ILE A  65      68.018 -35.014   5.618  1.00  0.00           H
ATOM   1064 HG22 ILE A  65      69.349 -35.782   4.755  1.00  0.00           H
ATOM   1065 HG23 ILE A  65      69.680 -34.495   5.938  1.00  0.00           H
ATOM   1066  N   ILE A  66      72.089 -34.996   3.734  1.00  0.00           N
ATOM   1067  CA  ILE A  66      72.922 -36.106   3.307  1.00  0.00           C
ATOM   1068  C   ILE A  66      73.160 -37.091   4.441  1.00  0.00           C
ATOM   1069  O   ILE A  66      73.975 -36.839   5.323  1.00  0.00           O
ATOM   1070  CB  ILE A  66      74.288 -35.606   2.796  1.00  0.00           C
ATOM   1071  CG1 ILE A  66      74.096 -34.536   1.723  1.00  0.00           C
ATOM   1072  CG2 ILE A  66      75.112 -36.759   2.256  1.00  0.00           C
ATOM   1073  CD1 ILE A  66      74.653 -33.188   2.112  1.00  0.00           C
ATOM   1074  H   ILE A  66      72.396 -34.411   4.508  1.00  0.00           H
ATOM   1075  HA  ILE A  66      72.472 -36.629   2.469  1.00  0.00           H
ATOM   1076  HB  ILE A  66      74.845 -35.171   3.621  1.00  0.00           H
ATOM   1077 HG12 ILE A  66      74.620 -34.839   0.815  1.00  0.00           H
ATOM   1078 HG13 ILE A  66      73.056 -34.422   1.425  1.00  0.00           H
ATOM   1079 HD11 ILE A  66      74.515 -32.483   1.292  1.00  0.00           H
ATOM   1080 HD12 ILE A  66      75.718 -33.272   2.331  1.00  0.00           H
ATOM   1081 HD13 ILE A  66      74.131 -32.811   2.993  1.00  0.00           H
ATOM   1082 HG21 ILE A  66      75.341 -37.481   3.043  1.00  0.00           H
ATOM   1083 HG22 ILE A  66      76.064 -36.386   1.876  1.00  0.00           H
ATOM   1084 HG23 ILE A  66      74.584 -37.270   1.451  1.00  0.00           H
ATOM   1085  N   PRO A  67      72.443 -38.222   4.424  1.00  0.00           N
ATOM   1086  CA  PRO A  67      72.723 -39.276   5.399  1.00  0.00           C
ATOM   1087  C   PRO A  67      73.915 -40.076   4.904  1.00  0.00           C
ATOM   1088  O   PRO A  67      74.025 -40.306   3.699  1.00  0.00           O
ATOM   1089  CB  PRO A  67      71.467 -40.155   5.346  1.00  0.00           C
ATOM   1090  CG  PRO A  67      70.562 -39.541   4.292  1.00  0.00           C
ATOM   1091  CD  PRO A  67      71.398 -38.622   3.472  1.00  0.00           C
ATOM   1092  HA  PRO A  67      72.895 -38.884   6.402  1.00  0.00           H
ATOM   1093  HB2 PRO A  67      70.965 -40.140   6.311  1.00  0.00           H
ATOM   1094  HB3 PRO A  67      71.714 -41.184   5.076  1.00  0.00           H
ATOM   1095  HG2 PRO A  67      70.089 -40.305   3.674  1.00  0.00           H
ATOM   1096  HG3 PRO A  67      69.804 -38.945   4.790  1.00  0.00           H
ATOM   1097  HD2 PRO A  67      70.798 -37.781   3.127  1.00  0.00           H
ATOM   1098  HD3 PRO A  67      71.843 -39.157   2.631  1.00  0.00           H
ATOM   1099  N   ASP A  68      74.796 -40.487   5.809  1.00  0.00           N
ATOM   1100  CA  ASP A  68      75.954 -41.284   5.427  1.00  0.00           C
ATOM   1101  C   ASP A  68      76.061 -42.506   6.328  1.00  0.00           C
ATOM   1102  O   ASP A  68      76.453 -42.398   7.489  1.00  0.00           O
ATOM   1103  CB  ASP A  68      77.233 -40.446   5.494  1.00  0.00           C
ATOM   1104  CG  ASP A  68      78.444 -41.178   4.936  1.00  0.00           C
ATOM   1105  OD1 ASP A  68      78.348 -42.401   4.691  1.00  0.00           O
ATOM   1106  OD2 ASP A  68      79.494 -40.529   4.749  1.00  0.00           O
ATOM   1107  H   ASP A  68      74.783 -40.095   6.747  1.00  0.00           H
ATOM   1108  HA  ASP A  68      75.857 -41.630   4.397  1.00  0.00           H
ATOM   1109  HB2 ASP A  68      77.083 -39.536   4.909  1.00  0.00           H
ATOM   1110  HB3 ASP A  68      77.419 -40.155   6.524  1.00  0.00           H
ATOM   1111  N   LYS A  69      75.700 -43.664   5.786  1.00  0.00           N
ATOM   1112  CA  LYS A  69      75.683 -44.905   6.553  1.00  0.00           C
ATOM   1113  C   LYS A  69      77.080 -45.462   6.817  1.00  0.00           C
ATOM   1114  O   LYS A  69      77.246 -46.314   7.681  1.00  0.00           O
ATOM   1115  CB  LYS A  69      74.824 -45.959   5.847  1.00  0.00           C
ATOM   1116  CG  LYS A  69      73.326 -45.835   6.112  1.00  0.00           C
ATOM   1117  CD  LYS A  69      72.524 -46.716   5.156  1.00  0.00           C
ATOM   1118  CE  LYS A  69      71.398 -47.470   5.863  1.00  0.00           C
ATOM   1119  NZ  LYS A  69      70.237 -46.611   6.236  1.00  0.00           N
ATOM   1120  H   LYS A  69      75.467 -43.666   4.803  1.00  0.00           H
ATOM   1121  HA  LYS A  69      75.283 -44.719   7.549  1.00  0.00           H
ATOM   1122  HB2 LYS A  69      75.016 -45.901   4.773  1.00  0.00           H
ATOM   1123  HB3 LYS A  69      75.131 -46.952   6.182  1.00  0.00           H
ATOM   1124  HG2 LYS A  69      73.012 -44.798   5.983  1.00  0.00           H
ATOM   1125  HG3 LYS A  69      73.138 -46.124   7.148  1.00  0.00           H
ATOM   1126  HD2 LYS A  69      73.186 -47.468   4.722  1.00  0.00           H
ATOM   1127  HD3 LYS A  69      72.134 -46.111   4.335  1.00  0.00           H
ATOM   1128  HE2 LYS A  69      71.058 -48.266   5.195  1.00  0.00           H
ATOM   1129  HE3 LYS A  69      71.815 -47.945   6.757  1.00  0.00           H
ATOM   1130  HZ1 LYS A  69      69.520 -47.139   6.717  1.00  0.00           H
ATOM   1131  HZ2 LYS A  69      69.854 -46.147   5.423  1.00  0.00           H
ATOM   1132  HZ3 LYS A  69      70.549 -45.879   6.868  1.00  0.00           H
ATOM   1133  N   THR A  70      78.079 -44.981   6.081  1.00  0.00           N
ATOM   1134  CA  THR A  70      79.438 -45.502   6.226  1.00  0.00           C
ATOM   1135  C   THR A  70      80.143 -44.950   7.460  1.00  0.00           C
ATOM   1136  O   THR A  70      81.012 -45.609   8.027  1.00  0.00           O
ATOM   1137  CB  THR A  70      80.316 -45.215   4.988  1.00  0.00           C
ATOM   1138  OG1 THR A  70      80.626 -43.817   4.929  1.00  0.00           O
ATOM   1139  CG2 THR A  70      79.611 -45.651   3.700  1.00  0.00           C
ATOM   1140  H   THR A  70      77.926 -44.168   5.486  1.00  0.00           H
ATOM   1141  HA  THR A  70      79.390 -46.583   6.350  1.00  0.00           H
ATOM   1142  HB  THR A  70      81.248 -45.773   5.086  1.00  0.00           H
ATOM   1143  HG1 THR A  70      79.818 -43.277   4.763  1.00  0.00           H
ATOM   1144 HG21 THR A  70      80.297 -45.521   2.864  1.00  0.00           H
ATOM   1145 HG22 THR A  70      79.320 -46.698   3.770  1.00  0.00           H
ATOM   1146 HG23 THR A  70      78.732 -45.031   3.517  1.00  0.00           H
ATOM   1147  N   ASN A  71      79.784 -43.739   7.869  1.00  0.00           N
ATOM   1148  CA  ASN A  71      80.370 -43.160   9.075  1.00  0.00           C
ATOM   1149  C   ASN A  71      79.322 -42.654  10.065  1.00  0.00           C
ATOM   1150  O   ASN A  71      79.641 -41.924  11.005  1.00  0.00           O
ATOM   1151  CB  ASN A  71      81.379 -42.061   8.727  1.00  0.00           C
ATOM   1152  CG  ASN A  71      80.740 -40.882   8.028  1.00  0.00           C
ATOM   1153  OD1 ASN A  71      79.527 -40.846   7.829  1.00  0.00           O
ATOM   1154  ND2 ASN A  71      81.556 -39.904   7.653  1.00  0.00           N
ATOM   1155  H   ASN A  71      79.175 -43.162   7.298  1.00  0.00           H
ATOM   1156  HA  ASN A  71      80.911 -43.927   9.629  1.00  0.00           H
ATOM   1157  HB2 ASN A  71      82.143 -42.477   8.072  1.00  0.00           H
ATOM   1158  HB3 ASN A  71      81.858 -41.703   9.638  1.00  0.00           H
ATOM   1159 HD21 ASN A  71      81.123 -39.260   7.007  1.00  0.00           H
ATOM   1160 HD22 ASN A  71      82.544 -40.021   7.725  1.00  0.00           H
ATOM   1161  N   ASN A  72      78.072 -43.054   9.845  1.00  0.00           N
ATOM   1162  CA  ASN A  72      76.970 -42.719  10.746  1.00  0.00           C
ATOM   1163  C   ASN A  72      76.831 -41.231  11.040  1.00  0.00           C
ATOM   1164  O   ASN A  72      76.736 -40.814  12.197  1.00  0.00           O
ATOM   1165  CB  ASN A  72      77.074 -43.523  12.038  1.00  0.00           C
ATOM   1166  CG  ASN A  72      76.857 -45.001  11.804  1.00  0.00           C
ATOM   1167  OD1 ASN A  72      76.207 -45.393  10.833  1.00  0.00           O
ATOM   1168  ND2 ASN A  72      77.408 -45.828  12.676  1.00  0.00           N
ATOM   1169  H   ASN A  72      77.863 -43.579   9.011  1.00  0.00           H
ATOM   1170  HA  ASN A  72      76.054 -42.999  10.233  1.00  0.00           H
ATOM   1171  HB2 ASN A  72      76.305 -43.205  12.742  1.00  0.00           H
ATOM   1172  HB3 ASN A  72      78.042 -43.357  12.510  1.00  0.00           H
ATOM   1173 HD21 ASN A  72      77.153 -46.795  12.615  1.00  0.00           H
ATOM   1174 HD22 ASN A  72      77.776 -45.459  13.541  1.00  0.00           H
ATOM   1175  N   THR A  73      76.818 -40.435   9.977  1.00  0.00           N
ATOM   1176  CA  THR A  73      76.636 -39.003  10.106  1.00  0.00           C
ATOM   1177  C   THR A  73      75.445 -38.554   9.271  1.00  0.00           C
ATOM   1178  O   THR A  73      75.172 -39.105   8.205  1.00  0.00           O
ATOM   1179  CB  THR A  73      77.888 -38.217   9.658  1.00  0.00           C
ATOM   1180  OG1 THR A  73      78.070 -38.359   8.244  1.00  0.00           O
ATOM   1181  CG2 THR A  73      79.134 -38.715  10.386  1.00  0.00           C
ATOM   1182  H   THR A  73      76.901 -40.839   9.049  1.00  0.00           H
ATOM   1183  HA  THR A  73      76.442 -38.790  11.141  1.00  0.00           H
ATOM   1184  HB  THR A  73      77.739 -37.162   9.890  1.00  0.00           H
ATOM   1185  HG1 THR A  73      78.411 -39.253   8.070  1.00  0.00           H
ATOM   1186 HG21 THR A  73      79.972 -38.061  10.150  1.00  0.00           H
ATOM   1187 HG22 THR A  73      78.967 -38.704  11.462  1.00  0.00           H
ATOM   1188 HG23 THR A  73      79.382 -39.718  10.076  1.00  0.00           H
ATOM   1189  N   LEU A  74      74.732 -37.555   9.774  1.00  0.00           N
ATOM   1190  CA  LEU A  74      73.661 -36.921   9.022  1.00  0.00           C
ATOM   1191  C   LEU A  74      74.031 -35.459   8.830  1.00  0.00           C
ATOM   1192  O   LEU A  74      74.296 -34.747   9.796  1.00  0.00           O
ATOM   1193  CB  LEU A  74      72.333 -37.039   9.773  1.00  0.00           C
ATOM   1194  CG  LEU A  74      71.170 -36.263   9.155  1.00  0.00           C
ATOM   1195  CD1 LEU A  74      70.826 -36.828   7.768  1.00  0.00           C
ATOM   1196  CD2 LEU A  74      69.964 -36.287  10.073  1.00  0.00           C
ATOM   1197  H   LEU A  74      75.038 -37.141  10.650  1.00  0.00           H
ATOM   1198  HA  LEU A  74      73.558 -37.383   8.040  1.00  0.00           H
ATOM   1199  HB2 LEU A  74      72.488 -36.672  10.789  1.00  0.00           H
ATOM   1200  HB3 LEU A  74      72.063 -38.093   9.840  1.00  0.00           H
ATOM   1201  HG  LEU A  74      71.448 -35.216   9.037  1.00  0.00           H
ATOM   1202 HD21 LEU A  74      69.181 -35.648   9.667  1.00  0.00           H
ATOM   1203 HD22 LEU A  74      69.594 -37.309  10.161  1.00  0.00           H
ATOM   1204 HD23 LEU A  74      70.256 -35.927  11.057  1.00  0.00           H
ATOM   1205 HD11 LEU A  74      69.922 -36.351   7.399  1.00  0.00           H
ATOM   1206 HD12 LEU A  74      70.652 -37.902   7.839  1.00  0.00           H
ATOM   1207 HD13 LEU A  74      71.636 -36.633   7.067  1.00  0.00           H
ATOM   1208  N   THR A  75      74.062 -35.011   7.582  1.00  0.00           N
ATOM   1209  CA  THR A  75      74.508 -33.658   7.288  1.00  0.00           C
ATOM   1210  C   THR A  75      73.375 -32.763   6.772  1.00  0.00           C
ATOM   1211  O   THR A  75      72.611 -33.158   5.896  1.00  0.00           O
ATOM   1212  CB  THR A  75      75.654 -33.678   6.262  1.00  0.00           C
ATOM   1213  OG1 THR A  75      76.799 -34.311   6.845  1.00  0.00           O
ATOM   1214  CG2 THR A  75      76.015 -32.266   5.831  1.00  0.00           C
ATOM   1215  H   THR A  75      73.978 -35.675   6.817  1.00  0.00           H
ATOM   1216  HA  THR A  75      74.903 -33.203   8.185  1.00  0.00           H
ATOM   1217  HB  THR A  75      75.349 -34.242   5.387  1.00  0.00           H
ATOM   1218 HG21 THR A  75      76.923 -32.312   5.233  1.00  0.00           H
ATOM   1219 HG22 THR A  75      76.194 -31.641   6.706  1.00  0.00           H
ATOM   1220 HG23 THR A  75      75.230 -31.829   5.214  1.00  0.00           H
ATOM   1221  HG1 THR A  75      76.697 -34.296   7.798  1.00  0.00           H
ATOM   1222  N   ILE A  76      73.268 -31.562   7.337  1.00  0.00           N
ATOM   1223  CA  ILE A  76      72.302 -30.571   6.874  1.00  0.00           C
ATOM   1224  C   ILE A  76      73.094 -29.403   6.315  1.00  0.00           C
ATOM   1225  O   ILE A  76      73.784 -28.699   7.054  1.00  0.00           O
ATOM   1226  CB  ILE A  76      71.410 -30.040   8.016  1.00  0.00           C
ATOM   1227  CG1 ILE A  76      70.959 -31.168   8.948  1.00  0.00           C
ATOM   1228  CG2 ILE A  76      70.214 -29.284   7.453  1.00  0.00           C
ATOM   1229  CD1 ILE A  76      69.833 -32.001   8.403  1.00  0.00           C
ATOM   1230  H   ILE A  76      73.939 -31.286   8.049  1.00  0.00           H
ATOM   1231  HA  ILE A  76      71.665 -30.980   6.090  1.00  0.00           H
ATOM   1232  HB  ILE A  76      71.986 -29.351   8.636  1.00  0.00           H
ATOM   1233 HG12 ILE A  76      70.590 -30.702   9.862  1.00  0.00           H
ATOM   1234 HG13 ILE A  76      71.782 -31.810   9.260  1.00  0.00           H
ATOM   1235 HG21 ILE A  76      70.568 -28.374   6.961  1.00  0.00           H
ATOM   1236 HG22 ILE A  76      69.673 -29.879   6.719  1.00  0.00           H
ATOM   1237 HG23 ILE A  76      69.548 -28.981   8.261  1.00  0.00           H
ATOM   1238 HD11 ILE A  76      69.652 -32.836   9.080  1.00  0.00           H
ATOM   1239 HD12 ILE A  76      70.104 -32.402   7.427  1.00  0.00           H
ATOM   1240 HD13 ILE A  76      68.913 -31.422   8.329  1.00  0.00           H
ATOM   1241  N   GLU A  77      73.012 -29.209   5.006  1.00  0.00           N
ATOM   1242  CA  GLU A  77      73.799 -28.183   4.348  1.00  0.00           C
ATOM   1243  C   GLU A  77      72.880 -27.135   3.739  1.00  0.00           C
ATOM   1244  O   GLU A  77      71.810 -27.465   3.238  1.00  0.00           O
ATOM   1245  CB  GLU A  77      74.667 -28.814   3.259  1.00  0.00           C
ATOM   1246  CG  GLU A  77      75.429 -27.807   2.416  1.00  0.00           C
ATOM   1247  CD  GLU A  77      76.282 -28.467   1.350  1.00  0.00           C
ATOM   1248  OE1 GLU A  77      76.030 -29.652   1.035  1.00  0.00           O
ATOM   1249  OE2 GLU A  77      77.201 -27.799   0.825  1.00  0.00           O
ATOM   1250  H   GLU A  77      72.379 -29.768   4.448  1.00  0.00           H
ATOM   1251  HA  GLU A  77      74.449 -27.678   5.056  1.00  0.00           H
ATOM   1252  HB2 GLU A  77      74.012 -29.388   2.605  1.00  0.00           H
ATOM   1253  HB3 GLU A  77      75.358 -29.516   3.724  1.00  0.00           H
ATOM   1254  HG2 GLU A  77      74.727 -27.147   1.904  1.00  0.00           H
ATOM   1255  HG3 GLU A  77      76.064 -27.207   3.072  1.00  0.00           H
ATOM   1256  N   ASP A  78      73.293 -25.874   3.793  1.00  0.00           N
ATOM   1257  CA  ASP A  78      72.543 -24.803   3.150  1.00  0.00           C
ATOM   1258  C   ASP A  78      73.491 -23.811   2.490  1.00  0.00           C
ATOM   1259  O   ASP A  78      74.679 -23.770   2.803  1.00  0.00           O
ATOM   1260  CB  ASP A  78      71.631 -24.077   4.152  1.00  0.00           C
ATOM   1261  CG  ASP A  78      72.419 -23.288   5.198  1.00  0.00           C
ATOM   1262  OD1 ASP A  78      73.007 -22.237   4.854  1.00  0.00           O
ATOM   1263  OD2 ASP A  78      72.453 -23.722   6.371  1.00  0.00           O
ATOM   1264  H   ASP A  78      74.168 -25.641   4.259  1.00  0.00           H
ATOM   1265  HA  ASP A  78      71.924 -25.229   2.369  1.00  0.00           H
ATOM   1266  HB2 ASP A  78      70.980 -23.390   3.610  1.00  0.00           H
ATOM   1267  HB3 ASP A  78      71.002 -24.819   4.643  1.00  0.00           H
ATOM   1268  N   SER A  79      72.963 -23.015   1.568  1.00  0.00           N
ATOM   1269  CA  SER A  79      73.742 -21.937   0.981  1.00  0.00           C
ATOM   1270  C   SER A  79      73.227 -20.603   1.502  1.00  0.00           C
ATOM   1271  O   SER A  79      73.108 -19.640   0.752  1.00  0.00           O
ATOM   1272  CB  SER A  79      73.686 -21.981  -0.553  1.00  0.00           C
ATOM   1273  OG  SER A  79      72.353 -21.957  -1.016  1.00  0.00           O
ATOM   1274  H   SER A  79      71.999 -23.140   1.293  1.00  0.00           H
ATOM   1275  HA  SER A  79      74.787 -22.016   1.265  1.00  0.00           H
ATOM   1276  HB2 SER A  79      74.237 -21.134  -0.963  1.00  0.00           H
ATOM   1277  HB3 SER A  79      74.171 -22.893  -0.892  1.00  0.00           H
ATOM   1278  HG  SER A  79      72.416 -21.786  -1.977  1.00  0.00           H
ATOM   1279  N   GLY A  80      72.919 -20.561   2.796  1.00  0.00           N
ATOM   1280  CA  GLY A  80      72.472 -19.345   3.441  1.00  0.00           C
ATOM   1281  C   GLY A  80      73.594 -18.347   3.654  1.00  0.00           C
ATOM   1282  O   GLY A  80      74.654 -18.438   3.030  1.00  0.00           O
ATOM   1283  H   GLY A  80      73.076 -21.381   3.376  1.00  0.00           H
ATOM   1284  HA2 GLY A  80      71.699 -18.859   2.859  1.00  0.00           H
ATOM   1285  HA3 GLY A  80      72.053 -19.611   4.412  1.00  0.00           H
ATOM   1286  N   ILE A  81      73.370 -17.391   4.549  1.00  0.00           N
ATOM   1287  CA  ILE A  81      74.314 -16.287   4.716  1.00  0.00           C
ATOM   1288  C   ILE A  81      75.657 -16.714   5.316  1.00  0.00           C
ATOM   1289  O   ILE A  81      76.667 -16.036   5.137  1.00  0.00           O
ATOM   1290  CB  ILE A  81      73.703 -15.136   5.538  1.00  0.00           C
ATOM   1291  CG1 ILE A  81      74.546 -13.868   5.382  1.00  0.00           C
ATOM   1292  CG2 ILE A  81      73.557 -15.544   7.008  1.00  0.00           C
ATOM   1293  CD1 ILE A  81      73.790 -12.593   5.678  1.00  0.00           C
ATOM   1294  H   ILE A  81      72.462 -17.341   4.998  1.00  0.00           H
ATOM   1295  HA  ILE A  81      74.541 -15.905   3.721  1.00  0.00           H
ATOM   1296  HB  ILE A  81      72.709 -14.937   5.134  1.00  0.00           H
ATOM   1297 HG12 ILE A  81      75.416 -13.916   6.037  1.00  0.00           H
ATOM   1298 HG13 ILE A  81      74.904 -13.796   4.354  1.00  0.00           H
ATOM   1299 HD11 ILE A  81      74.448 -11.738   5.522  1.00  0.00           H
ATOM   1300 HD12 ILE A  81      72.932 -12.505   5.010  1.00  0.00           H
ATOM   1301 HD13 ILE A  81      73.447 -12.588   6.712  1.00  0.00           H
ATOM   1302 HG21 ILE A  81      72.994 -14.780   7.538  1.00  0.00           H
ATOM   1303 HG22 ILE A  81      73.023 -16.491   7.095  1.00  0.00           H
ATOM   1304 HG23 ILE A  81      74.528 -15.632   7.489  1.00  0.00           H
ATOM   1305  N   GLY A  82      75.674 -17.843   6.014  1.00  0.00           N
ATOM   1306  CA  GLY A  82      76.901 -18.328   6.622  1.00  0.00           C
ATOM   1307  C   GLY A  82      77.313 -17.524   7.847  1.00  0.00           C
ATOM   1308  O   GLY A  82      76.710 -16.495   8.165  1.00  0.00           O
ATOM   1309  H   GLY A  82      74.848 -18.427   6.074  1.00  0.00           H
ATOM   1310  HA2 GLY A  82      76.760 -19.365   6.923  1.00  0.00           H
ATOM   1311  HA3 GLY A  82      77.711 -18.300   5.896  1.00  0.00           H
ATOM   1312  N   MET A  83      78.347 -17.996   8.535  1.00  0.00           N
ATOM   1313  CA  MET A  83      78.840 -17.339   9.744  1.00  0.00           C
ATOM   1314  C   MET A  83      80.335 -17.065   9.646  1.00  0.00           C
ATOM   1315  O   MET A  83      81.107 -17.934   9.238  1.00  0.00           O
ATOM   1316  CB  MET A  83      78.570 -18.206  10.982  1.00  0.00           C
ATOM   1317  CG  MET A  83      77.099 -18.534  11.216  1.00  0.00           C
ATOM   1318  SD  MET A  83      76.833 -19.631  12.634  1.00  0.00           S
ATOM   1319  CE  MET A  83      77.007 -18.465  13.968  1.00  0.00           C
ATOM   1320  H   MET A  83      78.750 -18.892   8.283  1.00  0.00           H
ATOM   1321  HA  MET A  83      78.336 -16.382   9.893  1.00  0.00           H
ATOM   1322  HB2 MET A  83      79.001 -17.799  11.880  1.00  0.00           H
ATOM   1323  HB3 MET A  83      79.082 -19.157  10.827  1.00  0.00           H
ATOM   1324  HG2 MET A  83      76.709 -19.040  10.332  1.00  0.00           H
ATOM   1325  HG3 MET A  83      76.536 -17.611  11.358  1.00  0.00           H
ATOM   1326  HE1 MET A  83      77.422 -19.008  14.813  1.00  0.00           H
ATOM   1327  HE2 MET A  83      77.678 -17.679  13.680  1.00  0.00           H
ATOM   1328  HE3 MET A  83      76.011 -18.105  14.173  1.00  0.00           H
ATOM   1329  N   THR A  84      80.741 -15.857  10.022  1.00  0.00           N
ATOM   1330  CA  THR A  84      82.157 -15.542  10.147  1.00  0.00           C
ATOM   1331  C   THR A  84      82.708 -16.257  11.372  1.00  0.00           C
ATOM   1332  O   THR A  84      81.956 -16.857  12.141  1.00  0.00           O
ATOM   1333  CB  THR A  84      82.387 -14.040  10.345  1.00  0.00           C
ATOM   1334  OG1 THR A  84      81.825 -13.636  11.600  1.00  0.00           O
ATOM   1335  CG2 THR A  84      81.751 -13.233   9.208  1.00  0.00           C
ATOM   1336  H   THR A  84      80.048 -15.181  10.340  1.00  0.00           H
ATOM   1337  HA  THR A  84      82.702 -15.876   9.264  1.00  0.00           H
ATOM   1338  HB  THR A  84      83.458 -13.840  10.359  1.00  0.00           H
ATOM   1339  HG1 THR A  84      80.924 -13.318  11.414  1.00  0.00           H
ATOM   1340 HG21 THR A  84      82.023 -12.183   9.316  1.00  0.00           H
ATOM   1341 HG22 THR A  84      82.118 -13.584   8.245  1.00  0.00           H
ATOM   1342 HG23 THR A  84      80.664 -13.313   9.230  1.00  0.00           H
ATOM   1343  N   LYS A  85      84.021 -16.190  11.555  1.00  0.00           N
ATOM   1344  CA  LYS A  85      84.649 -16.765  12.736  1.00  0.00           C
ATOM   1345  C   LYS A  85      83.991 -16.203  13.986  1.00  0.00           C
ATOM   1346  O   LYS A  85      83.617 -16.948  14.892  1.00  0.00           O
ATOM   1347  CB  LYS A  85      86.147 -16.459  12.746  1.00  0.00           C
ATOM   1348  CG  LYS A  85      86.877 -16.924  13.993  1.00  0.00           C
ATOM   1349  CD  LYS A  85      88.332 -16.494  13.955  1.00  0.00           C
ATOM   1350  CE  LYS A  85      89.056 -16.841  15.244  1.00  0.00           C
ATOM   1351  NZ  LYS A  85      90.457 -16.322  15.237  1.00  0.00           N
ATOM   1352  H   LYS A  85      84.605 -15.710  10.865  1.00  0.00           H
ATOM   1353  HA  LYS A  85      84.496 -17.844  12.739  1.00  0.00           H
ATOM   1354  HB2 LYS A  85      86.596 -16.933  11.875  1.00  0.00           H
ATOM   1355  HB3 LYS A  85      86.284 -15.381  12.638  1.00  0.00           H
ATOM   1356  HG2 LYS A  85      86.419 -16.482  14.877  1.00  0.00           H
ATOM   1357  HG3 LYS A  85      86.819 -18.010  14.065  1.00  0.00           H
ATOM   1358  HD2 LYS A  85      88.364 -15.411  13.819  1.00  0.00           H
ATOM   1359  HD3 LYS A  85      88.840 -16.951  13.116  1.00  0.00           H
ATOM   1360  HE2 LYS A  85      88.510 -16.420  16.093  1.00  0.00           H
ATOM   1361  HE3 LYS A  85      89.066 -17.928  15.375  1.00  0.00           H
ATOM   1362  HZ1 LYS A  85      90.868 -16.666  16.118  1.00  0.00           H
ATOM   1363  HZ2 LYS A  85      90.482 -15.316  15.237  1.00  0.00           H
ATOM   1364  HZ3 LYS A  85      90.988 -16.719  14.479  1.00  0.00           H
ATOM   1365  N   ASN A  86      83.846 -14.883  14.028  1.00  0.00           N
ATOM   1366  CA  ASN A  86      83.229 -14.231  15.177  1.00  0.00           C
ATOM   1367  C   ASN A  86      81.790 -14.675  15.381  1.00  0.00           C
ATOM   1368  O   ASN A  86      81.352 -14.859  16.516  1.00  0.00           O
ATOM   1369  CB  ASN A  86      83.305 -12.711  15.046  1.00  0.00           C
ATOM   1370  CG  ASN A  86      84.690 -12.178  15.338  1.00  0.00           C
ATOM   1371  OD1 ASN A  86      85.460 -12.796  16.077  1.00  0.00           O
ATOM   1372  ND2 ASN A  86      85.020 -11.030  14.758  1.00  0.00           N
ATOM   1373  H   ASN A  86      84.076 -14.348  13.204  1.00  0.00           H
ATOM   1374  HA  ASN A  86      83.758 -14.537  16.082  1.00  0.00           H
ATOM   1375  HB2 ASN A  86      82.625 -12.255  15.765  1.00  0.00           H
ATOM   1376  HB3 ASN A  86      82.987 -12.415  14.045  1.00  0.00           H
ATOM   1377 HD21 ASN A  86      84.395 -10.622  14.084  1.00  0.00           H
ATOM   1378 HD22 ASN A  86      85.967 -10.725  14.876  1.00  0.00           H
ATOM   1379  N   ASP A  87      81.064 -14.849  14.277  1.00  0.00           N
ATOM   1380  CA  ASP A  87      79.696 -15.353  14.334  1.00  0.00           C
ATOM   1381  C   ASP A  87      79.626 -16.729  14.999  1.00  0.00           C
ATOM   1382  O   ASP A  87      78.766 -16.976  15.843  1.00  0.00           O
ATOM   1383  CB  ASP A  87      79.094 -15.436  12.930  1.00  0.00           C
ATOM   1384  CG  ASP A  87      78.848 -14.071  12.315  1.00  0.00           C
ATOM   1385  OD1 ASP A  87      78.859 -13.066  13.063  1.00  0.00           O
ATOM   1386  OD2 ASP A  87      78.637 -14.005  11.084  1.00  0.00           O
ATOM   1387  H   ASP A  87      81.458 -14.627  13.370  1.00  0.00           H
ATOM   1388  HA  ASP A  87      79.087 -14.674  14.934  1.00  0.00           H
ATOM   1389  HB2 ASP A  87      79.767 -15.977  12.299  1.00  0.00           H
ATOM   1390  HB3 ASP A  87      78.123 -15.913  12.963  1.00  0.00           H
ATOM   1391  N   LEU A  88      80.519 -17.632  14.606  1.00  0.00           N
ATOM   1392  CA  LEU A  88      80.527 -18.965  15.198  1.00  0.00           C
ATOM   1393  C   LEU A  88      80.753 -18.869  16.707  1.00  0.00           C
ATOM   1394  O   LEU A  88      80.076 -19.533  17.492  1.00  0.00           O
ATOM   1395  CB  LEU A  88      81.603 -19.842  14.559  1.00  0.00           C
ATOM   1396  CG  LEU A  88      81.424 -20.206  13.085  1.00  0.00           C
ATOM   1397  CD1 LEU A  88      82.726 -20.714  12.515  1.00  0.00           C
ATOM   1398  CD2 LEU A  88      80.322 -21.241  12.921  1.00  0.00           C
ATOM   1399  H   LEU A  88      81.166 -17.399  13.857  1.00  0.00           H
ATOM   1400  HA  LEU A  88      79.556 -19.435  15.048  1.00  0.00           H
ATOM   1401  HB2 LEU A  88      81.677 -20.769  15.129  1.00  0.00           H
ATOM   1402  HB3 LEU A  88      82.557 -19.327  14.670  1.00  0.00           H
ATOM   1403  HG  LEU A  88      81.141 -19.317  12.525  1.00  0.00           H
ATOM   1404 HD21 LEU A  88      79.380 -20.851  13.300  1.00  0.00           H
ATOM   1405 HD22 LEU A  88      80.569 -22.158  13.452  1.00  0.00           H
ATOM   1406 HD23 LEU A  88      80.192 -21.468  11.864  1.00  0.00           H
ATOM   1407 HD11 LEU A  88      82.582 -20.960  11.462  1.00  0.00           H
ATOM   1408 HD12 LEU A  88      83.051 -21.606  13.050  1.00  0.00           H
ATOM   1409 HD13 LEU A  88      83.486 -19.939  12.590  1.00  0.00           H
ATOM   1410  N   ILE A  89      81.708 -18.033  17.101  1.00  0.00           N
ATOM   1411  CA  ILE A  89      82.050 -17.854  18.510  1.00  0.00           C
ATOM   1412  C   ILE A  89      80.905 -17.203  19.280  1.00  0.00           C
ATOM   1413  O   ILE A  89      80.570 -17.626  20.383  1.00  0.00           O
ATOM   1414  CB  ILE A  89      83.332 -17.010  18.669  1.00  0.00           C
ATOM   1415  CG1 ILE A  89      84.523 -17.743  18.045  1.00  0.00           C
ATOM   1416  CG2 ILE A  89      83.601 -16.693  20.144  1.00  0.00           C
ATOM   1417  CD1 ILE A  89      85.710 -16.838  17.733  1.00  0.00           C
ATOM   1418  H   ILE A  89      82.223 -17.524  16.389  1.00  0.00           H
ATOM   1419  HA  ILE A  89      82.222 -18.834  18.955  1.00  0.00           H
ATOM   1420  HB  ILE A  89      83.189 -16.067  18.139  1.00  0.00           H
ATOM   1421 HG12 ILE A  89      84.847 -18.544  18.712  1.00  0.00           H
ATOM   1422 HG13 ILE A  89      84.233 -18.205  17.104  1.00  0.00           H
ATOM   1423 HG21 ILE A  89      82.828 -16.037  20.548  1.00  0.00           H
ATOM   1424 HG22 ILE A  89      83.643 -17.616  20.722  1.00  0.00           H
ATOM   1425 HG23 ILE A  89      84.549 -16.168  20.248  1.00  0.00           H
ATOM   1426 HD11 ILE A  89      86.488 -17.425  17.244  1.00  0.00           H
ATOM   1427 HD12 ILE A  89      85.399 -16.033  17.067  1.00  0.00           H
ATOM   1428 HD13 ILE A  89      86.119 -16.411  18.647  1.00  0.00           H
ATOM   1429  N   ASN A  90      80.289 -16.190  18.680  1.00  0.00           N
ATOM   1430  CA  ASN A  90      79.230 -15.450  19.352  1.00  0.00           C
ATOM   1431  C   ASN A  90      77.884 -16.156  19.367  1.00  0.00           C
ATOM   1432  O   ASN A  90      77.164 -16.088  20.360  1.00  0.00           O
ATOM   1433  CB  ASN A  90      79.071 -14.065  18.733  1.00  0.00           C
ATOM   1434  CG  ASN A  90      80.280 -13.188  18.966  1.00  0.00           C
ATOM   1435  OD1 ASN A  90      81.093 -13.455  19.851  1.00  0.00           O
ATOM   1436  ND2 ASN A  90      80.403 -12.133  18.176  1.00  0.00           N
ATOM   1437  H   ASN A  90      80.619 -15.874  17.775  1.00  0.00           H
ATOM   1438  HA  ASN A  90      79.509 -15.314  20.399  1.00  0.00           H
ATOM   1439  HB2 ASN A  90      78.906 -14.172  17.660  1.00  0.00           H
ATOM   1440  HB3 ASN A  90      78.202 -13.562  19.151  1.00  0.00           H
ATOM   1441 HD21 ASN A  90      79.798 -12.064  17.375  1.00  0.00           H
ATOM   1442 HD22 ASN A  90      81.270 -11.640  18.245  1.00  0.00           H
ATOM   1443  N   ASN A  91      77.539 -16.822  18.267  1.00  0.00           N
ATOM   1444  CA  ASN A  91      76.194 -17.369  18.106  1.00  0.00           C
ATOM   1445  C   ASN A  91      76.078 -18.814  18.559  1.00  0.00           C
ATOM   1446  O   ASN A  91      74.985 -19.287  18.861  1.00  0.00           O
ATOM   1447  CB  ASN A  91      75.734 -17.274  16.646  1.00  0.00           C
ATOM   1448  CG  ASN A  91      75.774 -15.863  16.105  1.00  0.00           C
ATOM   1449  OD1 ASN A  91      75.805 -14.894  16.858  1.00  0.00           O
ATOM   1450  ND2 ASN A  91      75.773 -15.742  14.783  1.00  0.00           N
ATOM   1451  H   ASN A  91      78.157 -16.804  17.464  1.00  0.00           H
ATOM   1452  HA  ASN A  91      75.495 -16.785  18.705  1.00  0.00           H
ATOM   1453  HB2 ASN A  91      76.440 -17.894  16.157  1.00  0.00           H
ATOM   1454  HB3 ASN A  91      74.741 -17.686  16.518  1.00  0.00           H
ATOM   1455 HD21 ASN A  91      75.772 -16.551  14.197  1.00  0.00           H
ATOM   1456 HD22 ASN A  91      75.896 -14.813  14.417  1.00  0.00           H
ATOM   1457  N   LEU A  92      77.207 -19.515  18.586  1.00  0.00           N
ATOM   1458  CA  LEU A  92      77.207 -20.935  18.915  1.00  0.00           C
ATOM   1459  C   LEU A  92      77.942 -21.293  20.206  1.00  0.00           C
ATOM   1460  O   LEU A  92      78.683 -22.273  20.239  1.00  0.00           O
ATOM   1461  CB  LEU A  92      77.770 -21.764  17.759  1.00  0.00           C
ATOM   1462  CG  LEU A  92      76.940 -21.797  16.476  1.00  0.00           C
ATOM   1463  CD1 LEU A  92      77.549 -22.779  15.489  1.00  0.00           C
ATOM   1464  CD2 LEU A  92      75.480 -22.153  16.773  1.00  0.00           C
ATOM   1465  H   LEU A  92      78.069 -19.100  18.250  1.00  0.00           H
ATOM   1466  HA  LEU A  92      76.188 -21.275  19.093  1.00  0.00           H
ATOM   1467  HB2 LEU A  92      77.809 -22.806  18.081  1.00  0.00           H
ATOM   1468  HB3 LEU A  92      78.788 -21.480  17.526  1.00  0.00           H
ATOM   1469  HG  LEU A  92      76.961 -20.808  16.023  1.00  0.00           H
ATOM   1470 HD11 LEU A  92      76.995 -22.740  14.550  1.00  0.00           H
ATOM   1471 HD12 LEU A  92      78.588 -22.515  15.296  1.00  0.00           H
ATOM   1472 HD13 LEU A  92      77.503 -23.792  15.891  1.00  0.00           H
ATOM   1473 HD21 LEU A  92      74.954 -22.328  15.834  1.00  0.00           H
ATOM   1474 HD22 LEU A  92      75.423 -23.057  17.376  1.00  0.00           H
ATOM   1475 HD23 LEU A  92      74.970 -21.331  17.270  1.00  0.00           H
ATOM   1476  N   GLY A  93      77.743 -20.515  21.266  1.00  0.00           N
ATOM   1477  CA  GLY A  93      78.217 -20.955  22.565  1.00  0.00           C
ATOM   1478  C   GLY A  93      78.508 -19.937  23.648  1.00  0.00           C
ATOM   1479  O   GLY A  93      78.126 -20.146  24.801  1.00  0.00           O
ATOM   1480  H   GLY A  93      77.111 -19.719  21.199  1.00  0.00           H
ATOM   1481  HA2 GLY A  93      77.463 -21.631  22.961  1.00  0.00           H
ATOM   1482  HA3 GLY A  93      79.137 -21.524  22.437  1.00  0.00           H
ATOM   1483  N   THR A  94      79.192 -18.850  23.301  1.00  0.00           N
ATOM   1484  CA  THR A  94      79.728 -17.948  24.325  1.00  0.00           C
ATOM   1485  C   THR A  94      78.698 -16.972  24.870  1.00  0.00           C
ATOM   1486  O   THR A  94      78.905 -16.367  25.920  1.00  0.00           O
ATOM   1487  CB  THR A  94      80.935 -17.152  23.812  1.00  0.00           C
ATOM   1488  OG1 THR A  94      80.557 -16.415  22.643  1.00  0.00           O
ATOM   1489  CG2 THR A  94      82.080 -18.089  23.468  1.00  0.00           C
ATOM   1490  H   THR A  94      79.436 -18.701  22.328  1.00  0.00           H
ATOM   1491  HA  THR A  94      80.072 -18.538  25.174  1.00  0.00           H
ATOM   1492  HB  THR A  94      81.266 -16.457  24.584  1.00  0.00           H
ATOM   1493  HG1 THR A  94      80.633 -16.969  21.840  1.00  0.00           H
ATOM   1494 HG21 THR A  94      82.932 -17.503  23.124  1.00  0.00           H
ATOM   1495 HG22 THR A  94      82.371 -18.660  24.349  1.00  0.00           H
ATOM   1496 HG23 THR A  94      81.774 -18.766  22.682  1.00  0.00           H
ATOM   1497  N   ILE A  95      77.587 -16.825  24.159  1.00  0.00           N
ATOM   1498  CA  ILE A  95      76.560 -15.872  24.556  1.00  0.00           C
ATOM   1499  C   ILE A  95      75.210 -16.545  24.781  1.00  0.00           C
ATOM   1500  O   ILE A  95      74.677 -17.200  23.882  1.00  0.00           O
ATOM   1501  CB  ILE A  95      76.409 -14.764  23.502  1.00  0.00           C
ATOM   1502  CG1 ILE A  95      77.720 -13.984  23.374  1.00  0.00           C
ATOM   1503  CG2 ILE A  95      75.254 -13.844  23.862  1.00  0.00           C
ATOM   1504  CD1 ILE A  95      77.773 -13.063  22.173  1.00  0.00           C
ATOM   1505  H   ILE A  95      77.467 -17.344  23.295  1.00  0.00           H
ATOM   1506  HA  ILE A  95      76.840 -15.383  25.489  1.00  0.00           H
ATOM   1507  HB  ILE A  95      76.180 -15.229  22.544  1.00  0.00           H
ATOM   1508 HG12 ILE A  95      77.900 -13.406  24.282  1.00  0.00           H
ATOM   1509 HG13 ILE A  95      78.552 -14.674  23.250  1.00  0.00           H
ATOM   1510 HD11 ILE A  95      78.793 -12.701  22.038  1.00  0.00           H
ATOM   1511 HD12 ILE A  95      77.116 -12.206  22.318  1.00  0.00           H
ATOM   1512 HD13 ILE A  95      77.465 -13.603  21.281  1.00  0.00           H
ATOM   1513 HG21 ILE A  95      75.184 -13.037  23.133  1.00  0.00           H
ATOM   1514 HG22 ILE A  95      74.302 -14.372  23.811  1.00  0.00           H
ATOM   1515 HG23 ILE A  95      75.397 -13.417  24.854  1.00  0.00           H
ATOM   1516  N   ALA A  96      74.667 -16.387  25.986  1.00  0.00           N
ATOM   1517  CA  ALA A  96      73.333 -16.893  26.297  1.00  0.00           C
ATOM   1518  C   ALA A  96      72.313 -15.787  26.093  1.00  0.00           C
ATOM   1519  O   ALA A  96      72.411 -14.724  26.696  1.00  0.00           O
ATOM   1520  CB  ALA A  96      73.269 -17.417  27.720  1.00  0.00           C
ATOM   1521  H   ALA A  96      75.153 -15.832  26.671  1.00  0.00           H
ATOM   1522  HA  ALA A  96      73.079 -17.719  25.628  1.00  0.00           H
ATOM   1523  HB1 ALA A  96      72.232 -17.452  28.056  1.00  0.00           H
ATOM   1524  HB2 ALA A  96      73.846 -16.786  28.397  1.00  0.00           H
ATOM   1525  HB3 ALA A  96      73.633 -18.436  27.706  1.00  0.00           H
ATOM   1526  N   ARG A  97      71.339 -16.035  25.231  1.00  0.00           N
ATOM   1527  CA  ARG A  97      70.358 -15.015  24.911  1.00  0.00           C
ATOM   1528  C   ARG A  97      69.246 -14.961  25.950  1.00  0.00           C
ATOM   1529  O   ARG A  97      69.135 -15.837  26.805  1.00  0.00           O
ATOM   1530  CB  ARG A  97      69.806 -15.229  23.500  1.00  0.00           C
ATOM   1531  CG  ARG A  97      70.712 -14.660  22.411  1.00  0.00           C
ATOM   1532  CD  ARG A  97      70.611 -15.435  21.104  1.00  0.00           C
ATOM   1533  NE  ARG A  97      69.229 -15.689  20.707  1.00  0.00           N
ATOM   1534  CZ  ARG A  97      68.873 -16.248  19.555  1.00  0.00           C
ATOM   1535  NH1 ARG A  97      69.798 -16.605  18.671  1.00  0.00           N
ATOM   1536  NH2 ARG A  97      67.592 -16.447  19.283  1.00  0.00           N
ATOM   1537  H   ARG A  97      71.357 -16.895  24.682  1.00  0.00           H
ATOM   1538  HA  ARG A  97      70.847 -14.039  24.926  1.00  0.00           H
ATOM   1539  HB2 ARG A  97      69.659 -16.300  23.348  1.00  0.00           H
ATOM   1540  HB3 ARG A  97      68.830 -14.755  23.395  1.00  0.00           H
ATOM   1541  HG2 ARG A  97      71.754 -14.703  22.733  1.00  0.00           H
ATOM   1542  HG3 ARG A  97      70.453 -13.615  22.236  1.00  0.00           H
ATOM   1543  HD2 ARG A  97      71.121 -16.392  21.229  1.00  0.00           H
ATOM   1544  HD3 ARG A  97      71.132 -14.876  20.322  1.00  0.00           H
ATOM   1545  HE  ARG A  97      68.493 -15.550  21.370  1.00  0.00           H
ATOM   1546 HH11 ARG A  97      69.513 -17.079  17.812  1.00  0.00           H
ATOM   1547 HH12 ARG A  97      70.739 -16.238  18.686  1.00  0.00           H
ATOM   1548 HH21 ARG A  97      67.372 -17.128  18.538  1.00  0.00           H
ATOM   1549 HH22 ARG A  97      66.894 -16.375  19.986  1.00  0.00           H
ATOM   1550  N   SER A  98      68.443 -13.907  25.879  1.00  0.00           N
ATOM   1551  CA  SER A  98      67.321 -13.709  26.786  1.00  0.00           C
ATOM   1552  C   SER A  98      66.412 -14.944  26.830  1.00  0.00           C
ATOM   1553  O   SER A  98      66.120 -15.477  27.900  1.00  0.00           O
ATOM   1554  CB  SER A  98      66.534 -12.462  26.352  1.00  0.00           C
ATOM   1555  OG  SER A  98      65.364 -12.270  27.124  1.00  0.00           O
ATOM   1556  H   SER A  98      68.597 -13.247  25.133  1.00  0.00           H
ATOM   1557  HA  SER A  98      67.689 -13.545  27.798  1.00  0.00           H
ATOM   1558  HB2 SER A  98      66.244 -12.570  25.305  1.00  0.00           H
ATOM   1559  HB3 SER A  98      67.172 -11.582  26.446  1.00  0.00           H
ATOM   1560  HG  SER A  98      64.799 -11.610  26.710  1.00  0.00           H
ATOM   1561  N   GLY A  99      65.979 -15.400  25.659  1.00  0.00           N
ATOM   1562  CA  GLY A  99      65.065 -16.524  25.571  1.00  0.00           C
ATOM   1563  C   GLY A  99      65.633 -17.777  26.208  1.00  0.00           C
ATOM   1564  O   GLY A  99      64.920 -18.536  26.868  1.00  0.00           O
ATOM   1565  H   GLY A  99      66.251 -14.947  24.803  1.00  0.00           H
ATOM   1566  HA2 GLY A  99      64.131 -16.277  26.077  1.00  0.00           H
ATOM   1567  HA3 GLY A  99      64.845 -16.738  24.526  1.00  0.00           H
ATOM   1568  N   THR A 100      66.926 -17.991  26.009  1.00  0.00           N
ATOM   1569  CA  THR A 100      67.595 -19.173  26.529  1.00  0.00           C
ATOM   1570  C   THR A 100      67.574 -19.175  28.056  1.00  0.00           C
ATOM   1571  O   THR A 100      67.293 -20.200  28.683  1.00  0.00           O
ATOM   1572  CB  THR A 100      69.044 -19.269  26.009  1.00  0.00           C
ATOM   1573  OG1 THR A 100      69.028 -19.541  24.601  1.00  0.00           O
ATOM   1574  CG2 THR A 100      69.795 -20.378  26.716  1.00  0.00           C
ATOM   1575  H   THR A 100      67.406 -17.438  25.317  1.00  0.00           H
ATOM   1576  HA  THR A 100      67.062 -20.064  26.192  1.00  0.00           H
ATOM   1577  HB  THR A 100      69.565 -18.328  26.184  1.00  0.00           H
ATOM   1578  HG1 THR A 100      69.931 -19.631  24.270  1.00  0.00           H
ATOM   1579 HG21 THR A 100      70.763 -20.519  26.236  1.00  0.00           H
ATOM   1580 HG22 THR A 100      69.970 -20.135  27.764  1.00  0.00           H
ATOM   1581 HG23 THR A 100      69.234 -21.312  26.641  1.00  0.00           H
ATOM   1582  N   LYS A 101      67.858 -18.023  28.653  1.00  0.00           N
ATOM   1583  CA  LYS A 101      67.852 -17.916  30.108  1.00  0.00           C
ATOM   1584  C   LYS A 101      66.441 -18.115  30.657  1.00  0.00           C
ATOM   1585  O   LYS A 101      66.249 -18.764  31.683  1.00  0.00           O
ATOM   1586  CB  LYS A 101      68.422 -16.571  30.556  1.00  0.00           C
ATOM   1587  CG  LYS A 101      69.826 -16.292  30.040  1.00  0.00           C
ATOM   1588  CD  LYS A 101      70.642 -15.503  31.055  1.00  0.00           C
ATOM   1589  CE  LYS A 101      71.635 -14.580  30.373  1.00  0.00           C
ATOM   1590  NZ  LYS A 101      70.932 -13.525  29.580  1.00  0.00           N
ATOM   1591  H   LYS A 101      68.053 -17.209  28.082  1.00  0.00           H
ATOM   1592  HA  LYS A 101      68.463 -18.714  30.538  1.00  0.00           H
ATOM   1593  HB2 LYS A 101      67.758 -15.762  30.246  1.00  0.00           H
ATOM   1594  HB3 LYS A 101      68.435 -16.591  31.649  1.00  0.00           H
ATOM   1595  HG2 LYS A 101      70.348 -17.229  29.838  1.00  0.00           H
ATOM   1596  HG3 LYS A 101      69.738 -15.743  29.112  1.00  0.00           H
ATOM   1597  HD2 LYS A 101      71.176 -16.205  31.701  1.00  0.00           H
ATOM   1598  HD3 LYS A 101      69.987 -14.903  31.690  1.00  0.00           H
ATOM   1599  HE2 LYS A 101      72.254 -14.125  31.152  1.00  0.00           H
ATOM   1600  HE3 LYS A 101      72.292 -15.176  29.731  1.00  0.00           H
ATOM   1601  HZ1 LYS A 101      71.044 -13.746  28.594  1.00  0.00           H
ATOM   1602  HZ2 LYS A 101      69.948 -13.526  29.812  1.00  0.00           H
ATOM   1603  HZ3 LYS A 101      71.337 -12.618  29.760  1.00  0.00           H
ATOM   1604  N   ALA A 102      65.457 -17.565  29.955  1.00  0.00           N
ATOM   1605  CA  ALA A 102      64.062 -17.714  30.347  1.00  0.00           C
ATOM   1606  C   ALA A 102      63.606 -19.169  30.252  1.00  0.00           C
ATOM   1607  O   ALA A 102      62.831 -19.639  31.088  1.00  0.00           O
ATOM   1608  CB  ALA A 102      63.180 -16.829  29.489  1.00  0.00           C
ATOM   1609  H   ALA A 102      65.682 -17.005  29.144  1.00  0.00           H
ATOM   1610  HA  ALA A 102      63.956 -17.405  31.390  1.00  0.00           H
ATOM   1611  HB1 ALA A 102      62.144 -16.920  29.818  1.00  0.00           H
ATOM   1612  HB2 ALA A 102      63.249 -17.125  28.442  1.00  0.00           H
ATOM   1613  HB3 ALA A 102      63.494 -15.790  29.590  1.00  0.00           H
ATOM   1614  N   PHE A 103      64.082 -19.873  29.228  1.00  0.00           N
ATOM   1615  CA  PHE A 103      63.723 -21.274  29.027  1.00  0.00           C
ATOM   1616  C   PHE A 103      64.254 -22.094  30.195  1.00  0.00           C
ATOM   1617  O   PHE A 103      63.528 -22.883  30.797  1.00  0.00           O
ATOM   1618  CB  PHE A 103      64.290 -21.804  27.694  1.00  0.00           C
ATOM   1619  CG  PHE A 103      64.043 -23.278  27.469  1.00  0.00           C
ATOM   1620  CD1 PHE A 103      62.930 -23.714  26.761  1.00  0.00           C
ATOM   1621  CD2 PHE A 103      64.922 -24.227  27.976  1.00  0.00           C
ATOM   1622  CE1 PHE A 103      62.696 -25.074  26.561  1.00  0.00           C
ATOM   1623  CE2 PHE A 103      64.694 -25.588  27.790  1.00  0.00           C
ATOM   1624  CZ  PHE A 103      63.583 -26.014  27.079  1.00  0.00           C
ATOM   1625  H   PHE A 103      64.630 -19.406  28.514  1.00  0.00           H
ATOM   1626  HA  PHE A 103      62.637 -21.376  29.012  1.00  0.00           H
ATOM   1627  HB2 PHE A 103      65.364 -21.622  27.654  1.00  0.00           H
ATOM   1628  HB3 PHE A 103      63.840 -21.241  26.875  1.00  0.00           H
ATOM   1629  HD1 PHE A 103      62.255 -22.990  26.328  1.00  0.00           H
ATOM   1630  HD2 PHE A 103      65.877 -23.851  28.284  1.00  0.00           H
ATOM   1631  HE1 PHE A 103      61.861 -25.390  25.958  1.00  0.00           H
ATOM   1632  HE2 PHE A 103      65.417 -26.323  28.102  1.00  0.00           H
ATOM   1633  HZ  PHE A 103      63.428 -27.066  26.892  1.00  0.00           H
ATOM   1634  N   MET A 104      65.526 -21.886  30.516  1.00  0.00           N
ATOM   1635  CA  MET A 104      66.182 -22.607  31.601  1.00  0.00           C
ATOM   1636  C   MET A 104      65.550 -22.354  32.960  1.00  0.00           C
ATOM   1637  O   MET A 104      65.370 -23.285  33.742  1.00  0.00           O
ATOM   1638  CB  MET A 104      67.676 -22.279  31.635  1.00  0.00           C
ATOM   1639  CG  MET A 104      68.460 -22.891  30.473  1.00  0.00           C
ATOM   1640  SD  MET A 104      68.621 -24.693  30.590  1.00  0.00           S
ATOM   1641  CE  MET A 104      66.996 -25.240  30.111  1.00  0.00           C
ATOM   1642  H   MET A 104      66.067 -21.225  29.967  1.00  0.00           H
ATOM   1643  HA  MET A 104      66.023 -23.660  31.564  1.00  0.00           H
ATOM   1644  HB2 MET A 104      67.805 -21.196  31.615  1.00  0.00           H
ATOM   1645  HB3 MET A 104      68.106 -22.650  32.567  1.00  0.00           H
ATOM   1646  HG2 MET A 104      69.464 -22.466  30.486  1.00  0.00           H
ATOM   1647  HG3 MET A 104      67.995 -22.626  29.523  1.00  0.00           H
ATOM   1648  HE1 MET A 104      67.106 -25.778  29.174  1.00  0.00           H
ATOM   1649  HE2 MET A 104      66.702 -25.948  30.875  1.00  0.00           H
ATOM   1650  HE3 MET A 104      66.277 -24.469  29.992  1.00  0.00           H
ATOM   1651  N   GLU A 105      65.205 -21.105  33.248  1.00  0.00           N
ATOM   1652  CA  GLU A 105      64.551 -20.814  34.520  1.00  0.00           C
ATOM   1653  C   GLU A 105      63.165 -21.455  34.567  1.00  0.00           C
ATOM   1654  O   GLU A 105      62.763 -22.020  35.581  1.00  0.00           O
ATOM   1655  CB  GLU A 105      64.484 -19.305  34.776  1.00  0.00           C
ATOM   1656  CG  GLU A 105      65.786 -18.727  35.323  1.00  0.00           C
ATOM   1657  CD  GLU A 105      65.885 -17.210  35.193  1.00  0.00           C
ATOM   1658  OE1 GLU A 105      64.960 -16.585  34.631  1.00  0.00           O
ATOM   1659  OE2 GLU A 105      66.899 -16.640  35.651  1.00  0.00           O
ATOM   1660  H   GLU A 105      65.441 -20.341  32.619  1.00  0.00           H
ATOM   1661  HA  GLU A 105      65.123 -21.259  35.333  1.00  0.00           H
ATOM   1662  HB2 GLU A 105      64.214 -18.823  33.835  1.00  0.00           H
ATOM   1663  HB3 GLU A 105      63.695 -19.099  35.501  1.00  0.00           H
ATOM   1664  HG2 GLU A 105      66.622 -19.172  34.778  1.00  0.00           H
ATOM   1665  HG3 GLU A 105      65.883 -19.018  36.372  1.00  0.00           H
ATOM   1666  N   ALA A 106      62.444 -21.383  33.456  1.00  0.00           N
ATOM   1667  CA  ALA A 106      61.108 -21.961  33.380  1.00  0.00           C
ATOM   1668  C   ALA A 106      61.116 -23.484  33.562  1.00  0.00           C
ATOM   1669  O   ALA A 106      60.319 -24.028  34.322  1.00  0.00           O
ATOM   1670  CB  ALA A 106      60.444 -21.584  32.063  1.00  0.00           C
ATOM   1671  H   ALA A 106      62.804 -20.875  32.654  1.00  0.00           H
ATOM   1672  HA  ALA A 106      60.506 -21.549  34.191  1.00  0.00           H
ATOM   1673  HB1 ALA A 106      60.215 -20.518  32.068  1.00  0.00           H
ATOM   1674  HB2 ALA A 106      59.519 -22.147  31.929  1.00  0.00           H
ATOM   1675  HB3 ALA A 106      61.126 -21.776  31.238  1.00  0.00           H
ATOM   1676  N   ILE A 107      62.015 -24.172  32.866  1.00  0.00           N
ATOM   1677  CA  ILE A 107      62.026 -25.628  32.918  1.00  0.00           C
ATOM   1678  C   ILE A 107      62.529 -26.127  34.269  1.00  0.00           C
ATOM   1679  O   ILE A 107      62.083 -27.160  34.760  1.00  0.00           O
ATOM   1680  CB  ILE A 107      62.837 -26.261  31.758  1.00  0.00           C
ATOM   1681  CG1 ILE A 107      62.436 -27.726  31.570  1.00  0.00           C
ATOM   1682  CG2 ILE A 107      64.336 -26.130  32.002  1.00  0.00           C
ATOM   1683  CD1 ILE A 107      63.028 -28.374  30.328  1.00  0.00           C
ATOM   1684  H   ILE A 107      62.616 -23.685  32.206  1.00  0.00           H
ATOM   1685  HA  ILE A 107      60.996 -25.971  32.817  1.00  0.00           H
ATOM   1686  HB  ILE A 107      62.586 -25.724  30.841  1.00  0.00           H
ATOM   1687 HG12 ILE A 107      61.350 -27.783  31.489  1.00  0.00           H
ATOM   1688 HG13 ILE A 107      62.738 -28.309  32.440  1.00  0.00           H
ATOM   1689 HG21 ILE A 107      64.814 -26.444  31.085  1.00  0.00           H
ATOM   1690 HG22 ILE A 107      64.675 -26.771  32.816  1.00  0.00           H
ATOM   1691 HG23 ILE A 107      64.587 -25.095  32.199  1.00  0.00           H
ATOM   1692 HD11 ILE A 107      62.674 -29.397  30.249  1.00  0.00           H
ATOM   1693 HD12 ILE A 107      64.112 -28.407  30.399  1.00  0.00           H
ATOM   1694 HD13 ILE A 107      62.732 -27.819  29.438  1.00  0.00           H
ATOM   1695  N   GLN A 108      63.444 -25.386  34.879  1.00  0.00           N
ATOM   1696  CA  GLN A 108      63.932 -25.754  36.205  1.00  0.00           C
ATOM   1697  C   GLN A 108      62.858 -25.564  37.275  1.00  0.00           C
ATOM   1698  O   GLN A 108      62.787 -26.325  38.236  1.00  0.00           O
ATOM   1699  CB  GLN A 108      65.205 -24.978  36.550  1.00  0.00           C
ATOM   1700  CG  GLN A 108      66.442 -25.521  35.841  1.00  0.00           C
ATOM   1701  CD  GLN A 108      67.574 -24.515  35.761  1.00  0.00           C
ATOM   1702  OE1 GLN A 108      68.699 -24.859  35.393  1.00  0.00           O
ATOM   1703  NE2 GLN A 108      67.283 -23.264  36.101  1.00  0.00           N
ATOM   1704  H   GLN A 108      63.818 -24.565  34.415  1.00  0.00           H
ATOM   1705  HA  GLN A 108      64.177 -26.818  36.207  1.00  0.00           H
ATOM   1706  HB2 GLN A 108      64.981 -23.944  36.293  1.00  0.00           H
ATOM   1707  HB3 GLN A 108      65.382 -25.029  37.626  1.00  0.00           H
ATOM   1708  HG2 GLN A 108      66.790 -26.417  36.355  1.00  0.00           H
ATOM   1709  HG3 GLN A 108      66.181 -25.787  34.817  1.00  0.00           H
ATOM   1710 HE21 GLN A 108      66.319 -22.992  36.144  1.00  0.00           H
ATOM   1711 HE22 GLN A 108      68.006 -22.590  35.925  1.00  0.00           H
ATOM   1712  N   ALA A 109      62.010 -24.559  37.093  1.00  0.00           N
ATOM   1713  CA  ALA A 109      60.923 -24.312  38.029  1.00  0.00           C
ATOM   1714  C   ALA A 109      59.780 -25.312  37.864  1.00  0.00           C
ATOM   1715  O   ALA A 109      59.188 -25.745  38.846  1.00  0.00           O
ATOM   1716  CB  ALA A 109      60.407 -22.890  37.877  1.00  0.00           C
ATOM   1717  H   ALA A 109      62.153 -23.911  36.325  1.00  0.00           H
ATOM   1718  HA  ALA A 109      61.302 -24.424  39.046  1.00  0.00           H
ATOM   1719  HB1 ALA A 109      59.612 -22.707  38.600  1.00  0.00           H
ATOM   1720  HB2 ALA A 109      61.220 -22.184  38.053  1.00  0.00           H
ATOM   1721  HB3 ALA A 109      60.020 -22.737  36.868  1.00  0.00           H
ATOM   1722  N   SER A 110      59.471 -25.678  36.623  1.00  0.00           N
ATOM   1723  CA  SER A 110      58.317 -26.531  36.345  1.00  0.00           C
ATOM   1724  C   SER A 110      58.671 -28.012  36.222  1.00  0.00           C
ATOM   1725  O   SER A 110      57.822 -28.878  36.441  1.00  0.00           O
ATOM   1726  CB  SER A 110      57.610 -26.078  35.064  1.00  0.00           C
ATOM   1727  OG  SER A 110      58.312 -26.526  33.914  1.00  0.00           O
ATOM   1728  H   SER A 110      59.960 -25.245  35.846  1.00  0.00           H
ATOM   1729  HA  SER A 110      57.595 -26.443  37.157  1.00  0.00           H
ATOM   1730  HB2 SER A 110      56.611 -26.517  35.045  1.00  0.00           H
ATOM   1731  HB3 SER A 110      57.516 -24.991  35.050  1.00  0.00           H
ATOM   1732  HG  SER A 110      58.718 -25.765  33.479  1.00  0.00           H
ATOM   1733  N   GLY A 111      59.916 -28.297  35.849  1.00  0.00           N
ATOM   1734  CA  GLY A 111      60.347 -29.663  35.607  1.00  0.00           C
ATOM   1735  C   GLY A 111      59.653 -30.292  34.408  1.00  0.00           C
ATOM   1736  O   GLY A 111      59.801 -31.487  34.151  1.00  0.00           O
ATOM   1737  H   GLY A 111      60.562 -27.547  35.641  1.00  0.00           H
ATOM   1738  HA2 GLY A 111      60.136 -30.272  36.485  1.00  0.00           H
ATOM   1739  HA3 GLY A 111      61.420 -29.668  35.420  1.00  0.00           H
ATOM   1740  N   ASP A 112      58.896 -29.482  33.671  1.00  0.00           N
ATOM   1741  CA  ASP A 112      58.115 -29.965  32.534  1.00  0.00           C
ATOM   1742  C   ASP A 112      58.979 -30.107  31.279  1.00  0.00           C
ATOM   1743  O   ASP A 112      59.243 -29.125  30.577  1.00  0.00           O
ATOM   1744  CB  ASP A 112      56.949 -29.014  32.264  1.00  0.00           C
ATOM   1745  CG  ASP A 112      56.051 -29.494  31.141  1.00  0.00           C
ATOM   1746  OD1 ASP A 112      56.195 -30.662  30.712  1.00  0.00           O
ATOM   1747  OD2 ASP A 112      55.195 -28.698  30.695  1.00  0.00           O
ATOM   1748  H   ASP A 112      58.814 -28.503  33.917  1.00  0.00           H
ATOM   1749  HA  ASP A 112      57.693 -30.941  32.780  1.00  0.00           H
ATOM   1750  HB2 ASP A 112      56.351 -28.923  33.172  1.00  0.00           H
ATOM   1751  HB3 ASP A 112      57.331 -28.026  32.007  1.00  0.00           H
ATOM   1752  N   ILE A 113      59.415 -31.329  30.989  1.00  0.00           N
ATOM   1753  CA  ILE A 113      60.378 -31.522  29.907  1.00  0.00           C
ATOM   1754  C   ILE A 113      59.747 -31.444  28.515  1.00  0.00           C
ATOM   1755  O   ILE A 113      60.455 -31.331  27.513  1.00  0.00           O
ATOM   1756  CB  ILE A 113      61.173 -32.830  30.057  1.00  0.00           C
ATOM   1757  CG1 ILE A 113      60.290 -34.026  29.718  1.00  0.00           C
ATOM   1758  CG2 ILE A 113      61.755 -32.946  31.471  1.00  0.00           C
ATOM   1759  CD1 ILE A 113      61.070 -35.286  29.457  1.00  0.00           C
ATOM   1760  H   ILE A 113      59.268 -32.055  31.675  1.00  0.00           H
ATOM   1761  HA  ILE A 113      61.094 -30.707  29.957  1.00  0.00           H
ATOM   1762  HB  ILE A 113      62.001 -32.791  29.346  1.00  0.00           H
ATOM   1763 HG12 ILE A 113      59.721 -33.860  28.808  1.00  0.00           H
ATOM   1764 HG13 ILE A 113      59.576 -34.203  30.524  1.00  0.00           H
ATOM   1765 HD11 ILE A 113      60.403 -36.059  29.074  1.00  0.00           H
ATOM   1766 HD12 ILE A 113      61.524 -35.643  30.381  1.00  0.00           H
ATOM   1767 HD13 ILE A 113      61.852 -35.093  28.737  1.00  0.00           H
ATOM   1768 HG21 ILE A 113      62.462 -33.773  31.519  1.00  0.00           H
ATOM   1769 HG22 ILE A 113      60.970 -33.113  32.210  1.00  0.00           H
ATOM   1770 HG23 ILE A 113      62.284 -32.027  31.728  1.00  0.00           H
ATOM   1771  N   SER A 114      58.421 -31.490  28.453  1.00  0.00           N
ATOM   1772  CA  SER A 114      57.730 -31.285  27.183  1.00  0.00           C
ATOM   1773  C   SER A 114      57.992 -29.870  26.650  1.00  0.00           C
ATOM   1774  O   SER A 114      57.714 -29.574  25.490  1.00  0.00           O
ATOM   1775  CB  SER A 114      56.226 -31.553  27.322  1.00  0.00           C
ATOM   1776  OG  SER A 114      55.585 -30.522  28.051  1.00  0.00           O
ATOM   1777  H   SER A 114      57.884 -31.439  29.316  1.00  0.00           H
ATOM   1778  HA  SER A 114      58.131 -31.987  26.456  1.00  0.00           H
ATOM   1779  HB2 SER A 114      55.784 -31.593  26.326  1.00  0.00           H
ATOM   1780  HB3 SER A 114      56.062 -32.511  27.817  1.00  0.00           H
ATOM   1781  HG  SER A 114      55.751 -30.567  29.023  1.00  0.00           H
ATOM   1782  N   MET A 115      58.538 -29.002  27.498  1.00  0.00           N
ATOM   1783  CA  MET A 115      58.940 -27.661  27.066  1.00  0.00           C
ATOM   1784  C   MET A 115      59.956 -27.710  25.935  1.00  0.00           C
ATOM   1785  O   MET A 115      60.010 -26.812  25.088  1.00  0.00           O
ATOM   1786  CB  MET A 115      59.537 -26.874  28.226  1.00  0.00           C
ATOM   1787  CG  MET A 115      58.523 -26.371  29.232  1.00  0.00           C
ATOM   1788  SD  MET A 115      59.344 -25.353  30.468  1.00  0.00           S
ATOM   1789  CE  MET A 115      60.222 -24.186  29.430  1.00  0.00           C
ATOM   1790  H   MET A 115      58.616 -29.236  28.483  1.00  0.00           H
ATOM   1791  HA  MET A 115      58.062 -27.128  26.701  1.00  0.00           H
ATOM   1792  HB2 MET A 115      60.289 -27.479  28.735  1.00  0.00           H
ATOM   1793  HB3 MET A 115      60.045 -26.031  27.770  1.00  0.00           H
ATOM   1794  HG2 MET A 115      58.017 -27.204  29.718  1.00  0.00           H
ATOM   1795  HG3 MET A 115      57.773 -25.775  28.719  1.00  0.00           H
ATOM   1796  HE1 MET A 115      60.595 -23.376  30.043  1.00  0.00           H
ATOM   1797  HE2 MET A 115      59.557 -23.776  28.672  1.00  0.00           H
ATOM   1798  HE3 MET A 115      61.087 -24.660  28.968  1.00  0.00           H
ATOM   1799  N   ILE A 116      60.781 -28.750  25.942  1.00  0.00           N
ATOM   1800  CA  ILE A 116      61.784 -28.923  24.905  1.00  0.00           C
ATOM   1801  C   ILE A 116      61.112 -28.885  23.537  1.00  0.00           C
ATOM   1802  O   ILE A 116      61.634 -28.307  22.587  1.00  0.00           O
ATOM   1803  CB  ILE A 116      62.536 -30.253  25.079  1.00  0.00           C
ATOM   1804  CG1 ILE A 116      63.391 -30.214  26.349  1.00  0.00           C
ATOM   1805  CG2 ILE A 116      63.408 -30.539  23.865  1.00  0.00           C
ATOM   1806  CD1 ILE A 116      63.995 -31.549  26.712  1.00  0.00           C
ATOM   1807  H   ILE A 116      60.694 -29.450  26.671  1.00  0.00           H
ATOM   1808  HA  ILE A 116      62.497 -28.097  24.940  1.00  0.00           H
ATOM   1809  HB  ILE A 116      61.806 -31.060  25.168  1.00  0.00           H
ATOM   1810 HG12 ILE A 116      64.192 -29.482  26.229  1.00  0.00           H
ATOM   1811 HG13 ILE A 116      62.777 -29.898  27.193  1.00  0.00           H
ATOM   1812 HD11 ILE A 116      64.462 -31.472  27.695  1.00  0.00           H
ATOM   1813 HD12 ILE A 116      63.217 -32.312  26.752  1.00  0.00           H
ATOM   1814 HD13 ILE A 116      64.763 -31.840  25.997  1.00  0.00           H
ATOM   1815 HG21 ILE A 116      62.784 -30.691  22.991  1.00  0.00           H
ATOM   1816 HG22 ILE A 116      64.094 -29.710  23.682  1.00  0.00           H
ATOM   1817 HG23 ILE A 116      63.979 -31.455  23.995  1.00  0.00           H
ATOM   1818  N   GLY A 117      59.940 -29.497  23.448  1.00  0.00           N
ATOM   1819  CA  GLY A 117      59.197 -29.518  22.205  1.00  0.00           C
ATOM   1820  C   GLY A 117      58.346 -28.277  22.016  1.00  0.00           C
ATOM   1821  O   GLY A 117      58.259 -27.739  20.912  1.00  0.00           O
ATOM   1822  H   GLY A 117      59.516 -29.854  24.292  1.00  0.00           H
ATOM   1823  HA2 GLY A 117      59.881 -29.610  21.359  1.00  0.00           H
ATOM   1824  HA3 GLY A 117      58.527 -30.374  22.209  1.00  0.00           H
ATOM   1825  N   GLN A 118      57.722 -27.811  23.094  1.00  0.00           N
ATOM   1826  CA  GLN A 118      56.839 -26.653  23.005  1.00  0.00           C
ATOM   1827  C   GLN A 118      57.581 -25.366  22.637  1.00  0.00           C
ATOM   1828  O   GLN A 118      57.133 -24.614  21.775  1.00  0.00           O
ATOM   1829  CB  GLN A 118      56.045 -26.455  24.303  1.00  0.00           C
ATOM   1830  CG  GLN A 118      55.003 -25.352  24.203  1.00  0.00           C
ATOM   1831  CD  GLN A 118      54.173 -25.190  25.469  1.00  0.00           C
ATOM   1832  OE1 GLN A 118      54.386 -25.888  26.465  1.00  0.00           O
ATOM   1833  NE2 GLN A 118      53.221 -24.262  25.434  1.00  0.00           N
ATOM   1834  H   GLN A 118      57.814 -28.292  23.982  1.00  0.00           H
ATOM   1835  HA  GLN A 118      56.122 -26.837  22.204  1.00  0.00           H
ATOM   1836  HB2 GLN A 118      55.541 -27.392  24.546  1.00  0.00           H
ATOM   1837  HB3 GLN A 118      56.736 -26.217  25.112  1.00  0.00           H
ATOM   1838  HG2 GLN A 118      54.331 -25.568  23.372  1.00  0.00           H
ATOM   1839  HG3 GLN A 118      55.495 -24.399  24.007  1.00  0.00           H
ATOM   1840 HE21 GLN A 118      53.141 -23.658  24.639  1.00  0.00           H
ATOM   1841 HE22 GLN A 118      52.720 -24.130  26.294  1.00  0.00           H
ATOM   1842  N   PHE A 119      58.713 -25.113  23.286  1.00  0.00           N
ATOM   1843  CA  PHE A 119      59.432 -23.858  23.076  1.00  0.00           C
ATOM   1844  C   PHE A 119      60.721 -24.025  22.275  1.00  0.00           C
ATOM   1845  O   PHE A 119      61.267 -23.050  21.755  1.00  0.00           O
ATOM   1846  CB  PHE A 119      59.705 -23.170  24.415  1.00  0.00           C
ATOM   1847  CG  PHE A 119      58.461 -22.914  25.215  1.00  0.00           C
ATOM   1848  CD1 PHE A 119      58.144 -23.707  26.305  1.00  0.00           C
ATOM   1849  CD2 PHE A 119      57.585 -21.903  24.849  1.00  0.00           C
ATOM   1850  CE1 PHE A 119      56.986 -23.477  27.036  1.00  0.00           C
ATOM   1851  CE2 PHE A 119      56.429 -21.669  25.568  1.00  0.00           C
ATOM   1852  CZ  PHE A 119      56.125 -22.459  26.667  1.00  0.00           C
ATOM   1853  H   PHE A 119      59.051 -25.756  23.990  1.00  0.00           H
ATOM   1854  HA  PHE A 119      58.823 -23.168  22.491  1.00  0.00           H
ATOM   1855  HB2 PHE A 119      60.388 -23.791  24.994  1.00  0.00           H
ATOM   1856  HB3 PHE A 119      60.204 -22.217  24.229  1.00  0.00           H
ATOM   1857  HD1 PHE A 119      58.800 -24.516  26.581  1.00  0.00           H
ATOM   1858  HD2 PHE A 119      57.815 -21.288  23.990  1.00  0.00           H
ATOM   1859  HE1 PHE A 119      56.736 -24.104  27.880  1.00  0.00           H
ATOM   1860  HE2 PHE A 119      55.764 -20.872  25.271  1.00  0.00           H
ATOM   1861  HZ  PHE A 119      55.220 -22.287  27.232  1.00  0.00           H
ATOM   1862  N   GLY A 120      61.200 -25.261  22.173  1.00  0.00           N
ATOM   1863  CA  GLY A 120      62.401 -25.556  21.409  1.00  0.00           C
ATOM   1864  C   GLY A 120      63.692 -25.268  22.156  1.00  0.00           C
ATOM   1865  O   GLY A 120      63.708 -24.506  23.127  1.00  0.00           O
ATOM   1866  H   GLY A 120      60.753 -26.013  22.670  1.00  0.00           H
ATOM   1867  HA2 GLY A 120      62.410 -24.958  20.495  1.00  0.00           H
ATOM   1868  HA3 GLY A 120      62.396 -26.597  21.094  1.00  0.00           H
ATOM   1869  N   VAL A 121      64.778 -25.892  21.705  1.00  0.00           N
ATOM   1870  CA  VAL A 121      66.107 -25.633  22.250  1.00  0.00           C
ATOM   1871  C   VAL A 121      67.082 -25.293  21.124  1.00  0.00           C
ATOM   1872  O   VAL A 121      68.298 -25.316  21.303  1.00  0.00           O
ATOM   1873  CB  VAL A 121      66.643 -26.831  23.060  1.00  0.00           C
ATOM   1874  CG1 VAL A 121      65.825 -27.019  24.330  1.00  0.00           C
ATOM   1875  CG2 VAL A 121      66.638 -28.095  22.209  1.00  0.00           C
ATOM   1876  H   VAL A 121      64.692 -26.464  20.877  1.00  0.00           H
ATOM   1877  HA  VAL A 121      66.085 -24.759  22.902  1.00  0.00           H
ATOM   1878  HB  VAL A 121      67.666 -26.625  23.371  1.00  0.00           H
ATOM   1879 HG21 VAL A 121      67.009 -28.931  22.800  1.00  0.00           H
ATOM   1880 HG22 VAL A 121      67.315 -27.940  21.375  1.00  0.00           H
ATOM   1881 HG23 VAL A 121      65.637 -28.334  21.850  1.00  0.00           H
ATOM   1882 HG11 VAL A 121      66.264 -27.808  24.938  1.00  0.00           H
ATOM   1883 HG12 VAL A 121      65.817 -26.088  24.899  1.00  0.00           H
ATOM   1884 HG13 VAL A 121      64.797 -27.282  24.082  1.00  0.00           H
ATOM   1885  N   GLY A 122      66.527 -24.996  19.957  1.00  0.00           N
ATOM   1886  CA  GLY A 122      67.308 -24.526  18.833  1.00  0.00           C
ATOM   1887  C   GLY A 122      68.378 -25.495  18.380  1.00  0.00           C
ATOM   1888  O   GLY A 122      68.182 -26.714  18.362  1.00  0.00           O
ATOM   1889  H   GLY A 122      65.525 -24.922  19.868  1.00  0.00           H
ATOM   1890  HA2 GLY A 122      67.773 -23.572  19.091  1.00  0.00           H
ATOM   1891  HA3 GLY A 122      66.649 -24.334  17.982  1.00  0.00           H
ATOM   1892  N   PHE A 123      69.523 -24.931  18.021  1.00  0.00           N
ATOM   1893  CA  PHE A 123      70.632 -25.683  17.457  1.00  0.00           C
ATOM   1894  C   PHE A 123      71.066 -26.843  18.355  1.00  0.00           C
ATOM   1895  O   PHE A 123      71.456 -27.909  17.871  1.00  0.00           O
ATOM   1896  CB  PHE A 123      71.785 -24.713  17.192  1.00  0.00           C
ATOM   1897  CG  PHE A 123      73.120 -25.367  17.010  1.00  0.00           C
ATOM   1898  CD1 PHE A 123      73.506 -25.855  15.773  1.00  0.00           C
ATOM   1899  CD2 PHE A 123      74.009 -25.453  18.071  1.00  0.00           C
ATOM   1900  CE1 PHE A 123      74.743 -26.441  15.601  1.00  0.00           C
ATOM   1901  CE2 PHE A 123      75.251 -26.035  17.906  1.00  0.00           C
ATOM   1902  CZ  PHE A 123      75.623 -26.533  16.670  1.00  0.00           C
ATOM   1903  H   PHE A 123      69.535 -23.914  17.936  1.00  0.00           H
ATOM   1904  HA  PHE A 123      70.320 -26.111  16.503  1.00  0.00           H
ATOM   1905  HB2 PHE A 123      71.863 -24.018  18.030  1.00  0.00           H
ATOM   1906  HB3 PHE A 123      71.550 -24.117  16.309  1.00  0.00           H
ATOM   1907  HD1 PHE A 123      72.823 -25.788  14.940  1.00  0.00           H
ATOM   1908  HD2 PHE A 123      73.729 -25.054  19.035  1.00  0.00           H
ATOM   1909  HE1 PHE A 123      75.033 -26.826  14.635  1.00  0.00           H
ATOM   1910  HE2 PHE A 123      75.941 -26.087  18.735  1.00  0.00           H
ATOM   1911  HZ  PHE A 123      76.600 -26.976  16.533  1.00  0.00           H
ATOM   1912  N   TYR A 124      70.972 -26.643  19.666  1.00  0.00           N
ATOM   1913  CA  TYR A 124      71.476 -27.621  20.625  1.00  0.00           C
ATOM   1914  C   TYR A 124      70.671 -28.918  20.662  1.00  0.00           C
ATOM   1915  O   TYR A 124      71.113 -29.914  21.235  1.00  0.00           O
ATOM   1916  CB  TYR A 124      71.620 -26.980  22.015  1.00  0.00           C
ATOM   1917  CG  TYR A 124      72.565 -25.800  21.963  1.00  0.00           C
ATOM   1918  CD1 TYR A 124      73.945 -25.991  21.955  1.00  0.00           C
ATOM   1919  CD2 TYR A 124      72.083 -24.502  21.857  1.00  0.00           C
ATOM   1920  CE1 TYR A 124      74.820 -24.915  21.873  1.00  0.00           C
ATOM   1921  CE2 TYR A 124      72.949 -23.418  21.778  1.00  0.00           C
ATOM   1922  CZ  TYR A 124      74.315 -23.631  21.785  1.00  0.00           C
ATOM   1923  OH  TYR A 124      75.175 -22.560  21.703  1.00  0.00           O
ATOM   1924  H   TYR A 124      70.622 -25.751  19.991  1.00  0.00           H
ATOM   1925  HA  TYR A 124      72.477 -27.903  20.297  1.00  0.00           H
ATOM   1926  HB2 TYR A 124      70.641 -26.661  22.377  1.00  0.00           H
ATOM   1927  HB3 TYR A 124      72.024 -27.717  22.709  1.00  0.00           H
ATOM   1928  HD1 TYR A 124      74.344 -26.995  22.008  1.00  0.00           H
ATOM   1929  HD2 TYR A 124      71.014 -24.325  21.825  1.00  0.00           H
ATOM   1930  HE1 TYR A 124      75.885 -25.087  21.871  1.00  0.00           H
ATOM   1931  HE2 TYR A 124      72.555 -22.417  21.686  1.00  0.00           H
ATOM   1932  HH  TYR A 124      76.078 -22.867  21.591  1.00  0.00           H
ATOM   1933  N   SER A 125      69.506 -28.909  20.025  1.00  0.00           N
ATOM   1934  CA  SER A 125      68.705 -30.116  19.892  1.00  0.00           C
ATOM   1935  C   SER A 125      69.477 -31.191  19.135  1.00  0.00           C
ATOM   1936  O   SER A 125      69.142 -32.373  19.210  1.00  0.00           O
ATOM   1937  CB  SER A 125      67.385 -29.817  19.181  1.00  0.00           C
ATOM   1938  OG  SER A 125      67.621 -29.407  17.849  1.00  0.00           O
ATOM   1939  H   SER A 125      69.218 -28.067  19.533  1.00  0.00           H
ATOM   1940  HA  SER A 125      68.481 -30.502  20.886  1.00  0.00           H
ATOM   1941  HB2 SER A 125      66.782 -30.724  19.159  1.00  0.00           H
ATOM   1942  HB3 SER A 125      66.819 -29.044  19.692  1.00  0.00           H
ATOM   1943  HG  SER A 125      67.752 -28.437  17.837  1.00  0.00           H
ATOM   1944  N   ALA A 126      70.509 -30.784  18.401  1.00  0.00           N
ATOM   1945  CA  ALA A 126      71.370 -31.750  17.724  1.00  0.00           C
ATOM   1946  C   ALA A 126      71.901 -32.772  18.726  1.00  0.00           C
ATOM   1947  O   ALA A 126      72.070 -33.948  18.402  1.00  0.00           O
ATOM   1948  CB  ALA A 126      72.528 -31.044  17.032  1.00  0.00           C
ATOM   1949  H   ALA A 126      70.689 -29.792  18.274  1.00  0.00           H
ATOM   1950  HA  ALA A 126      70.790 -32.289  16.973  1.00  0.00           H
ATOM   1951  HB1 ALA A 126      73.031 -30.371  17.729  1.00  0.00           H
ATOM   1952  HB2 ALA A 126      72.159 -30.464  16.186  1.00  0.00           H
ATOM   1953  HB3 ALA A 126      73.247 -31.780  16.685  1.00  0.00           H
ATOM   1954  N   TYR A 127      72.165 -32.325  19.949  1.00  0.00           N
ATOM   1955  CA  TYR A 127      72.740 -33.223  20.943  1.00  0.00           C
ATOM   1956  C   TYR A 127      71.733 -34.215  21.505  1.00  0.00           C
ATOM   1957  O   TYR A 127      72.085 -35.073  22.297  1.00  0.00           O
ATOM   1958  CB  TYR A 127      73.479 -32.450  22.035  1.00  0.00           C
ATOM   1959  CG  TYR A 127      74.717 -31.792  21.477  1.00  0.00           C
ATOM   1960  CD1 TYR A 127      74.673 -30.499  20.978  1.00  0.00           C
ATOM   1961  CD2 TYR A 127      75.919 -32.487  21.395  1.00  0.00           C
ATOM   1962  CE1 TYR A 127      75.795 -29.902  20.444  1.00  0.00           C
ATOM   1963  CE2 TYR A 127      77.049 -31.895  20.868  1.00  0.00           C
ATOM   1964  CZ  TYR A 127      76.978 -30.603  20.390  1.00  0.00           C
ATOM   1965  OH  TYR A 127      78.095 -30.009  19.858  1.00  0.00           O
ATOM   1966  H   TYR A 127      72.008 -31.352  20.184  1.00  0.00           H
ATOM   1967  HA  TYR A 127      73.496 -33.834  20.445  1.00  0.00           H
ATOM   1968  HB2 TYR A 127      72.820 -31.700  22.474  1.00  0.00           H
ATOM   1969  HB3 TYR A 127      73.784 -33.136  22.826  1.00  0.00           H
ATOM   1970  HD1 TYR A 127      73.743 -29.951  21.003  1.00  0.00           H
ATOM   1971  HD2 TYR A 127      75.971 -33.517  21.731  1.00  0.00           H
ATOM   1972  HE1 TYR A 127      75.753 -28.902  20.039  1.00  0.00           H
ATOM   1973  HE2 TYR A 127      77.971 -32.456  20.802  1.00  0.00           H
ATOM   1974  HH  TYR A 127      78.830 -30.632  19.751  1.00  0.00           H
ATOM   1975  N   LEU A 128      70.484 -34.118  21.063  1.00  0.00           N
ATOM   1976  CA  LEU A 128      69.513 -35.154  21.386  1.00  0.00           C
ATOM   1977  C   LEU A 128      69.832 -36.453  20.646  1.00  0.00           C
ATOM   1978  O   LEU A 128      69.555 -37.538  21.152  1.00  0.00           O
ATOM   1979  CB  LEU A 128      68.094 -34.701  21.046  1.00  0.00           C
ATOM   1980  CG  LEU A 128      67.513 -33.616  21.945  1.00  0.00           C
ATOM   1981  CD1 LEU A 128      66.261 -33.021  21.319  1.00  0.00           C
ATOM   1982  CD2 LEU A 128      67.226 -34.170  23.356  1.00  0.00           C
ATOM   1983  H   LEU A 128      70.243 -33.399  20.389  1.00  0.00           H
ATOM   1984  HA  LEU A 128      69.576 -35.374  22.451  1.00  0.00           H
ATOM   1985  HB2 LEU A 128      68.066 -34.383  20.005  1.00  0.00           H
ATOM   1986  HB3 LEU A 128      67.436 -35.564  21.105  1.00  0.00           H
ATOM   1987  HG  LEU A 128      68.237 -32.808  22.024  1.00  0.00           H
ATOM   1988 HD21 LEU A 128      66.851 -33.362  23.985  1.00  0.00           H
ATOM   1989 HD22 LEU A 128      66.473 -34.954  23.302  1.00  0.00           H
ATOM   1990 HD23 LEU A 128      68.131 -34.565  23.816  1.00  0.00           H
ATOM   1991 HD11 LEU A 128      65.913 -32.184  21.924  1.00  0.00           H
ATOM   1992 HD12 LEU A 128      65.478 -33.773  21.250  1.00  0.00           H
ATOM   1993 HD13 LEU A 128      66.493 -32.656  20.318  1.00  0.00           H
ATOM   1994  N   VAL A 129      70.411 -36.345  19.451  1.00  0.00           N
ATOM   1995  CA  VAL A 129      70.663 -37.526  18.629  1.00  0.00           C
ATOM   1996  C   VAL A 129      72.138 -37.725  18.274  1.00  0.00           C
ATOM   1997  O   VAL A 129      72.519 -38.772  17.756  1.00  0.00           O
ATOM   1998  CB  VAL A 129      69.832 -37.499  17.320  1.00  0.00           C
ATOM   1999  CG1 VAL A 129      68.344 -37.423  17.636  1.00  0.00           C
ATOM   2000  CG2 VAL A 129      70.257 -36.332  16.444  1.00  0.00           C
ATOM   2001  H   VAL A 129      70.635 -35.428  19.078  1.00  0.00           H
ATOM   2002  HA  VAL A 129      70.377 -38.421  19.168  1.00  0.00           H
ATOM   2003  HB  VAL A 129      70.008 -38.425  16.772  1.00  0.00           H
ATOM   2004 HG11 VAL A 129      68.072 -38.245  18.298  1.00  0.00           H
ATOM   2005 HG12 VAL A 129      68.096 -36.468  18.098  1.00  0.00           H
ATOM   2006 HG13 VAL A 129      67.778 -37.518  16.709  1.00  0.00           H
ATOM   2007 HG21 VAL A 129      71.307 -36.413  16.163  1.00  0.00           H
ATOM   2008 HG22 VAL A 129      70.089 -35.380  16.947  1.00  0.00           H
ATOM   2009 HG23 VAL A 129      69.671 -36.342  15.525  1.00  0.00           H
ATOM   2010  N   ALA A 130      72.966 -36.727  18.549  1.00  0.00           N
ATOM   2011  CA  ALA A 130      74.380 -36.811  18.192  1.00  0.00           C
ATOM   2012  C   ALA A 130      75.307 -36.694  19.401  1.00  0.00           C
ATOM   2013  O   ALA A 130      75.033 -35.939  20.331  1.00  0.00           O
ATOM   2014  CB  ALA A 130      74.724 -35.745  17.167  1.00  0.00           C
ATOM   2015  H   ALA A 130      72.616 -35.834  18.867  1.00  0.00           H
ATOM   2016  HA  ALA A 130      74.600 -37.773  17.731  1.00  0.00           H
ATOM   2017  HB1 ALA A 130      75.759 -35.851  16.844  1.00  0.00           H
ATOM   2018  HB2 ALA A 130      74.587 -34.752  17.596  1.00  0.00           H
ATOM   2019  HB3 ALA A 130      74.063 -35.867  16.316  1.00  0.00           H
ATOM   2020  N   ASP A 131      76.408 -37.442  19.363  1.00  0.00           N
ATOM   2021  CA  ASP A 131      77.461 -37.358  20.370  1.00  0.00           C
ATOM   2022  C   ASP A 131      78.379 -36.185  20.074  1.00  0.00           C
ATOM   2023  O   ASP A 131      78.916 -35.554  20.981  1.00  0.00           O
ATOM   2024  CB  ASP A 131      78.305 -38.638  20.371  1.00  0.00           C
ATOM   2025  CG  ASP A 131      77.599 -39.807  21.029  1.00  0.00           C
ATOM   2026  OD1 ASP A 131      77.006 -39.609  22.119  1.00  0.00           O
ATOM   2027  OD2 ASP A 131      77.647 -40.925  20.460  1.00  0.00           O
ATOM   2028  H   ASP A 131      76.565 -38.042  18.557  1.00  0.00           H
ATOM   2029  HA  ASP A 131      77.034 -37.209  21.363  1.00  0.00           H
ATOM   2030  HB2 ASP A 131      78.581 -38.893  19.345  1.00  0.00           H
ATOM   2031  HB3 ASP A 131      79.225 -38.454  20.928  1.00  0.00           H
ATOM   2032  N   HIS A 132      78.562 -35.911  18.789  1.00  0.00           N
ATOM   2033  CA  HIS A 132      79.516 -34.912  18.346  1.00  0.00           C
ATOM   2034  C   HIS A 132      78.914 -34.149  17.173  1.00  0.00           C
ATOM   2035  O   HIS A 132      78.187 -34.719  16.360  1.00  0.00           O
ATOM   2036  CB  HIS A 132      80.825 -35.597  17.944  1.00  0.00           C
ATOM   2037  CG  HIS A 132      81.954 -34.651  17.689  1.00  0.00           C
ATOM   2038  ND1 HIS A 132      82.662 -34.046  18.706  1.00  0.00           N
ATOM   2039  CD2 HIS A 132      82.510 -34.215  16.533  1.00  0.00           C
ATOM   2040  CE1 HIS A 132      83.599 -33.271  18.187  1.00  0.00           C
ATOM   2041  NE2 HIS A 132      83.527 -33.354  16.871  1.00  0.00           N
ATOM   2042  H   HIS A 132      78.079 -36.466  18.095  1.00  0.00           H
ATOM   2043  HA  HIS A 132      79.728 -34.205  19.149  1.00  0.00           H
ATOM   2044  HB2 HIS A 132      81.132 -36.265  18.750  1.00  0.00           H
ATOM   2045  HB3 HIS A 132      80.669 -36.202  17.053  1.00  0.00           H
ATOM   2046  HD2 HIS A 132      82.217 -34.514  15.537  1.00  0.00           H
ATOM   2047  HE1 HIS A 132      84.328 -32.695  18.740  1.00  0.00           H
ATOM   2048  HE2 HIS A 132      84.193 -32.907  16.231  1.00  0.00           H
ATOM   2049  N   VAL A 133      79.207 -32.857  17.097  1.00  0.00           N
ATOM   2050  CA  VAL A 133      78.648 -32.006  16.062  1.00  0.00           C
ATOM   2051  C   VAL A 133      79.727 -31.118  15.459  1.00  0.00           C
ATOM   2052  O   VAL A 133      80.522 -30.520  16.182  1.00  0.00           O
ATOM   2053  CB  VAL A 133      77.517 -31.111  16.601  1.00  0.00           C
ATOM   2054  CG1 VAL A 133      77.019 -30.189  15.504  1.00  0.00           C
ATOM   2055  CG2 VAL A 133      76.370 -31.963  17.135  1.00  0.00           C
ATOM   2056  H   VAL A 133      79.848 -32.449  17.770  1.00  0.00           H
ATOM   2057  HA  VAL A 133      78.236 -32.617  15.261  1.00  0.00           H
ATOM   2058  HB  VAL A 133      77.901 -30.495  17.407  1.00  0.00           H
ATOM   2059 HG21 VAL A 133      76.702 -32.562  17.982  1.00  0.00           H
ATOM   2060 HG22 VAL A 133      76.001 -32.626  16.353  1.00  0.00           H
ATOM   2061 HG23 VAL A 133      75.564 -31.316  17.479  1.00  0.00           H
ATOM   2062 HG11 VAL A 133      77.764 -29.435  15.252  1.00  0.00           H
ATOM   2063 HG12 VAL A 133      76.760 -30.762  14.613  1.00  0.00           H
ATOM   2064 HG13 VAL A 133      76.130 -29.660  15.850  1.00  0.00           H
ATOM   2065  N   VAL A 134      79.744 -31.044  14.132  1.00  0.00           N
ATOM   2066  CA  VAL A 134      80.691 -30.213  13.402  1.00  0.00           C
ATOM   2067  C   VAL A 134      79.950 -29.211  12.533  1.00  0.00           C
ATOM   2068  O   VAL A 134      78.960 -29.548  11.880  1.00  0.00           O
ATOM   2069  CB  VAL A 134      81.614 -31.071  12.520  1.00  0.00           C
ATOM   2070  CG1 VAL A 134      82.546 -30.195  11.696  1.00  0.00           C
ATOM   2071  CG2 VAL A 134      82.407 -32.033  13.391  1.00  0.00           C
ATOM   2072  H   VAL A 134      79.051 -31.566  13.604  1.00  0.00           H
ATOM   2073  HA  VAL A 134      81.318 -29.656  14.098  1.00  0.00           H
ATOM   2074  HB  VAL A 134      81.035 -31.657  11.825  1.00  0.00           H
ATOM   2075 HG21 VAL A 134      83.321 -32.356  12.892  1.00  0.00           H
ATOM   2076 HG22 VAL A 134      82.651 -31.595  14.353  1.00  0.00           H
ATOM   2077 HG23 VAL A 134      81.793 -32.909  13.594  1.00  0.00           H
ATOM   2078 HG11 VAL A 134      81.991 -29.630  10.948  1.00  0.00           H
ATOM   2079 HG12 VAL A 134      83.087 -29.510  12.350  1.00  0.00           H
ATOM   2080 HG13 VAL A 134      83.269 -30.817  11.169  1.00  0.00           H
ATOM   2081  N   VAL A 135      80.419 -27.971  12.542  1.00  0.00           N
ATOM   2082  CA  VAL A 135      79.810 -26.930  11.732  1.00  0.00           C
ATOM   2083  C   VAL A 135      80.852 -26.265  10.847  1.00  0.00           C
ATOM   2084  O   VAL A 135      81.775 -25.613  11.329  1.00  0.00           O
ATOM   2085  CB  VAL A 135      79.126 -25.859  12.604  1.00  0.00           C
ATOM   2086  CG1 VAL A 135      78.488 -24.789  11.724  1.00  0.00           C
ATOM   2087  CG2 VAL A 135      78.081 -26.498  13.508  1.00  0.00           C
ATOM   2088  H   VAL A 135      81.234 -27.747  13.104  1.00  0.00           H
ATOM   2089  HA  VAL A 135      79.042 -27.350  11.086  1.00  0.00           H
ATOM   2090  HB  VAL A 135      79.808 -25.355  13.221  1.00  0.00           H
ATOM   2091 HG11 VAL A 135      79.254 -24.198  11.221  1.00  0.00           H
ATOM   2092 HG12 VAL A 135      77.844 -25.250  10.977  1.00  0.00           H
ATOM   2093 HG13 VAL A 135      77.895 -24.109  12.337  1.00  0.00           H
ATOM   2094 HG21 VAL A 135      78.552 -27.157  14.233  1.00  0.00           H
ATOM   2095 HG22 VAL A 135      77.381 -27.081  12.914  1.00  0.00           H
ATOM   2096 HG23 VAL A 135      77.540 -25.724  14.053  1.00  0.00           H
ATOM   2097  N   ILE A 136      80.711 -26.444   9.545  1.00  0.00           N
ATOM   2098  CA  ILE A 136      81.567 -25.750   8.602  1.00  0.00           C
ATOM   2099  C   ILE A 136      80.762 -24.584   8.065  1.00  0.00           C
ATOM   2100  O   ILE A 136      79.616 -24.757   7.655  1.00  0.00           O
ATOM   2101  CB  ILE A 136      81.977 -26.675   7.446  1.00  0.00           C
ATOM   2102  CG1 ILE A 136      82.611 -27.958   7.997  1.00  0.00           C
ATOM   2103  CG2 ILE A 136      82.913 -25.950   6.488  1.00  0.00           C
ATOM   2104  CD1 ILE A 136      82.736 -29.068   6.970  1.00  0.00           C
ATOM   2105  H   ILE A 136      79.898 -26.949   9.203  1.00  0.00           H
ATOM   2106  HA  ILE A 136      82.472 -25.381   9.085  1.00  0.00           H
ATOM   2107  HB  ILE A 136      81.077 -26.951   6.896  1.00  0.00           H
ATOM   2108 HG12 ILE A 136      83.597 -27.735   8.404  1.00  0.00           H
ATOM   2109 HG13 ILE A 136      82.010 -28.378   8.802  1.00  0.00           H
ATOM   2110 HD11 ILE A 136      83.130 -29.962   7.454  1.00  0.00           H
ATOM   2111 HD12 ILE A 136      83.418 -28.778   6.172  1.00  0.00           H
ATOM   2112 HD13 ILE A 136      81.757 -29.296   6.549  1.00  0.00           H
ATOM   2113 HG21 ILE A 136      83.177 -26.601   5.656  1.00  0.00           H
ATOM   2114 HG22 ILE A 136      83.825 -25.654   7.010  1.00  0.00           H
ATOM   2115 HG23 ILE A 136      82.435 -25.065   6.071  1.00  0.00           H
ATOM   2116  N   SER A 137      81.341 -23.391   8.081  1.00  0.00           N
ATOM   2117  CA  SER A 137      80.602 -22.221   7.630  1.00  0.00           C
ATOM   2118  C   SER A 137      81.462 -21.234   6.855  1.00  0.00           C
ATOM   2119  O   SER A 137      82.635 -21.030   7.164  1.00  0.00           O
ATOM   2120  CB  SER A 137      79.932 -21.515   8.810  1.00  0.00           C
ATOM   2121  OG  SER A 137      78.844 -20.724   8.360  1.00  0.00           O
ATOM   2122  H   SER A 137      82.278 -23.284   8.460  1.00  0.00           H
ATOM   2123  HA  SER A 137      79.811 -22.542   6.956  1.00  0.00           H
ATOM   2124  HB2 SER A 137      80.660 -20.887   9.328  1.00  0.00           H
ATOM   2125  HB3 SER A 137      79.547 -22.258   9.510  1.00  0.00           H
ATOM   2126  HG  SER A 137      78.059 -21.288   8.194  1.00  0.00           H
ATOM   2127  N   LYS A 138      80.852 -20.621   5.847  1.00  0.00           N
ATOM   2128  CA  LYS A 138      81.510 -19.600   5.043  1.00  0.00           C
ATOM   2129  C   LYS A 138      80.555 -18.440   4.784  1.00  0.00           C
ATOM   2130  O   LYS A 138      79.489 -18.600   4.176  1.00  0.00           O
ATOM   2131  CB  LYS A 138      81.992 -20.184   3.712  1.00  0.00           C
ATOM   2132  CG  LYS A 138      82.516 -19.146   2.730  1.00  0.00           C
ATOM   2133  CD  LYS A 138      83.865 -18.594   3.159  1.00  0.00           C
ATOM   2134  CE  LYS A 138      84.445 -17.671   2.085  1.00  0.00           C
ATOM   2135  NZ  LYS A 138      83.748 -16.355   2.040  1.00  0.00           N
ATOM   2136  H   LYS A 138      79.874 -20.851   5.668  1.00  0.00           H
ATOM   2137  HA  LYS A 138      82.371 -19.213   5.592  1.00  0.00           H
ATOM   2138  HB2 LYS A 138      82.759 -20.936   3.902  1.00  0.00           H
ATOM   2139  HB3 LYS A 138      81.148 -20.690   3.238  1.00  0.00           H
ATOM   2140  HG2 LYS A 138      82.654 -19.650   1.773  1.00  0.00           H
ATOM   2141  HG3 LYS A 138      81.801 -18.339   2.572  1.00  0.00           H
ATOM   2142  HD2 LYS A 138      84.555 -19.424   3.303  1.00  0.00           H
ATOM   2143  HD3 LYS A 138      83.776 -18.053   4.104  1.00  0.00           H
ATOM   2144  HE2 LYS A 138      85.497 -17.491   2.330  1.00  0.00           H
ATOM   2145  HE3 LYS A 138      84.395 -18.167   1.112  1.00  0.00           H
ATOM   2146  HZ1 LYS A 138      82.768 -16.453   1.834  1.00  0.00           H
ATOM   2147  HZ2 LYS A 138      84.209 -15.703   1.422  1.00  0.00           H
ATOM   2148  HZ3 LYS A 138      83.817 -15.930   2.977  1.00  0.00           H
ATOM   2149  N   ASN A 139      80.954 -17.275   5.271  1.00  0.00           N
ATOM   2150  CA  ASN A 139      80.214 -16.036   5.115  1.00  0.00           C
ATOM   2151  C   ASN A 139      81.023 -15.139   4.166  1.00  0.00           C
ATOM   2152  O   ASN A 139      82.252 -15.243   4.112  1.00  0.00           O
ATOM   2153  CB  ASN A 139      80.033 -15.405   6.506  1.00  0.00           C
ATOM   2154  CG  ASN A 139      79.394 -14.035   6.467  1.00  0.00           C
ATOM   2155  OD1 ASN A 139      80.024 -13.049   6.085  1.00  0.00           O
ATOM   2156  ND2 ASN A 139      78.148 -13.958   6.908  1.00  0.00           N
ATOM   2157  H   ASN A 139      81.815 -17.239   5.797  1.00  0.00           H
ATOM   2158  HA  ASN A 139      79.227 -16.217   4.681  1.00  0.00           H
ATOM   2159  HB2 ASN A 139      79.431 -16.062   7.120  1.00  0.00           H
ATOM   2160  HB3 ASN A 139      81.006 -15.297   6.984  1.00  0.00           H
ATOM   2161 HD21 ASN A 139      77.654 -14.779   7.240  1.00  0.00           H
ATOM   2162 HD22 ASN A 139      77.770 -13.035   7.015  1.00  0.00           H
ATOM   2163  N   ASN A 140      80.346 -14.287   3.402  1.00  0.00           N
ATOM   2164  CA  ASN A 140      81.031 -13.454   2.409  1.00  0.00           C
ATOM   2165  C   ASN A 140      82.190 -12.656   3.002  1.00  0.00           C
ATOM   2166  O   ASN A 140      83.167 -12.369   2.318  1.00  0.00           O
ATOM   2167  CB  ASN A 140      80.051 -12.487   1.722  1.00  0.00           C
ATOM   2168  CG  ASN A 140      79.196 -13.160   0.651  1.00  0.00           C
ATOM   2169  OD1 ASN A 140      78.129 -12.659   0.295  1.00  0.00           O
ATOM   2170  ND2 ASN A 140      79.663 -14.288   0.130  1.00  0.00           N
ATOM   2171  H   ASN A 140      79.366 -14.124   3.593  1.00  0.00           H
ATOM   2172  HA  ASN A 140      81.519 -14.092   1.680  1.00  0.00           H
ATOM   2173  HB2 ASN A 140      80.619 -11.698   1.227  1.00  0.00           H
ATOM   2174  HB3 ASN A 140      79.405 -12.016   2.465  1.00  0.00           H
ATOM   2175 HD21 ASN A 140      80.548 -14.655   0.403  1.00  0.00           H
ATOM   2176 HD22 ASN A 140      79.102 -14.679  -0.603  1.00  0.00           H
ATOM   2177  N   ASP A 141      82.078 -12.309   4.281  1.00  0.00           N
ATOM   2178  CA  ASP A 141      83.014 -11.382   4.910  1.00  0.00           C
ATOM   2179  C   ASP A 141      84.136 -12.051   5.699  1.00  0.00           C
ATOM   2180  O   ASP A 141      84.768 -11.415   6.540  1.00  0.00           O
ATOM   2181  CB  ASP A 141      82.253 -10.415   5.812  1.00  0.00           C
ATOM   2182  CG  ASP A 141      81.283  -9.548   5.037  1.00  0.00           C
ATOM   2183  OD1 ASP A 141      81.708  -8.935   4.036  1.00  0.00           O
ATOM   2184  OD2 ASP A 141      80.098  -9.479   5.425  1.00  0.00           O
ATOM   2185  H   ASP A 141      81.227 -12.516   4.796  1.00  0.00           H
ATOM   2186  HA  ASP A 141      83.500 -10.782   4.139  1.00  0.00           H
ATOM   2187  HB2 ASP A 141      81.723 -10.976   6.584  1.00  0.00           H
ATOM   2188  HB3 ASP A 141      82.952  -9.740   6.308  1.00  0.00           H
ATOM   2189  N   ASP A 142      84.389 -13.324   5.422  1.00  0.00           N
ATOM   2190  CA  ASP A 142      85.436 -14.052   6.128  1.00  0.00           C
ATOM   2191  C   ASP A 142      85.761 -15.333   5.371  1.00  0.00           C
ATOM   2192  O   ASP A 142      85.066 -15.696   4.419  1.00  0.00           O
ATOM   2193  CB  ASP A 142      84.993 -14.375   7.564  1.00  0.00           C
ATOM   2194  CG  ASP A 142      86.167 -14.597   8.509  1.00  0.00           C
ATOM   2195  OD1 ASP A 142      87.316 -14.713   8.035  1.00  0.00           O
ATOM   2196  OD2 ASP A 142      85.939 -14.653   9.736  1.00  0.00           O
ATOM   2197  H   ASP A 142      83.813 -13.818   4.756  1.00  0.00           H
ATOM   2198  HA  ASP A 142      86.333 -13.430   6.159  1.00  0.00           H
ATOM   2199  HB2 ASP A 142      84.349 -15.256   7.562  1.00  0.00           H
ATOM   2200  HB3 ASP A 142      84.416 -13.545   7.968  1.00  0.00           H
ATOM   2201  N   GLU A 143      86.826 -16.004   5.795  1.00  0.00           N
ATOM   2202  CA  GLU A 143      87.206 -17.294   5.238  1.00  0.00           C
ATOM   2203  C   GLU A 143      86.371 -18.399   5.871  1.00  0.00           C
ATOM   2204  O   GLU A 143      85.552 -18.146   6.750  1.00  0.00           O
ATOM   2205  CB  GLU A 143      88.696 -17.555   5.466  1.00  0.00           C
ATOM   2206  CG  GLU A 143      89.602 -16.505   4.838  1.00  0.00           C
ATOM   2207  CD  GLU A 143      89.343 -16.339   3.351  1.00  0.00           C
ATOM   2208  OE1 GLU A 143      89.554 -17.316   2.601  1.00  0.00           O
ATOM   2209  OE2 GLU A 143      88.922 -15.236   2.931  1.00  0.00           O
ATOM   2210  H   GLU A 143      87.314 -15.641   6.609  1.00  0.00           H
ATOM   2211  HA  GLU A 143      87.010 -17.294   4.166  1.00  0.00           H
ATOM   2212  HB2 GLU A 143      88.963 -18.526   5.045  1.00  0.00           H
ATOM   2213  HB3 GLU A 143      88.896 -17.593   6.538  1.00  0.00           H
ATOM   2214  HG2 GLU A 143      90.640 -16.815   4.987  1.00  0.00           H
ATOM   2215  HG3 GLU A 143      89.473 -15.553   5.357  1.00  0.00           H
ATOM   2216  N   GLN A 144      86.579 -19.625   5.413  1.00  0.00           N
ATOM   2217  CA  GLN A 144      85.818 -20.754   5.903  1.00  0.00           C
ATOM   2218  C   GLN A 144      86.375 -21.215   7.240  1.00  0.00           C
ATOM   2219  O   GLN A 144      87.588 -21.350   7.401  1.00  0.00           O
ATOM   2220  CB  GLN A 144      85.867 -21.891   4.885  1.00  0.00           C
ATOM   2221  CG  GLN A 144      84.948 -23.053   5.204  1.00  0.00           C
ATOM   2222  CD  GLN A 144      84.675 -23.909   3.985  1.00  0.00           C
ATOM   2223  OE1 GLN A 144      84.137 -23.429   2.991  1.00  0.00           O
ATOM   2224  NE2 GLN A 144      85.048 -25.183   4.054  1.00  0.00           N
ATOM   2225  H   GLN A 144      87.318 -19.781   4.750  1.00  0.00           H
ATOM   2226  HA  GLN A 144      84.779 -20.448   6.038  1.00  0.00           H
ATOM   2227  HB2 GLN A 144      85.569 -21.476   3.922  1.00  0.00           H
ATOM   2228  HB3 GLN A 144      86.890 -22.255   4.782  1.00  0.00           H
ATOM   2229  HG2 GLN A 144      83.987 -22.672   5.548  1.00  0.00           H
ATOM   2230  HG3 GLN A 144      85.369 -23.655   6.009  1.00  0.00           H
ATOM   2231 HE21 GLN A 144      84.753 -25.816   3.317  1.00  0.00           H
ATOM   2232 HE22 GLN A 144      85.440 -25.581   4.916  1.00  0.00           H
ATOM   2233  N   TYR A 145      85.488 -21.449   8.202  1.00  0.00           N
ATOM   2234  CA  TYR A 145      85.901 -21.917   9.522  1.00  0.00           C
ATOM   2235  C   TYR A 145      85.163 -23.185   9.933  1.00  0.00           C
ATOM   2236  O   TYR A 145      84.130 -23.530   9.359  1.00  0.00           O
ATOM   2237  CB  TYR A 145      85.700 -20.821  10.573  1.00  0.00           C
ATOM   2238  CG  TYR A 145      86.827 -19.817  10.600  1.00  0.00           C
ATOM   2239  CD1 TYR A 145      87.826 -19.888  11.568  1.00  0.00           C
ATOM   2240  CD2 TYR A 145      86.906 -18.809   9.647  1.00  0.00           C
ATOM   2241  CE1 TYR A 145      88.867 -18.977  11.591  1.00  0.00           C
ATOM   2242  CE2 TYR A 145      87.940 -17.892   9.661  1.00  0.00           C
ATOM   2243  CZ  TYR A 145      88.919 -17.979  10.631  1.00  0.00           C
ATOM   2244  OH  TYR A 145      89.949 -17.064  10.639  1.00  0.00           O
ATOM   2245  H   TYR A 145      84.496 -21.319   8.018  1.00  0.00           H
ATOM   2246  HA  TYR A 145      86.959 -22.179   9.522  1.00  0.00           H
ATOM   2247  HB2 TYR A 145      84.759 -20.302  10.381  1.00  0.00           H
ATOM   2248  HB3 TYR A 145      85.625 -21.270  11.564  1.00  0.00           H
ATOM   2249  HD1 TYR A 145      87.801 -20.692  12.286  1.00  0.00           H
ATOM   2250  HD2 TYR A 145      86.108 -18.708   8.931  1.00  0.00           H
ATOM   2251  HE1 TYR A 145      89.651 -19.059  12.326  1.00  0.00           H
ATOM   2252  HE2 TYR A 145      87.943 -17.084   8.940  1.00  0.00           H
ATOM   2253  HH  TYR A 145      89.751 -16.375   9.994  1.00  0.00           H
ATOM   2254  N   VAL A 146      85.709 -23.875  10.928  1.00  0.00           N
ATOM   2255  CA  VAL A 146      85.109 -25.098  11.444  1.00  0.00           C
ATOM   2256  C   VAL A 146      84.905 -25.002  12.948  1.00  0.00           C
ATOM   2257  O   VAL A 146      85.837 -24.716  13.703  1.00  0.00           O
ATOM   2258  CB  VAL A 146      85.966 -26.335  11.134  1.00  0.00           C
ATOM   2259  CG1 VAL A 146      85.276 -27.600  11.641  1.00  0.00           C
ATOM   2260  CG2 VAL A 146      86.218 -26.433   9.649  1.00  0.00           C
ATOM   2261  H   VAL A 146      86.617 -23.601  11.284  1.00  0.00           H
ATOM   2262  HA  VAL A 146      84.138 -25.257  10.979  1.00  0.00           H
ATOM   2263  HB  VAL A 146      86.930 -26.247  11.638  1.00  0.00           H
ATOM   2264 HG21 VAL A 146      86.626 -27.413   9.406  1.00  0.00           H
ATOM   2265 HG22 VAL A 146      86.967 -25.694   9.394  1.00  0.00           H
ATOM   2266 HG23 VAL A 146      85.303 -26.263   9.083  1.00  0.00           H
ATOM   2267 HG11 VAL A 146      85.152 -27.560  12.718  1.00  0.00           H
ATOM   2268 HG12 VAL A 146      85.888 -28.474  11.415  1.00  0.00           H
ATOM   2269 HG13 VAL A 146      84.300 -27.709  11.168  1.00  0.00           H
ATOM   2270  N   TRP A 147      83.667 -25.237  13.360  1.00  0.00           N
ATOM   2271  CA  TRP A 147      83.268 -25.226  14.754  1.00  0.00           C
ATOM   2272  C   TRP A 147      83.046 -26.678  15.115  1.00  0.00           C
ATOM   2273  O   TRP A 147      82.426 -27.412  14.351  1.00  0.00           O
ATOM   2274  CB  TRP A 147      81.962 -24.441  14.891  1.00  0.00           C
ATOM   2275  CG  TRP A 147      81.331 -24.384  16.272  1.00  0.00           C
ATOM   2276  CD1 TRP A 147      81.367 -23.332  17.145  1.00  0.00           C
ATOM   2277  CD2 TRP A 147      80.532 -25.400  16.906  1.00  0.00           C
ATOM   2278  NE1 TRP A 147      80.659 -23.635  18.286  1.00  0.00           N
ATOM   2279  CE2 TRP A 147      80.137 -24.896  18.165  1.00  0.00           C
ATOM   2280  CE3 TRP A 147      80.121 -26.685  16.536  1.00  0.00           C
ATOM   2281  CZ2 TRP A 147      79.342 -25.630  19.053  1.00  0.00           C
ATOM   2282  CZ3 TRP A 147      79.337 -27.420  17.427  1.00  0.00           C
ATOM   2283  CH2 TRP A 147      78.959 -26.888  18.671  1.00  0.00           C
ATOM   2284  H   TRP A 147      82.965 -25.484  12.670  1.00  0.00           H
ATOM   2285  HA  TRP A 147      84.030 -24.779  15.381  1.00  0.00           H
ATOM   2286  HB2 TRP A 147      81.283 -24.892  14.230  1.00  0.00           H
ATOM   2287  HB3 TRP A 147      82.141 -23.421  14.554  1.00  0.00           H
ATOM   2288  HD1 TRP A 147      81.859 -22.388  16.953  1.00  0.00           H
ATOM   2289  HE3 TRP A 147      80.387 -27.099  15.580  1.00  0.00           H
ATOM   2290  HZ2 TRP A 147      79.040 -25.203  19.995  1.00  0.00           H
ATOM   2291  HZ3 TRP A 147      79.020 -28.417  17.157  1.00  0.00           H
ATOM   2292  HH2 TRP A 147      78.336 -27.478  19.327  1.00  0.00           H
ATOM   2293  HE1 TRP A 147      80.456 -22.982  19.038  1.00  0.00           H
ATOM   2294  N   GLU A 148      83.573 -27.101  16.259  1.00  0.00           N
ATOM   2295  CA  GLU A 148      83.393 -28.474  16.733  1.00  0.00           C
ATOM   2296  C   GLU A 148      83.116 -28.514  18.225  1.00  0.00           C
ATOM   2297  O   GLU A 148      83.672 -27.724  18.991  1.00  0.00           O
ATOM   2298  CB  GLU A 148      84.635 -29.319  16.453  1.00  0.00           C
ATOM   2299  CG  GLU A 148      84.855 -29.667  14.996  1.00  0.00           C
ATOM   2300  CD  GLU A 148      85.958 -30.701  14.804  1.00  0.00           C
ATOM   2301  OE1 GLU A 148      86.922 -30.416  14.059  1.00  0.00           O
ATOM   2302  OE2 GLU A 148      85.859 -31.798  15.398  1.00  0.00           O
ATOM   2303  H   GLU A 148      84.091 -26.447  16.835  1.00  0.00           H
ATOM   2304  HA  GLU A 148      82.543 -28.937  16.229  1.00  0.00           H
ATOM   2305  HB2 GLU A 148      84.523 -30.253  17.006  1.00  0.00           H
ATOM   2306  HB3 GLU A 148      85.518 -28.811  16.838  1.00  0.00           H
ATOM   2307  HG2 GLU A 148      85.137 -28.748  14.488  1.00  0.00           H
ATOM   2308  HG3 GLU A 148      83.927 -30.005  14.555  1.00  0.00           H
ATOM   2309  N   SER A 149      82.268 -29.447  18.640  1.00  0.00           N
ATOM   2310  CA  SER A 149      82.067 -29.694  20.060  1.00  0.00           C
ATOM   2311  C   SER A 149      81.465 -31.059  20.318  1.00  0.00           C
ATOM   2312  O   SER A 149      80.526 -31.479  19.637  1.00  0.00           O
ATOM   2313  CB  SER A 149      81.178 -28.623  20.691  1.00  0.00           C
ATOM   2314  OG  SER A 149      81.157 -28.775  22.104  1.00  0.00           O
ATOM   2315  H   SER A 149      81.783 -30.027  17.959  1.00  0.00           H
ATOM   2316  HA  SER A 149      83.041 -29.649  20.547  1.00  0.00           H
ATOM   2317  HB2 SER A 149      81.539 -27.637  20.420  1.00  0.00           H
ATOM   2318  HB3 SER A 149      80.168 -28.723  20.303  1.00  0.00           H
ATOM   2319  HG  SER A 149      81.911 -28.275  22.470  1.00  0.00           H
ATOM   2320  N   ALA A 150      82.017 -31.743  21.314  1.00  0.00           N
ATOM   2321  CA  ALA A 150      81.432 -32.976  21.828  1.00  0.00           C
ATOM   2322  C   ALA A 150      80.727 -32.678  23.146  1.00  0.00           C
ATOM   2323  O   ALA A 150      80.535 -33.565  23.980  1.00  0.00           O
ATOM   2324  CB  ALA A 150      82.502 -34.031  22.021  1.00  0.00           C
ATOM   2325  H   ALA A 150      82.835 -31.375  21.767  1.00  0.00           H
ATOM   2326  HA  ALA A 150      80.692 -33.371  21.129  1.00  0.00           H
ATOM   2327  HB1 ALA A 150      83.065 -33.839  22.934  1.00  0.00           H
ATOM   2328  HB2 ALA A 150      82.027 -35.011  22.095  1.00  0.00           H
ATOM   2329  HB3 ALA A 150      83.195 -34.043  21.184  1.00  0.00           H
ATOM   2330  N   ALA A 151      80.359 -31.413  23.324  1.00  0.00           N
ATOM   2331  CA  ALA A 151      79.610 -30.970  24.494  1.00  0.00           C
ATOM   2332  C   ALA A 151      80.339 -31.242  25.798  1.00  0.00           C
ATOM   2333  O   ALA A 151      79.792 -31.895  26.684  1.00  0.00           O
ATOM   2334  CB  ALA A 151      78.247 -31.633  24.523  1.00  0.00           C
ATOM   2335  H   ALA A 151      80.515 -30.750  22.576  1.00  0.00           H
ATOM   2336  HA  ALA A 151      79.470 -29.893  24.414  1.00  0.00           H
ATOM   2337  HB1 ALA A 151      78.324 -32.710  24.677  1.00  0.00           H
ATOM   2338  HB2 ALA A 151      77.679 -31.201  25.343  1.00  0.00           H
ATOM   2339  HB3 ALA A 151      77.723 -31.455  23.585  1.00  0.00           H
ATOM   2340  N   GLY A 152      81.563 -30.746  25.929  1.00  0.00           N
ATOM   2341  CA  GLY A 152      82.315 -30.982  27.150  1.00  0.00           C
ATOM   2342  C   GLY A 152      82.616 -29.719  27.937  1.00  0.00           C
ATOM   2343  O   GLY A 152      83.617 -29.651  28.660  1.00  0.00           O
ATOM   2344  H   GLY A 152      82.013 -30.340  25.121  1.00  0.00           H
ATOM   2345  HA2 GLY A 152      81.803 -31.676  27.817  1.00  0.00           H
ATOM   2346  HA3 GLY A 152      83.267 -31.441  26.881  1.00  0.00           H
ATOM   2347  N   GLY A 153      81.749 -28.719  27.797  1.00  0.00           N
ATOM   2348  CA  GLY A 153      81.980 -27.418  28.398  1.00  0.00           C
ATOM   2349  C   GLY A 153      82.755 -26.499  27.465  1.00  0.00           C
ATOM   2350  O   GLY A 153      82.902 -25.306  27.729  1.00  0.00           O
ATOM   2351  H   GLY A 153      80.942 -28.868  27.207  1.00  0.00           H
ATOM   2352  HA2 GLY A 153      81.021 -26.951  28.615  1.00  0.00           H
ATOM   2353  HA3 GLY A 153      82.543 -27.522  29.326  1.00  0.00           H
ATOM   2354  N   SER A 154      83.252 -27.048  26.362  1.00  0.00           N
ATOM   2355  CA  SER A 154      84.010 -26.238  25.417  1.00  0.00           C
ATOM   2356  C   SER A 154      83.719 -26.571  23.962  1.00  0.00           C
ATOM   2357  O   SER A 154      83.136 -27.612  23.639  1.00  0.00           O
ATOM   2358  CB  SER A 154      85.512 -26.381  25.674  1.00  0.00           C
ATOM   2359  OG  SER A 154      85.944 -27.704  25.397  1.00  0.00           O
ATOM   2360  H   SER A 154      83.178 -28.037  26.185  1.00  0.00           H
ATOM   2361  HA  SER A 154      83.744 -25.192  25.544  1.00  0.00           H
ATOM   2362  HB2 SER A 154      85.731 -26.132  26.713  1.00  0.00           H
ATOM   2363  HB3 SER A 154      86.057 -25.690  25.030  1.00  0.00           H
ATOM   2364  HG  SER A 154      86.889 -27.699  25.215  1.00  0.00           H
ATOM   2365  N   PHE A 155      84.137 -25.667  23.085  1.00  0.00           N
ATOM   2366  CA  PHE A 155      84.143 -25.932  21.657  1.00  0.00           C
ATOM   2367  C   PHE A 155      85.381 -25.311  21.025  1.00  0.00           C
ATOM   2368  O   PHE A 155      86.016 -24.439  21.615  1.00  0.00           O
ATOM   2369  CB  PHE A 155      82.861 -25.420  20.987  1.00  0.00           C
ATOM   2370  CG  PHE A 155      82.677 -23.925  21.055  1.00  0.00           C
ATOM   2371  CD1 PHE A 155      83.079 -23.114  20.002  1.00  0.00           C
ATOM   2372  CD2 PHE A 155      82.078 -23.334  22.158  1.00  0.00           C
ATOM   2373  CE1 PHE A 155      82.898 -21.736  20.049  1.00  0.00           C
ATOM   2374  CE2 PHE A 155      81.892 -21.958  22.218  1.00  0.00           C
ATOM   2375  CZ  PHE A 155      82.304 -21.157  21.153  1.00  0.00           C
ATOM   2376  H   PHE A 155      84.580 -24.812  23.406  1.00  0.00           H
ATOM   2377  HA  PHE A 155      84.202 -27.007  21.480  1.00  0.00           H
ATOM   2378  HB2 PHE A 155      82.005 -25.880  21.478  1.00  0.00           H
ATOM   2379  HB3 PHE A 155      82.837 -25.703  19.938  1.00  0.00           H
ATOM   2380  HD1 PHE A 155      83.527 -23.562  19.124  1.00  0.00           H
ATOM   2381  HD2 PHE A 155      81.742 -23.953  22.976  1.00  0.00           H
ATOM   2382  HE1 PHE A 155      83.198 -21.122  19.212  1.00  0.00           H
ATOM   2383  HE2 PHE A 155      81.423 -21.512  23.081  1.00  0.00           H
ATOM   2384  HZ  PHE A 155      82.135 -20.094  21.149  1.00  0.00           H
ATOM   2385  N   THR A 156      85.736 -25.777  19.834  1.00  0.00           N
ATOM   2386  CA  THR A 156      86.860 -25.202  19.116  1.00  0.00           C
ATOM   2387  C   THR A 156      86.400 -24.554  17.814  1.00  0.00           C
ATOM   2388  O   THR A 156      85.381 -24.938  17.237  1.00  0.00           O
ATOM   2389  CB  THR A 156      87.945 -26.256  18.812  1.00  0.00           C
ATOM   2390  OG1 THR A 156      87.385 -27.322  18.035  1.00  0.00           O
ATOM   2391  CG2 THR A 156      88.529 -26.829  20.111  1.00  0.00           C
ATOM   2392  H   THR A 156      85.163 -26.478  19.367  1.00  0.00           H
ATOM   2393  HA  THR A 156      87.320 -24.425  19.712  1.00  0.00           H
ATOM   2394  HB  THR A 156      88.709 -25.777  18.230  1.00  0.00           H
ATOM   2395 HG21 THR A 156      89.317 -27.540  19.865  1.00  0.00           H
ATOM   2396 HG22 THR A 156      87.755 -27.351  20.673  1.00  0.00           H
ATOM   2397 HG23 THR A 156      88.942 -26.023  20.712  1.00  0.00           H
ATOM   2398  HG1 THR A 156      87.099 -26.995  17.175  1.00  0.00           H
ATOM   2399  N   VAL A 157      87.152 -23.556  17.372  1.00  0.00           N
ATOM   2400  CA  VAL A 157      86.955 -22.951  16.064  1.00  0.00           C
ATOM   2401  C   VAL A 157      88.300 -22.921  15.359  1.00  0.00           C
ATOM   2402  O   VAL A 157      89.285 -22.430  15.908  1.00  0.00           O
ATOM   2403  CB  VAL A 157      86.391 -21.536  16.170  1.00  0.00           C
ATOM   2404  CG1 VAL A 157      86.225 -20.929  14.790  1.00  0.00           C
ATOM   2405  CG2 VAL A 157      85.064 -21.560  16.897  1.00  0.00           C
ATOM   2406  H   VAL A 157      87.964 -23.275  17.914  1.00  0.00           H
ATOM   2407  HA  VAL A 157      86.247 -23.537  15.505  1.00  0.00           H
ATOM   2408  HB  VAL A 157      87.079 -20.905  16.731  1.00  0.00           H
ATOM   2409 HG21 VAL A 157      84.621 -20.566  16.895  1.00  0.00           H
ATOM   2410 HG22 VAL A 157      85.206 -21.867  17.932  1.00  0.00           H
ATOM   2411 HG23 VAL A 157      84.382 -22.255  16.405  1.00  0.00           H
ATOM   2412 HG11 VAL A 157      87.203 -20.709  14.371  1.00  0.00           H
ATOM   2413 HG12 VAL A 157      85.670 -19.994  14.863  1.00  0.00           H
ATOM   2414 HG13 VAL A 157      85.677 -21.612  14.139  1.00  0.00           H
ATOM   2415  N   THR A 158      88.341 -23.465  14.149  1.00  0.00           N
ATOM   2416  CA  THR A 158      89.589 -23.623  13.416  1.00  0.00           C
ATOM   2417  C   THR A 158      89.408 -23.135  11.992  1.00  0.00           C
ATOM   2418  O   THR A 158      88.440 -23.512  11.332  1.00  0.00           O
ATOM   2419  CB  THR A 158      89.994 -25.107  13.348  1.00  0.00           C
ATOM   2420  OG1 THR A 158      90.035 -25.657  14.671  1.00  0.00           O
ATOM   2421  CG2 THR A 158      91.357 -25.271  12.672  1.00  0.00           C
ATOM   2422  H   THR A 158      87.513 -23.950  13.813  1.00  0.00           H
ATOM   2423  HA  THR A 158      90.395 -23.065  13.891  1.00  0.00           H
ATOM   2424  HB  THR A 158      89.248 -25.661  12.776  1.00  0.00           H
ATOM   2425  HG1 THR A 158      90.278 -26.587  14.621  1.00  0.00           H
ATOM   2426 HG21 THR A 158      91.669 -26.312  12.747  1.00  0.00           H
ATOM   2427 HG22 THR A 158      91.292 -25.026  11.618  1.00  0.00           H
ATOM   2428 HG23 THR A 158      92.099 -24.638  13.159  1.00  0.00           H
ATOM   2429  N   LYS A 159      90.327 -22.304  11.510  1.00  0.00           N
ATOM   2430  CA  LYS A 159      90.273 -21.886  10.115  1.00  0.00           C
ATOM   2431  C   LYS A 159      90.339 -23.138   9.253  1.00  0.00           C
ATOM   2432  O   LYS A 159      91.210 -23.983   9.443  1.00  0.00           O
ATOM   2433  CB  LYS A 159      91.416 -20.935   9.767  1.00  0.00           C
ATOM   2434  CG  LYS A 159      91.305 -20.362   8.361  1.00  0.00           C
ATOM   2435  CD  LYS A 159      92.331 -19.270   8.101  1.00  0.00           C
ATOM   2436  CE  LYS A 159      92.118 -18.626   6.731  1.00  0.00           C
ATOM   2437  NZ  LYS A 159      92.219 -19.605   5.605  1.00  0.00           N
ATOM   2438  H   LYS A 159      91.143 -22.092  12.064  1.00  0.00           H
ATOM   2439  HA  LYS A 159      89.320 -21.389   9.922  1.00  0.00           H
ATOM   2440  HB2 LYS A 159      92.371 -21.455   9.871  1.00  0.00           H
ATOM   2441  HB3 LYS A 159      91.399 -20.109  10.479  1.00  0.00           H
ATOM   2442  HG2 LYS A 159      91.438 -21.169   7.640  1.00  0.00           H
ATOM   2443  HG3 LYS A 159      90.306 -19.940   8.233  1.00  0.00           H
ATOM   2444  HD2 LYS A 159      93.336 -19.695   8.158  1.00  0.00           H
ATOM   2445  HD3 LYS A 159      92.234 -18.497   8.866  1.00  0.00           H
ATOM   2446  HE2 LYS A 159      92.858 -17.832   6.600  1.00  0.00           H
ATOM   2447  HE3 LYS A 159      91.128 -18.160   6.725  1.00  0.00           H
ATOM   2448  HZ1 LYS A 159      92.043 -19.155   4.716  1.00  0.00           H
ATOM   2449  HZ2 LYS A 159      91.545 -20.352   5.729  1.00  0.00           H
ATOM   2450  HZ3 LYS A 159      93.138 -20.045   5.584  1.00  0.00           H
ATOM   2451  N   ASP A 160      89.403 -23.270   8.321  1.00  0.00           N
ATOM   2452  CA  ASP A 160      89.296 -24.499   7.549  1.00  0.00           C
ATOM   2453  C   ASP A 160      90.326 -24.549   6.428  1.00  0.00           C
ATOM   2454  O   ASP A 160      90.369 -23.665   5.570  1.00  0.00           O
ATOM   2455  CB  ASP A 160      87.889 -24.653   6.976  1.00  0.00           C
ATOM   2456  CG  ASP A 160      87.653 -26.022   6.366  1.00  0.00           C
ATOM   2457  OD1 ASP A 160      88.639 -26.737   6.105  1.00  0.00           O
ATOM   2458  OD2 ASP A 160      86.477 -26.388   6.148  1.00  0.00           O
ATOM   2459  H   ASP A 160      88.718 -22.539   8.176  1.00  0.00           H
ATOM   2460  HA  ASP A 160      89.467 -25.345   8.218  1.00  0.00           H
ATOM   2461  HB2 ASP A 160      87.756 -23.910   6.190  1.00  0.00           H
ATOM   2462  HB3 ASP A 160      87.140 -24.439   7.735  1.00  0.00           H
ATOM   2463  N   GLU A 161      91.152 -25.590   6.444  1.00  0.00           N
ATOM   2464  CA  GLU A 161      92.077 -25.839   5.345  1.00  0.00           C
ATOM   2465  C   GLU A 161      92.135 -27.320   4.963  1.00  0.00           C
ATOM   2466  O   GLU A 161      93.055 -27.760   4.277  1.00  0.00           O
ATOM   2467  CB  GLU A 161      93.467 -25.280   5.667  1.00  0.00           C
ATOM   2468  CG  GLU A 161      93.549 -23.763   5.520  1.00  0.00           C
ATOM   2469  CD  GLU A 161      94.905 -23.207   5.890  1.00  0.00           C
ATOM   2470  OE1 GLU A 161      95.655 -23.898   6.611  1.00  0.00           O
ATOM   2471  OE2 GLU A 161      95.221 -22.077   5.461  1.00  0.00           O
ATOM   2472  H   GLU A 161      91.067 -26.270   7.186  1.00  0.00           H
ATOM   2473  HA  GLU A 161      91.721 -25.337   4.449  1.00  0.00           H
ATOM   2474  HB2 GLU A 161      94.204 -25.700   4.983  1.00  0.00           H
ATOM   2475  HB3 GLU A 161      93.733 -25.579   6.683  1.00  0.00           H
ATOM   2476  HG2 GLU A 161      93.306 -23.492   4.489  1.00  0.00           H
ATOM   2477  HG3 GLU A 161      92.818 -23.291   6.178  1.00  0.00           H
ATOM   2478  N   THR A 162      91.135 -28.079   5.399  1.00  0.00           N
ATOM   2479  CA  THR A 162      91.043 -29.495   5.056  1.00  0.00           C
ATOM   2480  C   THR A 162      89.800 -29.813   4.225  1.00  0.00           C
ATOM   2481  O   THR A 162      89.827 -30.688   3.364  1.00  0.00           O
ATOM   2482  CB  THR A 162      91.045 -30.384   6.315  1.00  0.00           C
ATOM   2483  OG1 THR A 162      90.196 -29.802   7.310  1.00  0.00           O
ATOM   2484  CG2 THR A 162      92.453 -30.512   6.878  1.00  0.00           C
ATOM   2485  H   THR A 162      90.372 -27.647   5.918  1.00  0.00           H
ATOM   2486  HA  THR A 162      91.891 -29.797   4.442  1.00  0.00           H
ATOM   2487  HB  THR A 162      90.681 -31.381   6.063  1.00  0.00           H
ATOM   2488 HG21 THR A 162      92.427 -31.142   7.766  1.00  0.00           H
ATOM   2489 HG22 THR A 162      92.833 -29.528   7.153  1.00  0.00           H
ATOM   2490 HG23 THR A 162      93.110 -30.961   6.135  1.00  0.00           H
ATOM   2491  HG1 THR A 162      89.276 -29.922   7.052  1.00  0.00           H
ATOM   2492  N   ASN A 163      88.711 -29.099   4.481  1.00  0.00           N
ATOM   2493  CA  ASN A 163      87.443 -29.416   3.839  1.00  0.00           C
ATOM   2494  C   ASN A 163      87.205 -28.687   2.524  1.00  0.00           C
ATOM   2495  O   ASN A 163      87.769 -27.619   2.273  1.00  0.00           O
ATOM   2496  CB  ASN A 163      86.280 -29.148   4.791  1.00  0.00           C
ATOM   2497  CG  ASN A 163      86.402 -29.923   6.083  1.00  0.00           C
ATOM   2498  OD1 ASN A 163      86.501 -31.149   6.077  1.00  0.00           O
ATOM   2499  ND2 ASN A 163      86.398 -29.209   7.200  1.00  0.00           N
ATOM   2500  H   ASN A 163      88.741 -28.320   5.137  1.00  0.00           H
ATOM   2501  HA  ASN A 163      87.428 -30.486   3.620  1.00  0.00           H
ATOM   2502  HB2 ASN A 163      85.373 -29.523   4.321  1.00  0.00           H
ATOM   2503  HB3 ASN A 163      86.101 -28.106   4.893  1.00  0.00           H
ATOM   2504 HD21 ASN A 163      86.452 -29.684   8.082  1.00  0.00           H
ATOM   2505 HD22 ASN A 163      86.369 -28.194   7.107  1.00  0.00           H
ATOM   2506  N   GLU A 164      86.362 -29.289   1.694  1.00  0.00           N
ATOM   2507  CA  GLU A 164      85.913 -28.690   0.448  1.00  0.00           C
ATOM   2508  C   GLU A 164      85.273 -27.328   0.711  1.00  0.00           C
ATOM   2509  O   GLU A 164      84.494 -27.171   1.652  1.00  0.00           O
ATOM   2510  CB  GLU A 164      84.905 -29.623  -0.223  1.00  0.00           C
ATOM   2511  CG  GLU A 164      84.327 -29.107  -1.524  1.00  0.00           C
ATOM   2512  CD  GLU A 164      83.067 -29.853  -1.931  1.00  0.00           C
ATOM   2513  OE1 GLU A 164      82.484 -30.555  -1.075  1.00  0.00           O
ATOM   2514  OE2 GLU A 164      82.655 -29.732  -3.105  1.00  0.00           O
ATOM   2515  H   GLU A 164      85.906 -30.134   1.997  1.00  0.00           H
ATOM   2516  HA  GLU A 164      86.767 -28.562  -0.215  1.00  0.00           H
ATOM   2517  HB2 GLU A 164      85.379 -30.589  -0.407  1.00  0.00           H
ATOM   2518  HB3 GLU A 164      84.107 -29.770   0.506  1.00  0.00           H
ATOM   2519  HG2 GLU A 164      85.090 -29.193  -2.302  1.00  0.00           H
ATOM   2520  HG3 GLU A 164      84.063 -28.056  -1.433  1.00  0.00           H
ATOM   2521  N   LYS A 165      85.602 -26.350  -0.127  1.00  0.00           N
ATOM   2522  CA  LYS A 165      85.081 -24.993   0.022  1.00  0.00           C
ATOM   2523  C   LYS A 165      83.583 -24.926  -0.275  1.00  0.00           C
ATOM   2524  O   LYS A 165      83.115 -25.471  -1.271  1.00  0.00           O
ATOM   2525  CB  LYS A 165      85.852 -24.027  -0.887  1.00  0.00           C
ATOM   2526  CG  LYS A 165      87.324 -23.851  -0.498  1.00  0.00           C
ATOM   2527  CD  LYS A 165      87.470 -23.003   0.770  1.00  0.00           C
ATOM   2528  CE  LYS A 165      88.871 -23.096   1.371  1.00  0.00           C
ATOM   2529  NZ  LYS A 165      88.980 -24.177   2.398  1.00  0.00           N
ATOM   2530  H   LYS A 165      86.094 -26.593  -0.972  1.00  0.00           H
ATOM   2531  HA  LYS A 165      85.197 -24.700   1.063  1.00  0.00           H
ATOM   2532  HB2 LYS A 165      85.364 -23.051  -0.873  1.00  0.00           H
ATOM   2533  HB3 LYS A 165      85.803 -24.402  -1.911  1.00  0.00           H
ATOM   2534  HG2 LYS A 165      87.851 -23.353  -1.313  1.00  0.00           H
ATOM   2535  HG3 LYS A 165      87.783 -24.829  -0.345  1.00  0.00           H
ATOM   2536  HD2 LYS A 165      86.736 -23.288   1.525  1.00  0.00           H
ATOM   2537  HD3 LYS A 165      87.275 -21.963   0.502  1.00  0.00           H
ATOM   2538  HE2 LYS A 165      89.603 -23.242   0.571  1.00  0.00           H
ATOM   2539  HE3 LYS A 165      89.090 -22.137   1.851  1.00  0.00           H
ATOM   2540  HZ1 LYS A 165      88.871 -25.106   1.999  1.00  0.00           H
ATOM   2541  HZ2 LYS A 165      89.858 -24.143   2.906  1.00  0.00           H
ATOM   2542  HZ3 LYS A 165      88.252 -24.097   3.099  1.00  0.00           H
ATOM   2543  N   LEU A 166      82.835 -24.257   0.599  1.00  0.00           N
ATOM   2544  CA  LEU A 166      81.386 -24.159   0.458  1.00  0.00           C
ATOM   2545  C   LEU A 166      80.975 -23.076  -0.531  1.00  0.00           C
ATOM   2546  O   LEU A 166      79.910 -23.155  -1.142  1.00  0.00           O
ATOM   2547  CB  LEU A 166      80.716 -23.889   1.809  1.00  0.00           C
ATOM   2548  CG  LEU A 166      80.841 -24.945   2.909  1.00  0.00           C
ATOM   2549  CD1 LEU A 166      80.117 -24.480   4.165  1.00  0.00           C
ATOM   2550  CD2 LEU A 166      80.297 -26.286   2.444  1.00  0.00           C
ATOM   2551  H   LEU A 166      83.256 -23.958   1.471  1.00  0.00           H
ATOM   2552  HA  LEU A 166      80.993 -25.097   0.058  1.00  0.00           H
ATOM   2553  HB2 LEU A 166      81.107 -22.949   2.200  1.00  0.00           H
ATOM   2554  HB3 LEU A 166      79.650 -23.738   1.624  1.00  0.00           H
ATOM   2555  HG  LEU A 166      81.894 -25.074   3.158  1.00  0.00           H
ATOM   2556 HD21 LEU A 166      80.888 -26.673   1.614  1.00  0.00           H
ATOM   2557 HD22 LEU A 166      80.358 -26.987   3.267  1.00  0.00           H
ATOM   2558 HD23 LEU A 166      79.255 -26.187   2.130  1.00  0.00           H
ATOM   2559 HD11 LEU A 166      80.223 -25.224   4.953  1.00  0.00           H
ATOM   2560 HD12 LEU A 166      79.055 -24.349   3.952  1.00  0.00           H
ATOM   2561 HD13 LEU A 166      80.531 -23.534   4.511  1.00  0.00           H
ATOM   2562  N   GLY A 167      81.816 -22.059  -0.676  1.00  0.00           N
ATOM   2563  CA  GLY A 167      81.462 -20.895  -1.467  1.00  0.00           C
ATOM   2564  C   GLY A 167      80.714 -19.905  -0.596  1.00  0.00           C
ATOM   2565  O   GLY A 167      81.173 -18.787  -0.357  1.00  0.00           O
ATOM   2566  H   GLY A 167      82.663 -22.064  -0.136  1.00  0.00           H
ATOM   2567  HA2 GLY A 167      82.362 -20.420  -1.853  1.00  0.00           H
ATOM   2568  HA3 GLY A 167      80.828 -21.177  -2.312  1.00  0.00           H
ATOM   2569  N   ARG A 168      79.550 -20.328  -0.118  1.00  0.00           N
ATOM   2570  CA  ARG A 168      78.794 -19.577   0.878  1.00  0.00           C
ATOM   2571  C   ARG A 168      77.767 -20.504   1.496  1.00  0.00           C
ATOM   2572  O   ARG A 168      77.065 -21.228   0.786  1.00  0.00           O
ATOM   2573  CB  ARG A 168      78.085 -18.370   0.256  1.00  0.00           C
ATOM   2574  CG  ARG A 168      77.524 -17.386   1.274  1.00  0.00           C
ATOM   2575  CD  ARG A 168      76.416 -16.515   0.679  1.00  0.00           C
ATOM   2576  NE  ARG A 168      75.320 -17.333   0.171  1.00  0.00           N
ATOM   2577  CZ  ARG A 168      75.038 -17.501  -1.117  1.00  0.00           C
ATOM   2578  NH1 ARG A 168      75.762 -16.882  -2.048  1.00  0.00           N
ATOM   2579  NH2 ARG A 168      74.022 -18.280  -1.470  1.00  0.00           N
ATOM   2580  H   ARG A 168      79.197 -21.238  -0.418  1.00  0.00           H
ATOM   2581  HA  ARG A 168      79.468 -19.234   1.662  1.00  0.00           H
ATOM   2582  HB2 ARG A 168      78.775 -17.821  -0.383  1.00  0.00           H
ATOM   2583  HB3 ARG A 168      77.304 -18.768  -0.388  1.00  0.00           H
ATOM   2584  HG2 ARG A 168      78.328 -16.752   1.650  1.00  0.00           H
ATOM   2585  HG3 ARG A 168      77.102 -17.925   2.122  1.00  0.00           H
ATOM   2586  HD2 ARG A 168      76.027 -15.879   1.477  1.00  0.00           H
ATOM   2587  HD3 ARG A 168      76.838 -15.855  -0.078  1.00  0.00           H
ATOM   2588  HE  ARG A 168      74.799 -17.893   0.842  1.00  0.00           H
ATOM   2589 HH11 ARG A 168      75.534 -17.112  -3.013  1.00  0.00           H
ATOM   2590 HH12 ARG A 168      76.422 -16.181  -1.787  1.00  0.00           H
ATOM   2591 HH21 ARG A 168      73.934 -18.530  -2.451  1.00  0.00           H
ATOM   2592 HH22 ARG A 168      73.562 -18.840  -0.755  1.00  0.00           H
ATOM   2593  N   GLY A 169      77.688 -20.488   2.819  1.00  0.00           N
ATOM   2594  CA  GLY A 169      76.677 -21.252   3.519  1.00  0.00           C
ATOM   2595  C   GLY A 169      77.223 -22.030   4.698  1.00  0.00           C
ATOM   2596  O   GLY A 169      78.312 -21.759   5.204  1.00  0.00           O
ATOM   2597  H   GLY A 169      78.283 -19.873   3.360  1.00  0.00           H
ATOM   2598  HA2 GLY A 169      76.214 -21.969   2.850  1.00  0.00           H
ATOM   2599  HA3 GLY A 169      75.896 -20.586   3.885  1.00  0.00           H
ATOM   2600  N   THR A 170      76.464 -23.031   5.118  1.00  0.00           N
ATOM   2601  CA  THR A 170      76.791 -23.761   6.325  1.00  0.00           C
ATOM   2602  C   THR A 170      76.534 -25.247   6.158  1.00  0.00           C
ATOM   2603  O   THR A 170      75.608 -25.654   5.461  1.00  0.00           O
ATOM   2604  CB  THR A 170      75.983 -23.204   7.497  1.00  0.00           C
ATOM   2605  OG1 THR A 170      76.348 -21.831   7.691  1.00  0.00           O
ATOM   2606  CG2 THR A 170      76.256 -23.985   8.775  1.00  0.00           C
ATOM   2607  H   THR A 170      75.602 -23.255   4.624  1.00  0.00           H
ATOM   2608  HA  THR A 170      77.842 -23.632   6.558  1.00  0.00           H
ATOM   2609  HB  THR A 170      74.918 -23.260   7.273  1.00  0.00           H
ATOM   2610  HG1 THR A 170      75.631 -21.323   7.260  1.00  0.00           H
ATOM   2611 HG21 THR A 170      75.785 -23.460   9.607  1.00  0.00           H
ATOM   2612 HG22 THR A 170      75.812 -24.978   8.720  1.00  0.00           H
ATOM   2613 HG23 THR A 170      77.327 -24.045   8.958  1.00  0.00           H
ATOM   2614  N   LYS A 171      77.370 -26.055   6.797  1.00  0.00           N
ATOM   2615  CA  LYS A 171      77.220 -27.501   6.761  1.00  0.00           C
ATOM   2616  C   LYS A 171      77.221 -28.005   8.194  1.00  0.00           C
ATOM   2617  O   LYS A 171      78.243 -27.927   8.865  1.00  0.00           O
ATOM   2618  CB  LYS A 171      78.400 -28.114   6.013  1.00  0.00           C
ATOM   2619  CG  LYS A 171      78.074 -29.310   5.156  1.00  0.00           C
ATOM   2620  CD  LYS A 171      79.323 -29.801   4.421  1.00  0.00           C
ATOM   2621  CE  LYS A 171      78.971 -30.778   3.303  1.00  0.00           C
ATOM   2622  NZ  LYS A 171      80.183 -31.389   2.681  1.00  0.00           N
ATOM   2623  H   LYS A 171      78.129 -25.645   7.329  1.00  0.00           H
ATOM   2624  HA  LYS A 171      76.280 -27.786   6.285  1.00  0.00           H
ATOM   2625  HB2 LYS A 171      79.211 -28.377   6.692  1.00  0.00           H
ATOM   2626  HB3 LYS A 171      78.798 -27.353   5.338  1.00  0.00           H
ATOM   2627  HG2 LYS A 171      77.676 -30.105   5.781  1.00  0.00           H
ATOM   2628  HG3 LYS A 171      77.334 -29.007   4.422  1.00  0.00           H
ATOM   2629  HD2 LYS A 171      79.981 -30.287   5.143  1.00  0.00           H
ATOM   2630  HD3 LYS A 171      79.848 -28.957   3.982  1.00  0.00           H
ATOM   2631  HE2 LYS A 171      78.388 -30.240   2.543  1.00  0.00           H
ATOM   2632  HE3 LYS A 171      78.327 -31.561   3.713  1.00  0.00           H
ATOM   2633  HZ1 LYS A 171      79.909 -32.018   1.937  1.00  0.00           H
ATOM   2634  HZ2 LYS A 171      80.739 -31.887   3.360  1.00  0.00           H
ATOM   2635  HZ3 LYS A 171      80.745 -30.666   2.241  1.00  0.00           H
ATOM   2636  N   ILE A 172      76.082 -28.499   8.674  1.00  0.00           N
ATOM   2637  CA  ILE A 172      76.007 -29.081  10.014  1.00  0.00           C
ATOM   2638  C   ILE A 172      76.164 -30.592   9.918  1.00  0.00           C
ATOM   2639  O   ILE A 172      75.361 -31.271   9.277  1.00  0.00           O
ATOM   2640  CB  ILE A 172      74.660 -28.806  10.702  1.00  0.00           C
ATOM   2641  CG1 ILE A 172      74.204 -27.356  10.487  1.00  0.00           C
ATOM   2642  CG2 ILE A 172      74.736 -29.161  12.186  1.00  0.00           C
ATOM   2643  CD1 ILE A 172      74.865 -26.349  11.396  1.00  0.00           C
ATOM   2644  H   ILE A 172      75.244 -28.468   8.098  1.00  0.00           H
ATOM   2645  HA  ILE A 172      76.799 -28.672  10.643  1.00  0.00           H
ATOM   2646  HB  ILE A 172      73.894 -29.432  10.241  1.00  0.00           H
ATOM   2647 HG12 ILE A 172      74.296 -27.033   9.451  1.00  0.00           H
ATOM   2648 HG13 ILE A 172      73.136 -27.319  10.705  1.00  0.00           H
ATOM   2649 HD11 ILE A 172      74.549 -25.347  11.104  1.00  0.00           H
ATOM   2650 HD12 ILE A 172      74.574 -26.505  12.432  1.00  0.00           H
ATOM   2651 HD13 ILE A 172      75.944 -26.418  11.289  1.00  0.00           H
ATOM   2652 HG21 ILE A 172      74.870 -30.235  12.295  1.00  0.00           H
ATOM   2653 HG22 ILE A 172      75.575 -28.660  12.669  1.00  0.00           H
ATOM   2654 HG23 ILE A 172      73.807 -28.880  12.684  1.00  0.00           H
ATOM   2655  N   ILE A 173      77.202 -31.123  10.548  1.00  0.00           N
ATOM   2656  CA  ILE A 173      77.446 -32.558  10.497  1.00  0.00           C
ATOM   2657  C   ILE A 173      77.168 -33.210  11.849  1.00  0.00           C
ATOM   2658  O   ILE A 173      77.849 -32.934  12.831  1.00  0.00           O
ATOM   2659  CB  ILE A 173      78.873 -32.854  10.040  1.00  0.00           C
ATOM   2660  CG1 ILE A 173      79.174 -32.044   8.769  1.00  0.00           C
ATOM   2661  CG2 ILE A 173      79.048 -34.343   9.806  1.00  0.00           C
ATOM   2662  CD1 ILE A 173      80.473 -32.401   8.094  1.00  0.00           C
ATOM   2663  H   ILE A 173      77.837 -30.525  11.059  1.00  0.00           H
ATOM   2664  HA  ILE A 173      76.785 -33.028   9.770  1.00  0.00           H
ATOM   2665  HB  ILE A 173      79.555 -32.557  10.820  1.00  0.00           H
ATOM   2666 HG12 ILE A 173      79.232 -30.984   9.022  1.00  0.00           H
ATOM   2667 HG13 ILE A 173      78.367 -32.180   8.047  1.00  0.00           H
ATOM   2668 HD11 ILE A 173      80.682 -31.670   7.313  1.00  0.00           H
ATOM   2669 HD12 ILE A 173      81.288 -32.383   8.819  1.00  0.00           H
ATOM   2670 HD13 ILE A 173      80.408 -33.386   7.632  1.00  0.00           H
ATOM   2671 HG21 ILE A 173      78.766 -34.916  10.690  1.00  0.00           H
ATOM   2672 HG22 ILE A 173      78.447 -34.679   8.961  1.00  0.00           H
ATOM   2673 HG23 ILE A 173      80.094 -34.577   9.608  1.00  0.00           H
ATOM   2674  N   LEU A 174      76.146 -34.056  11.901  1.00  0.00           N
ATOM   2675  CA  LEU A 174      75.810 -34.744  13.135  1.00  0.00           C
ATOM   2676  C   LEU A 174      76.388 -36.144  13.125  1.00  0.00           C
ATOM   2677  O   LEU A 174      76.076 -36.948  12.243  1.00  0.00           O
ATOM   2678  CB  LEU A 174      74.296 -34.829  13.319  1.00  0.00           C
ATOM   2679  CG  LEU A 174      73.477 -33.567  13.058  1.00  0.00           C
ATOM   2680  CD1 LEU A 174      72.012 -33.834  13.351  1.00  0.00           C
ATOM   2681  CD2 LEU A 174      73.986 -32.432  13.905  1.00  0.00           C
ATOM   2682  H   LEU A 174      75.588 -34.239  11.073  1.00  0.00           H
ATOM   2683  HA  LEU A 174      76.216 -34.206  13.994  1.00  0.00           H
ATOM   2684  HB2 LEU A 174      73.914 -35.592  12.639  1.00  0.00           H
ATOM   2685  HB3 LEU A 174      74.095 -35.175  14.326  1.00  0.00           H
ATOM   2686  HG  LEU A 174      73.561 -33.282  12.010  1.00  0.00           H
ATOM   2687 HD11 LEU A 174      71.425 -32.961  13.083  1.00  0.00           H
ATOM   2688 HD12 LEU A 174      71.671 -34.680  12.755  1.00  0.00           H
ATOM   2689 HD13 LEU A 174      71.874 -34.057  14.409  1.00  0.00           H
ATOM   2690 HD21 LEU A 174      73.333 -31.566  13.804  1.00  0.00           H
ATOM   2691 HD22 LEU A 174      74.989 -32.150  13.591  1.00  0.00           H
ATOM   2692 HD23 LEU A 174      74.023 -32.751  14.942  1.00  0.00           H
ATOM   2693  N   HIS A 175      77.233 -36.434  14.106  1.00  0.00           N
ATOM   2694  CA  HIS A 175      77.695 -37.798  14.325  1.00  0.00           C
ATOM   2695  C   HIS A 175      76.712 -38.480  15.265  1.00  0.00           C
ATOM   2696  O   HIS A 175      76.731 -38.256  16.474  1.00  0.00           O
ATOM   2697  CB  HIS A 175      79.111 -37.795  14.892  1.00  0.00           C
ATOM   2698  CG  HIS A 175      80.108 -37.143  13.986  1.00  0.00           C
ATOM   2699  ND1 HIS A 175      81.023 -37.859  13.247  1.00  0.00           N
ATOM   2700  CD2 HIS A 175      80.308 -35.840  13.676  1.00  0.00           C
ATOM   2701  CE1 HIS A 175      81.759 -37.024  12.533  1.00  0.00           C
ATOM   2702  NE2 HIS A 175      81.344 -35.793  12.774  1.00  0.00           N
ATOM   2703  H   HIS A 175      77.454 -35.737  14.811  1.00  0.00           H
ATOM   2704  HA  HIS A 175      77.721 -38.359  13.388  1.00  0.00           H
ATOM   2705  HB2 HIS A 175      79.420 -38.826  15.069  1.00  0.00           H
ATOM   2706  HB3 HIS A 175      79.114 -37.276  15.848  1.00  0.00           H
ATOM   2707  HD2 HIS A 175      79.739 -35.006  14.065  1.00  0.00           H
ATOM   2708  HE1 HIS A 175      82.550 -37.312  11.853  1.00  0.00           H
ATOM   2709  HE2 HIS A 175      81.722 -34.960  12.348  1.00  0.00           H
ATOM   2710  N   LEU A 176      75.835 -39.292  14.688  1.00  0.00           N
ATOM   2711  CA  LEU A 176      74.704 -39.845  15.415  1.00  0.00           C
ATOM   2712  C   LEU A 176      75.128 -40.829  16.484  1.00  0.00           C
ATOM   2713  O   LEU A 176      76.088 -41.579  16.304  1.00  0.00           O
ATOM   2714  CB  LEU A 176      73.729 -40.527  14.447  1.00  0.00           C
ATOM   2715  CG  LEU A 176      73.135 -39.607  13.374  1.00  0.00           C
ATOM   2716  CD1 LEU A 176      72.286 -40.401  12.386  1.00  0.00           C
ATOM   2717  CD2 LEU A 176      72.315 -38.495  14.015  1.00  0.00           C
ATOM   2718  H   LEU A 176      76.003 -39.598  13.736  1.00  0.00           H
ATOM   2719  HA  LEU A 176      74.191 -39.027  15.915  1.00  0.00           H
ATOM   2720  HB2 LEU A 176      72.913 -40.970  15.021  1.00  0.00           H
ATOM   2721  HB3 LEU A 176      74.261 -41.342  13.952  1.00  0.00           H
ATOM   2722  HG  LEU A 176      73.943 -39.148  12.804  1.00  0.00           H
ATOM   2723 HD21 LEU A 176      72.963 -37.832  14.586  1.00  0.00           H
ATOM   2724 HD22 LEU A 176      71.557 -38.924  14.670  1.00  0.00           H
ATOM   2725 HD23 LEU A 176      71.831 -37.907  13.237  1.00  0.00           H
ATOM   2726 HD11 LEU A 176      72.913 -41.175  11.947  1.00  0.00           H
ATOM   2727 HD12 LEU A 176      71.916 -39.744  11.601  1.00  0.00           H
ATOM   2728 HD13 LEU A 176      71.449 -40.867  12.906  1.00  0.00           H
ATOM   2729  N   LYS A 177      74.400 -40.811  17.599  1.00  0.00           N
ATOM   2730  CA  LYS A 177      74.539 -41.818  18.640  1.00  0.00           C
ATOM   2731  C   LYS A 177      74.192 -43.193  18.092  1.00  0.00           C
ATOM   2732  O   LYS A 177      73.412 -43.325  17.141  1.00  0.00           O
ATOM   2733  CB  LYS A 177      73.619 -41.502  19.821  1.00  0.00           C
ATOM   2734  CG  LYS A 177      73.923 -40.193  20.528  1.00  0.00           C
ATOM   2735  CD  LYS A 177      72.868 -39.905  21.576  1.00  0.00           C
ATOM   2736  CE  LYS A 177      73.024 -38.517  22.158  1.00  0.00           C
ATOM   2737  NZ  LYS A 177      71.942 -38.225  23.150  1.00  0.00           N
ATOM   2738  H   LYS A 177      73.624 -40.167  17.647  1.00  0.00           H
ATOM   2739  HA  LYS A 177      75.580 -41.835  18.981  1.00  0.00           H
ATOM   2740  HB2 LYS A 177      73.690 -42.310  20.552  1.00  0.00           H
ATOM   2741  HB3 LYS A 177      72.596 -41.477  19.450  1.00  0.00           H
ATOM   2742  HG2 LYS A 177      73.954 -39.375  19.813  1.00  0.00           H
ATOM   2743  HG3 LYS A 177      74.891 -40.273  21.009  1.00  0.00           H
ATOM   2744  HD2 LYS A 177      72.948 -40.654  22.366  1.00  0.00           H
ATOM   2745  HD3 LYS A 177      71.883 -39.987  21.113  1.00  0.00           H
ATOM   2746  HE2 LYS A 177      73.007 -37.784  21.344  1.00  0.00           H
ATOM   2747  HE3 LYS A 177      74.014 -38.452  22.626  1.00  0.00           H
ATOM   2748  HZ1 LYS A 177      71.995 -38.882  23.915  1.00  0.00           H
ATOM   2749  HZ2 LYS A 177      72.080 -37.276  23.485  1.00  0.00           H
ATOM   2750  HZ3 LYS A 177      71.054 -38.272  22.668  1.00  0.00           H
ATOM   2751  N   GLU A 178      74.753 -44.219  18.715  1.00  0.00           N
ATOM   2752  CA  GLU A 178      74.615 -45.581  18.220  1.00  0.00           C
ATOM   2753  C   GLU A 178      73.161 -46.051  18.159  1.00  0.00           C
ATOM   2754  O   GLU A 178      72.807 -46.876  17.325  1.00  0.00           O
ATOM   2755  CB  GLU A 178      75.450 -46.539  19.075  1.00  0.00           C
ATOM   2756  CG  GLU A 178      75.900 -47.783  18.332  1.00  0.00           C
ATOM   2757  CD  GLU A 178      76.696 -47.462  17.073  1.00  0.00           C
ATOM   2758  OE1 GLU A 178      77.140 -46.302  16.917  1.00  0.00           O
ATOM   2759  OE2 GLU A 178      76.881 -48.375  16.238  1.00  0.00           O
ATOM   2760  H   GLU A 178      75.481 -44.019  19.382  1.00  0.00           H
ATOM   2761  HA  GLU A 178      74.966 -45.577  17.189  1.00  0.00           H
ATOM   2762  HB2 GLU A 178      76.343 -46.020  19.429  1.00  0.00           H
ATOM   2763  HB3 GLU A 178      74.879 -46.833  19.958  1.00  0.00           H
ATOM   2764  HG2 GLU A 178      76.518 -48.383  19.005  1.00  0.00           H
ATOM   2765  HG3 GLU A 178      75.022 -48.379  18.072  1.00  0.00           H
ATOM   2766  N   ASP A 179      72.321 -45.530  19.044  1.00  0.00           N
ATOM   2767  CA  ASP A 179      70.926 -45.947  19.092  1.00  0.00           C
ATOM   2768  C   ASP A 179      69.992 -44.999  18.333  1.00  0.00           C
ATOM   2769  O   ASP A 179      68.768 -45.107  18.439  1.00  0.00           O
ATOM   2770  CB  ASP A 179      70.464 -46.091  20.543  1.00  0.00           C
ATOM   2771  CG  ASP A 179      70.507 -44.775  21.305  1.00  0.00           C
ATOM   2772  OD1 ASP A 179      71.403 -43.948  21.025  1.00  0.00           O
ATOM   2773  OD2 ASP A 179      69.647 -44.570  22.189  1.00  0.00           O
ATOM   2774  H   ASP A 179      72.621 -44.821  19.708  1.00  0.00           H
ATOM   2775  HA  ASP A 179      70.820 -46.926  18.627  1.00  0.00           H
ATOM   2776  HB2 ASP A 179      71.112 -46.809  21.049  1.00  0.00           H
ATOM   2777  HB3 ASP A 179      69.450 -46.495  20.563  1.00  0.00           H
ATOM   2778  N   GLN A 180      70.562 -44.077  17.564  1.00  0.00           N
ATOM   2779  CA  GLN A 180      69.748 -43.105  16.833  1.00  0.00           C
ATOM   2780  C   GLN A 180      69.960 -43.182  15.328  1.00  0.00           C
ATOM   2781  O   GLN A 180      69.809 -42.182  14.623  1.00  0.00           O
ATOM   2782  CB  GLN A 180      70.051 -41.687  17.323  1.00  0.00           C
ATOM   2783  CG  GLN A 180      69.787 -41.471  18.799  1.00  0.00           C
ATOM   2784  CD  GLN A 180      68.339 -41.711  19.186  1.00  0.00           C
ATOM   2785  OE1 GLN A 180      68.052 -42.211  20.273  1.00  0.00           O
ATOM   2786  NE2 GLN A 180      67.420 -41.360  18.298  1.00  0.00           N
ATOM   2787  H   GLN A 180      71.577 -44.005  17.545  1.00  0.00           H
ATOM   2788  HA  GLN A 180      68.689 -43.308  16.986  1.00  0.00           H
ATOM   2789  HB2 GLN A 180      69.477 -40.955  16.756  1.00  0.00           H
ATOM   2790  HB3 GLN A 180      71.106 -41.476  17.137  1.00  0.00           H
ATOM   2791  HG2 GLN A 180      70.049 -40.453  19.057  1.00  0.00           H
ATOM   2792  HG3 GLN A 180      70.415 -42.138  19.387  1.00  0.00           H
ATOM   2793 HE21 GLN A 180      66.547 -41.845  18.443  1.00  0.00           H
ATOM   2794 HE22 GLN A 180      67.751 -41.225  17.362  1.00  0.00           H
ATOM   2795  N   LEU A 181      70.308 -44.364  14.830  1.00  0.00           N
ATOM   2796  CA  LEU A 181      70.630 -44.511  13.410  1.00  0.00           C
ATOM   2797  C   LEU A 181      69.404 -44.478  12.504  1.00  0.00           C
ATOM   2798  O   LEU A 181      69.532 -44.408  11.283  1.00  0.00           O
ATOM   2799  CB  LEU A 181      71.448 -45.779  13.154  1.00  0.00           C
ATOM   2800  CG  LEU A 181      72.778 -45.820  13.912  1.00  0.00           C
ATOM   2801  CD1 LEU A 181      73.660 -46.934  13.384  1.00  0.00           C
ATOM   2802  CD2 LEU A 181      73.486 -44.485  13.806  1.00  0.00           C
ATOM   2803  H   LEU A 181      70.529 -45.111  15.475  1.00  0.00           H
ATOM   2804  HA  LEU A 181      71.218 -43.647  13.098  1.00  0.00           H
ATOM   2805  HB2 LEU A 181      71.663 -45.833  12.086  1.00  0.00           H
ATOM   2806  HB3 LEU A 181      70.858 -46.655  13.427  1.00  0.00           H
ATOM   2807  HG  LEU A 181      72.570 -46.012  14.960  1.00  0.00           H
ATOM   2808 HD21 LEU A 181      74.487 -44.583  14.230  1.00  0.00           H
ATOM   2809 HD22 LEU A 181      73.577 -44.173  12.767  1.00  0.00           H
ATOM   2810 HD23 LEU A 181      72.983 -43.723  14.400  1.00  0.00           H
ATOM   2811 HD11 LEU A 181      73.135 -47.885  13.452  1.00  0.00           H
ATOM   2812 HD12 LEU A 181      74.560 -46.994  14.001  1.00  0.00           H
ATOM   2813 HD13 LEU A 181      73.950 -46.732  12.353  1.00  0.00           H
ATOM   2814  N   GLU A 182      68.217 -44.527  13.098  1.00  0.00           N
ATOM   2815  CA  GLU A 182      66.995 -44.461  12.308  1.00  0.00           C
ATOM   2816  C   GLU A 182      66.979 -43.204  11.435  1.00  0.00           C
ATOM   2817  O   GLU A 182      66.339 -43.180  10.391  1.00  0.00           O
ATOM   2818  CB  GLU A 182      65.757 -44.489  13.210  1.00  0.00           C
ATOM   2819  CG  GLU A 182      65.584 -43.232  14.074  1.00  0.00           C
ATOM   2820  CD  GLU A 182      64.606 -43.446  15.223  1.00  0.00           C
ATOM   2821  OE1 GLU A 182      64.959 -44.173  16.177  1.00  0.00           O
ATOM   2822  OE2 GLU A 182      63.487 -42.892  15.172  1.00  0.00           O
ATOM   2823  H   GLU A 182      68.161 -44.621  14.101  1.00  0.00           H
ATOM   2824  HA  GLU A 182      66.950 -45.329  11.648  1.00  0.00           H
ATOM   2825  HB2 GLU A 182      65.832 -45.364  13.857  1.00  0.00           H
ATOM   2826  HB3 GLU A 182      64.866 -44.607  12.591  1.00  0.00           H
ATOM   2827  HG2 GLU A 182      65.236 -42.410  13.443  1.00  0.00           H
ATOM   2828  HG3 GLU A 182      66.549 -42.944  14.496  1.00  0.00           H
ATOM   2829  N   TYR A 183      67.688 -42.163  11.868  1.00  0.00           N
ATOM   2830  CA  TYR A 183      67.662 -40.884  11.167  1.00  0.00           C
ATOM   2831  C   TYR A 183      68.564 -40.876   9.946  1.00  0.00           C
ATOM   2832  O   TYR A 183      68.728 -39.845   9.295  1.00  0.00           O
ATOM   2833  CB  TYR A 183      67.980 -39.720  12.115  1.00  0.00           C
ATOM   2834  CG  TYR A 183      66.986 -39.654  13.241  1.00  0.00           C
ATOM   2835  CD1 TYR A 183      67.339 -40.022  14.537  1.00  0.00           C
ATOM   2836  CD2 TYR A 183      65.670 -39.277  12.999  1.00  0.00           C
ATOM   2837  CE1 TYR A 183      66.408 -39.991  15.566  1.00  0.00           C
ATOM   2838  CE2 TYR A 183      64.735 -39.243  14.015  1.00  0.00           C
ATOM   2839  CZ  TYR A 183      65.107 -39.603  15.296  1.00  0.00           C
ATOM   2840  OH  TYR A 183      64.164 -39.568  16.295  1.00  0.00           O
ATOM   2841  H   TYR A 183      68.189 -42.237  12.745  1.00  0.00           H
ATOM   2842  HA  TYR A 183      66.652 -40.728  10.788  1.00  0.00           H
ATOM   2843  HB2 TYR A 183      68.990 -39.841  12.512  1.00  0.00           H
ATOM   2844  HB3 TYR A 183      67.943 -38.780  11.564  1.00  0.00           H
ATOM   2845  HD1 TYR A 183      68.368 -40.269  14.752  1.00  0.00           H
ATOM   2846  HD2 TYR A 183      65.380 -39.003  11.995  1.00  0.00           H
ATOM   2847  HE1 TYR A 183      66.680 -40.107  16.576  1.00  0.00           H
ATOM   2848  HE2 TYR A 183      63.719 -38.959  13.812  1.00  0.00           H
ATOM   2849  HH  TYR A 183      63.282 -39.493  15.932  1.00  0.00           H
ATOM   2850  N   LEU A 184      69.135 -42.033   9.630  1.00  0.00           N
ATOM   2851  CA  LEU A 184      69.853 -42.200   8.373  1.00  0.00           C
ATOM   2852  C   LEU A 184      68.932 -42.782   7.306  1.00  0.00           C
ATOM   2853  O   LEU A 184      69.296 -42.849   6.133  1.00  0.00           O
ATOM   2854  CB  LEU A 184      71.074 -43.105   8.556  1.00  0.00           C
ATOM   2855  CG  LEU A 184      72.177 -42.577   9.471  1.00  0.00           C
ATOM   2856  CD1 LEU A 184      73.304 -43.590   9.576  1.00  0.00           C
ATOM   2857  CD2 LEU A 184      72.699 -41.249   8.960  1.00  0.00           C
ATOM   2858  H   LEU A 184      69.044 -42.825  10.259  1.00  0.00           H
ATOM   2859  HA  LEU A 184      70.184 -41.233   8.001  1.00  0.00           H
ATOM   2860  HB2 LEU A 184      71.519 -43.280   7.575  1.00  0.00           H
ATOM   2861  HB3 LEU A 184      70.736 -44.067   8.942  1.00  0.00           H
ATOM   2862  HG  LEU A 184      71.755 -42.440  10.465  1.00  0.00           H
ATOM   2863 HD21 LEU A 184      71.939 -40.475   9.044  1.00  0.00           H
ATOM   2864 HD22 LEU A 184      73.555 -40.942   9.562  1.00  0.00           H
ATOM   2865 HD23 LEU A 184      73.029 -41.340   7.926  1.00  0.00           H
ATOM   2866 HD11 LEU A 184      73.971 -43.283  10.379  1.00  0.00           H
ATOM   2867 HD12 LEU A 184      73.858 -43.623   8.643  1.00  0.00           H
ATOM   2868 HD13 LEU A 184      72.915 -44.576   9.828  1.00  0.00           H
ATOM   2869  N   GLU A 185      67.742 -43.210   7.716  1.00  0.00           N
ATOM   2870  CA  GLU A 185      66.816 -43.866   6.798  1.00  0.00           C
ATOM   2871  C   GLU A 185      66.075 -42.818   5.997  1.00  0.00           C
ATOM   2872  O   GLU A 185      65.608 -41.821   6.550  1.00  0.00           O
ATOM   2873  CB  GLU A 185      65.826 -44.750   7.555  1.00  0.00           C
ATOM   2874  CG  GLU A 185      66.466 -45.927   8.276  1.00  0.00           C
ATOM   2875  CD  GLU A 185      65.663 -46.383   9.494  1.00  0.00           C
ATOM   2876  OE1 GLU A 185      64.632 -45.744   9.812  1.00  0.00           O
ATOM   2877  OE2 GLU A 185      66.071 -47.378  10.137  1.00  0.00           O
ATOM   2878  H   GLU A 185      67.463 -43.089   8.687  1.00  0.00           H
ATOM   2879  HA  GLU A 185      67.378 -44.494   6.110  1.00  0.00           H
ATOM   2880  HB2 GLU A 185      65.088 -45.140   6.851  1.00  0.00           H
ATOM   2881  HB3 GLU A 185      65.301 -44.093   8.244  1.00  0.00           H
ATOM   2882  HG2 GLU A 185      67.469 -45.656   8.613  1.00  0.00           H
ATOM   2883  HG3 GLU A 185      66.577 -46.751   7.566  1.00  0.00           H
ATOM   2884  N   GLU A 186      65.957 -43.033   4.694  1.00  0.00           N
ATOM   2885  CA  GLU A 186      65.397 -41.988   3.858  1.00  0.00           C
ATOM   2886  C   GLU A 186      63.897 -41.787   4.083  1.00  0.00           C
ATOM   2887  O   GLU A 186      63.423 -40.656   4.084  1.00  0.00           O
ATOM   2888  CB  GLU A 186      65.794 -42.147   2.381  1.00  0.00           C
ATOM   2889  CG  GLU A 186      65.029 -43.157   1.568  1.00  0.00           C
ATOM   2890  CD  GLU A 186      65.542 -43.212   0.131  1.00  0.00           C
ATOM   2891  OE1 GLU A 186      66.771 -43.385  -0.054  1.00  0.00           O
ATOM   2892  OE2 GLU A 186      64.722 -43.071  -0.806  1.00  0.00           O
ATOM   2893  H   GLU A 186      66.520 -43.749   4.260  1.00  0.00           H
ATOM   2894  HA  GLU A 186      65.866 -41.053   4.175  1.00  0.00           H
ATOM   2895  HB2 GLU A 186      66.860 -42.376   2.342  1.00  0.00           H
ATOM   2896  HB3 GLU A 186      65.648 -41.191   1.889  1.00  0.00           H
ATOM   2897  HG2 GLU A 186      63.969 -42.886   1.566  1.00  0.00           H
ATOM   2898  HG3 GLU A 186      65.126 -44.141   2.033  1.00  0.00           H
ATOM   2899  N   LYS A 187      63.154 -42.861   4.325  1.00  0.00           N
ATOM   2900  CA  LYS A 187      61.745 -42.692   4.679  1.00  0.00           C
ATOM   2901  C   LYS A 187      61.556 -41.881   5.970  1.00  0.00           C
ATOM   2902  O   LYS A 187      60.691 -41.008   6.050  1.00  0.00           O
ATOM   2903  CB  LYS A 187      61.031 -44.036   4.819  1.00  0.00           C
ATOM   2904  CG  LYS A 187      59.553 -43.863   5.140  1.00  0.00           C
ATOM   2905  CD  LYS A 187      58.871 -45.163   5.515  1.00  0.00           C
ATOM   2906  CE  LYS A 187      57.389 -44.935   5.779  1.00  0.00           C
ATOM   2907  NZ  LYS A 187      56.689 -46.195   6.153  1.00  0.00           N
ATOM   2908  H   LYS A 187      63.606 -43.764   4.370  1.00  0.00           H
ATOM   2909  HA  LYS A 187      61.254 -42.116   3.894  1.00  0.00           H
ATOM   2910  HB2 LYS A 187      61.508 -44.608   5.618  1.00  0.00           H
ATOM   2911  HB3 LYS A 187      61.131 -44.596   3.888  1.00  0.00           H
ATOM   2912  HG2 LYS A 187      59.416 -43.198   5.990  1.00  0.00           H
ATOM   2913  HG3 LYS A 187      59.052 -43.423   4.276  1.00  0.00           H
ATOM   2914  HD2 LYS A 187      59.346 -45.562   6.414  1.00  0.00           H
ATOM   2915  HD3 LYS A 187      58.995 -45.877   4.699  1.00  0.00           H
ATOM   2916  HE2 LYS A 187      56.940 -44.494   4.884  1.00  0.00           H
ATOM   2917  HE3 LYS A 187      57.298 -44.187   6.578  1.00  0.00           H
ATOM   2918  HZ1 LYS A 187      55.715 -46.002   6.344  1.00  0.00           H
ATOM   2919  HZ2 LYS A 187      57.109 -46.571   6.995  1.00  0.00           H
ATOM   2920  HZ3 LYS A 187      56.767 -46.879   5.413  1.00  0.00           H
ATOM   2921  N   ARG A 188      62.358 -42.180   6.986  1.00  0.00           N
ATOM   2922  CA  ARG A 188      62.268 -41.452   8.244  1.00  0.00           C
ATOM   2923  C   ARG A 188      62.483 -39.963   8.001  1.00  0.00           C
ATOM   2924  O   ARG A 188      61.722 -39.129   8.487  1.00  0.00           O
ATOM   2925  CB  ARG A 188      63.300 -41.972   9.247  1.00  0.00           C
ATOM   2926  CG  ARG A 188      63.152 -41.388  10.644  1.00  0.00           C
ATOM   2927  CD  ARG A 188      61.926 -41.950  11.358  1.00  0.00           C
ATOM   2928  NE  ARG A 188      61.993 -41.722  12.801  1.00  0.00           N
ATOM   2929  CZ  ARG A 188      61.261 -40.828  13.456  1.00  0.00           C
ATOM   2930  NH1 ARG A 188      60.381 -40.074  12.807  1.00  0.00           N
ATOM   2931  NH2 ARG A 188      61.403 -40.697  14.766  1.00  0.00           N
ATOM   2932  H   ARG A 188      63.112 -42.840   6.856  1.00  0.00           H
ATOM   2933  HA  ARG A 188      61.264 -41.569   8.650  1.00  0.00           H
ATOM   2934  HB2 ARG A 188      64.304 -41.739   8.888  1.00  0.00           H
ATOM   2935  HB3 ARG A 188      63.231 -43.060   9.313  1.00  0.00           H
ATOM   2936  HG2 ARG A 188      63.109 -40.299  10.617  1.00  0.00           H
ATOM   2937  HG3 ARG A 188      64.039 -41.674  11.212  1.00  0.00           H
ATOM   2938  HD2 ARG A 188      61.917 -43.032  11.208  1.00  0.00           H
ATOM   2939  HD3 ARG A 188      61.017 -41.551  10.910  1.00  0.00           H
ATOM   2940  HE  ARG A 188      62.639 -42.280  13.369  1.00  0.00           H
ATOM   2941 HH11 ARG A 188      59.901 -39.390  13.392  1.00  0.00           H
ATOM   2942 HH12 ARG A 188      60.364 -40.064  11.810  1.00  0.00           H
ATOM   2943 HH21 ARG A 188      60.783 -40.047  15.253  1.00  0.00           H
ATOM   2944 HH22 ARG A 188      62.011 -41.376  15.240  1.00  0.00           H
ATOM   2945  N   ILE A 189      63.522 -39.640   7.236  1.00  0.00           N
ATOM   2946  CA  ILE A 189      63.846 -38.253   6.920  1.00  0.00           C
ATOM   2947  C   ILE A 189      62.744 -37.551   6.127  1.00  0.00           C
ATOM   2948  O   ILE A 189      62.293 -36.461   6.494  1.00  0.00           O
ATOM   2949  CB  ILE A 189      65.157 -38.163   6.145  1.00  0.00           C
ATOM   2950  CG1 ILE A 189      66.333 -38.466   7.079  1.00  0.00           C
ATOM   2951  CG2 ILE A 189      65.305 -36.786   5.539  1.00  0.00           C
ATOM   2952  CD1 ILE A 189      67.566 -39.021   6.370  1.00  0.00           C
ATOM   2953  H   ILE A 189      64.173 -40.371   6.961  1.00  0.00           H
ATOM   2954  HA  ILE A 189      63.965 -37.698   7.852  1.00  0.00           H
ATOM   2955  HB  ILE A 189      65.146 -38.898   5.338  1.00  0.00           H
ATOM   2956 HG12 ILE A 189      66.045 -39.210   7.823  1.00  0.00           H
ATOM   2957 HG13 ILE A 189      66.612 -37.561   7.623  1.00  0.00           H
ATOM   2958 HD11 ILE A 189      68.416 -39.055   7.043  1.00  0.00           H
ATOM   2959 HD12 ILE A 189      67.823 -38.361   5.544  1.00  0.00           H
ATOM   2960 HD13 ILE A 189      67.370 -40.018   5.979  1.00  0.00           H
ATOM   2961 HG21 ILE A 189      66.322 -36.660   5.172  1.00  0.00           H
ATOM   2962 HG22 ILE A 189      64.643 -36.644   4.685  1.00  0.00           H
ATOM   2963 HG23 ILE A 189      65.126 -36.013   6.288  1.00  0.00           H
ATOM   2964  N   LYS A 190      62.302 -38.184   5.047  1.00  0.00           N
ATOM   2965  CA  LYS A 190      61.281 -37.593   4.195  1.00  0.00           C
ATOM   2966  C   LYS A 190      60.017 -37.262   4.977  1.00  0.00           C
ATOM   2967  O   LYS A 190      59.407 -36.215   4.768  1.00  0.00           O
ATOM   2968  CB  LYS A 190      60.921 -38.533   3.043  1.00  0.00           C
ATOM   2969  CG  LYS A 190      61.989 -38.718   2.002  1.00  0.00           C
ATOM   2970  CD  LYS A 190      61.386 -39.433   0.803  1.00  0.00           C
ATOM   2971  CE  LYS A 190      62.428 -40.186   0.005  1.00  0.00           C
ATOM   2972  NZ  LYS A 190      61.785 -41.036  -1.039  1.00  0.00           N
ATOM   2973  H   LYS A 190      62.727 -39.072   4.791  1.00  0.00           H
ATOM   2974  HA  LYS A 190      61.651 -36.649   3.793  1.00  0.00           H
ATOM   2975  HB2 LYS A 190      60.039 -38.118   2.550  1.00  0.00           H
ATOM   2976  HB3 LYS A 190      60.646 -39.508   3.453  1.00  0.00           H
ATOM   2977  HG2 LYS A 190      62.840 -39.262   2.378  1.00  0.00           H
ATOM   2978  HG3 LYS A 190      62.347 -37.740   1.675  1.00  0.00           H
ATOM   2979  HD2 LYS A 190      60.654 -40.160   1.160  1.00  0.00           H
ATOM   2980  HD3 LYS A 190      60.876 -38.706   0.168  1.00  0.00           H
ATOM   2981  HE2 LYS A 190      63.007 -40.819   0.688  1.00  0.00           H
ATOM   2982  HE3 LYS A 190      63.128 -39.476  -0.449  1.00  0.00           H
ATOM   2983  HZ1 LYS A 190      62.526 -41.606  -1.455  1.00  0.00           H
ATOM   2984  HZ2 LYS A 190      61.364 -40.474  -1.763  1.00  0.00           H
ATOM   2985  HZ3 LYS A 190      61.121 -41.673  -0.627  1.00  0.00           H
ATOM   2986  N   ASP A 191      59.609 -38.167   5.861  1.00  0.00           N
ATOM   2987  CA  ASP A 191      58.387 -37.954   6.631  1.00  0.00           C
ATOM   2988  C   ASP A 191      58.550 -36.775   7.586  1.00  0.00           C
ATOM   2989  O   ASP A 191      57.637 -35.967   7.737  1.00  0.00           O
ATOM   2990  CB  ASP A 191      57.970 -39.223   7.378  1.00  0.00           C
ATOM   2991  CG  ASP A 191      57.455 -40.313   6.438  1.00  0.00           C
ATOM   2992  OD1 ASP A 191      57.098 -39.990   5.284  1.00  0.00           O
ATOM   2993  OD2 ASP A 191      57.404 -41.492   6.851  1.00  0.00           O
ATOM   2994  H   ASP A 191      60.117 -39.040   5.960  1.00  0.00           H
ATOM   2995  HA  ASP A 191      57.590 -37.686   5.941  1.00  0.00           H
ATOM   2996  HB2 ASP A 191      58.815 -39.601   7.957  1.00  0.00           H
ATOM   2997  HB3 ASP A 191      57.166 -38.972   8.072  1.00  0.00           H
ATOM   2998  N   LEU A 192      59.719 -36.668   8.212  1.00  0.00           N
ATOM   2999  CA  LEU A 192      60.007 -35.538   9.099  1.00  0.00           C
ATOM   3000  C   LEU A 192      60.026 -34.216   8.337  1.00  0.00           C
ATOM   3001  O   LEU A 192      59.428 -33.229   8.771  1.00  0.00           O
ATOM   3002  CB  LEU A 192      61.342 -35.735   9.826  1.00  0.00           C
ATOM   3003  CG  LEU A 192      61.317 -36.666  11.044  1.00  0.00           C
ATOM   3004  CD1 LEU A 192      62.709 -36.794  11.668  1.00  0.00           C
ATOM   3005  CD2 LEU A 192      60.316 -36.153  12.070  1.00  0.00           C
ATOM   3006  H   LEU A 192      60.444 -37.358   8.041  1.00  0.00           H
ATOM   3007  HA  LEU A 192      59.195 -35.438   9.813  1.00  0.00           H
ATOM   3008  HB2 LEU A 192      61.669 -34.760  10.189  1.00  0.00           H
ATOM   3009  HB3 LEU A 192      62.086 -36.101   9.118  1.00  0.00           H
ATOM   3010  HG  LEU A 192      60.998 -37.658  10.724  1.00  0.00           H
ATOM   3011 HD21 LEU A 192      60.369 -36.784  12.953  1.00  0.00           H
ATOM   3012 HD22 LEU A 192      59.297 -36.221  11.701  1.00  0.00           H
ATOM   3013 HD23 LEU A 192      60.560 -35.129  12.353  1.00  0.00           H
ATOM   3014 HD11 LEU A 192      63.424 -37.117  10.911  1.00  0.00           H
ATOM   3015 HD12 LEU A 192      62.683 -37.547  12.448  1.00  0.00           H
ATOM   3016 HD13 LEU A 192      63.030 -35.841  12.091  1.00  0.00           H
ATOM   3017  N   VAL A 193      60.714 -34.200   7.198  1.00  0.00           N
ATOM   3018  CA  VAL A 193      60.831 -32.981   6.413  1.00  0.00           C
ATOM   3019  C   VAL A 193      59.473 -32.537   5.906  1.00  0.00           C
ATOM   3020  O   VAL A 193      59.157 -31.352   5.907  1.00  0.00           O
ATOM   3021  CB  VAL A 193      61.781 -33.158   5.227  1.00  0.00           C
ATOM   3022  CG1 VAL A 193      61.723 -31.934   4.322  1.00  0.00           C
ATOM   3023  CG2 VAL A 193      63.189 -33.379   5.726  1.00  0.00           C
ATOM   3024  H   VAL A 193      61.244 -35.024   6.927  1.00  0.00           H
ATOM   3025  HA  VAL A 193      61.218 -32.180   7.046  1.00  0.00           H
ATOM   3026  HB  VAL A 193      61.477 -34.031   4.647  1.00  0.00           H
ATOM   3027 HG11 VAL A 193      60.769 -31.860   3.800  1.00  0.00           H
ATOM   3028 HG12 VAL A 193      62.499 -32.014   3.561  1.00  0.00           H
ATOM   3029 HG13 VAL A 193      61.901 -31.025   4.899  1.00  0.00           H
ATOM   3030 HG21 VAL A 193      63.849 -33.576   4.882  1.00  0.00           H
ATOM   3031 HG22 VAL A 193      63.248 -34.218   6.412  1.00  0.00           H
ATOM   3032 HG23 VAL A 193      63.542 -32.489   6.247  1.00  0.00           H
ATOM   3033  N   LYS A 194      58.665 -33.500   5.481  1.00  0.00           N
ATOM   3034  CA  LYS A 194      57.340 -33.204   4.960  1.00  0.00           C
ATOM   3035  C   LYS A 194      56.487 -32.553   6.044  1.00  0.00           C
ATOM   3036  O   LYS A 194      55.687 -31.655   5.784  1.00  0.00           O
ATOM   3037  CB  LYS A 194      56.671 -34.491   4.465  1.00  0.00           C
ATOM   3038  CG  LYS A 194      55.162 -34.381   4.269  1.00  0.00           C
ATOM   3039  CD  LYS A 194      54.522 -35.761   4.133  1.00  0.00           C
ATOM   3040  CE  LYS A 194      54.795 -36.632   5.360  1.00  0.00           C
ATOM   3041  NZ  LYS A 194      54.278 -38.021   5.186  1.00  0.00           N
ATOM   3042  H   LYS A 194      59.020 -34.452   5.443  1.00  0.00           H
ATOM   3043  HA  LYS A 194      57.407 -32.489   4.137  1.00  0.00           H
ATOM   3044  HB2 LYS A 194      56.910 -35.242   5.210  1.00  0.00           H
ATOM   3045  HB3 LYS A 194      57.137 -34.797   3.527  1.00  0.00           H
ATOM   3046  HG2 LYS A 194      54.670 -33.916   5.121  1.00  0.00           H
ATOM   3047  HG3 LYS A 194      54.953 -33.786   3.379  1.00  0.00           H
ATOM   3048  HD2 LYS A 194      54.931 -36.244   3.243  1.00  0.00           H
ATOM   3049  HD3 LYS A 194      53.446 -35.635   4.001  1.00  0.00           H
ATOM   3050  HE2 LYS A 194      54.319 -36.155   6.222  1.00  0.00           H
ATOM   3051  HE3 LYS A 194      55.864 -36.691   5.570  1.00  0.00           H
ATOM   3052  HZ1 LYS A 194      53.430 -38.036   4.641  1.00  0.00           H
ATOM   3053  HZ2 LYS A 194      54.995 -38.591   4.736  1.00  0.00           H
ATOM   3054  HZ3 LYS A 194      54.123 -38.449   6.089  1.00  0.00           H
ATOM   3055  N   LYS A 195      56.677 -33.017   7.268  1.00  0.00           N
ATOM   3056  CA  LYS A 195      55.914 -32.536   8.403  1.00  0.00           C
ATOM   3057  C   LYS A 195      56.187 -31.046   8.698  1.00  0.00           C
ATOM   3058  O   LYS A 195      55.289 -30.312   9.108  1.00  0.00           O
ATOM   3059  CB  LYS A 195      56.248 -33.413   9.613  1.00  0.00           C
ATOM   3060  CG  LYS A 195      55.284 -33.345  10.773  1.00  0.00           C
ATOM   3061  CD  LYS A 195      55.795 -34.225  11.910  1.00  0.00           C
ATOM   3062  CE  LYS A 195      55.087 -33.938  13.225  1.00  0.00           C
ATOM   3063  NZ  LYS A 195      55.893 -34.435  14.378  1.00  0.00           N
ATOM   3064  H   LYS A 195      57.378 -33.735   7.411  1.00  0.00           H
ATOM   3065  HA  LYS A 195      54.850 -32.611   8.178  1.00  0.00           H
ATOM   3066  HB2 LYS A 195      57.241 -33.142   9.969  1.00  0.00           H
ATOM   3067  HB3 LYS A 195      56.281 -34.453   9.288  1.00  0.00           H
ATOM   3068  HG2 LYS A 195      54.293 -33.677  10.460  1.00  0.00           H
ATOM   3069  HG3 LYS A 195      55.223 -32.312  11.119  1.00  0.00           H
ATOM   3070  HD2 LYS A 195      56.861 -34.031  12.040  1.00  0.00           H
ATOM   3071  HD3 LYS A 195      55.674 -35.277  11.643  1.00  0.00           H
ATOM   3072  HE2 LYS A 195      54.948 -32.855  13.312  1.00  0.00           H
ATOM   3073  HE3 LYS A 195      54.098 -34.406  13.207  1.00  0.00           H
ATOM   3074  HZ1 LYS A 195      55.424 -34.285  15.261  1.00  0.00           H
ATOM   3075  HZ2 LYS A 195      56.803 -33.999  14.423  1.00  0.00           H
ATOM   3076  HZ3 LYS A 195      56.086 -35.433  14.312  1.00  0.00           H
ATOM   3077  N   HIS A 196      57.414 -30.589   8.465  1.00  0.00           N
ATOM   3078  CA  HIS A 196      57.787 -29.243   8.899  1.00  0.00           C
ATOM   3079  C   HIS A 196      58.197 -28.270   7.787  1.00  0.00           C
ATOM   3080  O   HIS A 196      58.694 -27.181   8.074  1.00  0.00           O
ATOM   3081  CB  HIS A 196      58.915 -29.321   9.938  1.00  0.00           C
ATOM   3082  CG  HIS A 196      58.607 -30.216  11.099  1.00  0.00           C
ATOM   3083  ND1 HIS A 196      57.699 -29.878  12.078  1.00  0.00           N
ATOM   3084  CD2 HIS A 196      59.089 -31.435  11.439  1.00  0.00           C
ATOM   3085  CE1 HIS A 196      57.631 -30.852  12.968  1.00  0.00           C
ATOM   3086  NE2 HIS A 196      58.465 -31.809  12.603  1.00  0.00           N
ATOM   3087  H   HIS A 196      58.135 -31.227   8.159  1.00  0.00           H
ATOM   3088  HA  HIS A 196      56.952 -28.750   9.401  1.00  0.00           H
ATOM   3089  HB2 HIS A 196      59.824 -29.680   9.453  1.00  0.00           H
ATOM   3090  HB3 HIS A 196      59.117 -28.323  10.331  1.00  0.00           H
ATOM   3091  HD2 HIS A 196      59.852 -31.976  10.894  1.00  0.00           H
ATOM   3092  HE1 HIS A 196      57.039 -30.816  13.871  1.00  0.00           H
ATOM   3093  HE2 HIS A 196      58.747 -32.599  13.162  1.00  0.00           H
ATOM   3094  N   SER A 197      57.988 -28.641   6.528  1.00  0.00           N
ATOM   3095  CA  SER A 197      58.593 -27.874   5.441  1.00  0.00           C
ATOM   3096  C   SER A 197      57.613 -27.091   4.580  1.00  0.00           C
ATOM   3097  O   SER A 197      58.015 -26.483   3.585  1.00  0.00           O
ATOM   3098  CB  SER A 197      59.434 -28.789   4.542  1.00  0.00           C
ATOM   3099  OG  SER A 197      58.603 -29.609   3.731  1.00  0.00           O
ATOM   3100  H   SER A 197      57.631 -29.564   6.339  1.00  0.00           H
ATOM   3101  HA  SER A 197      59.287 -27.135   5.842  1.00  0.00           H
ATOM   3102  HB2 SER A 197      60.019 -28.152   3.878  1.00  0.00           H
ATOM   3103  HB3 SER A 197      60.141 -29.367   5.133  1.00  0.00           H
ATOM   3104  HG  SER A 197      58.408 -30.371   4.286  1.00  0.00           H
ATOM   3105  N   GLU A 198      56.334 -27.097   4.936  1.00  0.00           N
ATOM   3106  CA  GLU A 198      55.344 -26.481   4.054  1.00  0.00           C
ATOM   3107  C   GLU A 198      55.675 -25.025   3.721  1.00  0.00           C
ATOM   3108  O   GLU A 198      55.460 -24.575   2.597  1.00  0.00           O
ATOM   3109  CB  GLU A 198      53.928 -26.566   4.630  1.00  0.00           C
ATOM   3110  CG  GLU A 198      52.901 -25.883   3.732  1.00  0.00           C
ATOM   3111  CD  GLU A 198      51.480 -25.950   4.267  1.00  0.00           C
ATOM   3112  OE1 GLU A 198      51.296 -26.309   5.452  1.00  0.00           O
ATOM   3113  OE2 GLU A 198      50.544 -25.633   3.494  1.00  0.00           O
ATOM   3114  H   GLU A 198      56.037 -27.604   5.753  1.00  0.00           H
ATOM   3115  HA  GLU A 198      55.350 -27.015   3.103  1.00  0.00           H
ATOM   3116  HB2 GLU A 198      53.662 -27.618   4.749  1.00  0.00           H
ATOM   3117  HB3 GLU A 198      53.923 -26.089   5.612  1.00  0.00           H
ATOM   3118  HG2 GLU A 198      52.938 -26.348   2.744  1.00  0.00           H
ATOM   3119  HG3 GLU A 198      53.140 -24.825   3.627  1.00  0.00           H
ATOM   3120  N   PHE A 199      56.194 -24.288   4.695  1.00  0.00           N
ATOM   3121  CA  PHE A 199      56.408 -22.857   4.499  1.00  0.00           C
ATOM   3122  C   PHE A 199      57.869 -22.471   4.370  1.00  0.00           C
ATOM   3123  O   PHE A 199      58.223 -21.307   4.546  1.00  0.00           O
ATOM   3124  CB  PHE A 199      55.679 -22.040   5.573  1.00  0.00           C
ATOM   3125  CG  PHE A 199      54.187 -22.131   5.456  1.00  0.00           C
ATOM   3126  CD1 PHE A 199      53.452 -22.915   6.334  1.00  0.00           C
ATOM   3127  CD2 PHE A 199      53.524 -21.487   4.416  1.00  0.00           C
ATOM   3128  CE1 PHE A 199      52.075 -23.024   6.204  1.00  0.00           C
ATOM   3129  CE2 PHE A 199      52.144 -21.593   4.276  1.00  0.00           C
ATOM   3130  CZ  PHE A 199      51.419 -22.362   5.170  1.00  0.00           C
ATOM   3131  H   PHE A 199      56.346 -24.697   5.603  1.00  0.00           H
ATOM   3132  HA  PHE A 199      55.973 -22.549   3.549  1.00  0.00           H
ATOM   3133  HB2 PHE A 199      56.001 -22.372   6.561  1.00  0.00           H
ATOM   3134  HB3 PHE A 199      55.943 -20.986   5.479  1.00  0.00           H
ATOM   3135  HD1 PHE A 199      53.954 -23.462   7.118  1.00  0.00           H
ATOM   3136  HD2 PHE A 199      54.089 -20.905   3.703  1.00  0.00           H
ATOM   3137  HE1 PHE A 199      51.520 -23.681   6.859  1.00  0.00           H
ATOM   3138  HE2 PHE A 199      51.644 -21.111   3.450  1.00  0.00           H
ATOM   3139  HZ  PHE A 199      50.356 -22.501   5.034  1.00  0.00           H
ATOM   3140  N   ILE A 200      58.705 -23.452   4.036  1.00  0.00           N
ATOM   3141  CA  ILE A 200      60.096 -23.186   3.689  1.00  0.00           C
ATOM   3142  C   ILE A 200      60.204 -22.923   2.190  1.00  0.00           C
ATOM   3143  O   ILE A 200      60.055 -23.831   1.373  1.00  0.00           O
ATOM   3144  CB  ILE A 200      61.012 -24.349   4.092  1.00  0.00           C
ATOM   3145  CG1 ILE A 200      60.992 -24.516   5.614  1.00  0.00           C
ATOM   3146  CG2 ILE A 200      62.433 -24.112   3.600  1.00  0.00           C
ATOM   3147  CD1 ILE A 200      61.937 -25.569   6.116  1.00  0.00           C
ATOM   3148  H   ILE A 200      58.326 -24.371   3.830  1.00  0.00           H
ATOM   3149  HA  ILE A 200      60.446 -22.300   4.224  1.00  0.00           H
ATOM   3150  HB  ILE A 200      60.642 -25.269   3.635  1.00  0.00           H
ATOM   3151 HG12 ILE A 200      61.248 -23.568   6.091  1.00  0.00           H
ATOM   3152 HG13 ILE A 200      59.986 -24.792   5.931  1.00  0.00           H
ATOM   3153 HD11 ILE A 200      61.731 -25.751   7.172  1.00  0.00           H
ATOM   3154 HD12 ILE A 200      61.806 -26.496   5.558  1.00  0.00           H
ATOM   3155 HD13 ILE A 200      62.956 -25.199   6.014  1.00  0.00           H
ATOM   3156 HG21 ILE A 200      62.473 -24.012   2.518  1.00  0.00           H
ATOM   3157 HG22 ILE A 200      63.073 -24.960   3.835  1.00  0.00           H
ATOM   3158 HG23 ILE A 200      62.847 -23.215   4.065  1.00  0.00           H
ATOM   3159  N   SER A 201      60.458 -21.669   1.835  1.00  0.00           N
ATOM   3160  CA  SER A 201      60.405 -21.246   0.446  1.00  0.00           C
ATOM   3161  C   SER A 201      61.778 -21.313  -0.221  1.00  0.00           C
ATOM   3162  O   SER A 201      62.182 -20.395  -0.931  1.00  0.00           O
ATOM   3163  CB  SER A 201      59.801 -19.843   0.342  1.00  0.00           C
ATOM   3164  OG  SER A 201      60.410 -18.957   1.264  1.00  0.00           O
ATOM   3165  H   SER A 201      60.640 -20.991   2.561  1.00  0.00           H
ATOM   3166  HA  SER A 201      59.754 -21.919  -0.113  1.00  0.00           H
ATOM   3167  HB2 SER A 201      58.736 -19.903   0.572  1.00  0.00           H
ATOM   3168  HB3 SER A 201      59.906 -19.459  -0.673  1.00  0.00           H
ATOM   3169  HG  SER A 201      60.036 -19.114   2.142  1.00  0.00           H
ATOM   3170  N   PHE A 202      62.492 -22.405   0.042  1.00  0.00           N
ATOM   3171  CA  PHE A 202      63.737 -22.728  -0.642  1.00  0.00           C
ATOM   3172  C   PHE A 202      63.662 -24.210  -0.980  1.00  0.00           C
ATOM   3173  O   PHE A 202      62.966 -24.956  -0.295  1.00  0.00           O
ATOM   3174  CB  PHE A 202      64.952 -22.437   0.249  1.00  0.00           C
ATOM   3175  CG  PHE A 202      65.029 -21.011   0.730  1.00  0.00           C
ATOM   3176  CD1 PHE A 202      64.547 -20.662   1.984  1.00  0.00           C
ATOM   3177  CD2 PHE A 202      65.577 -20.019  -0.074  1.00  0.00           C
ATOM   3178  CE1 PHE A 202      64.607 -19.348   2.428  1.00  0.00           C
ATOM   3179  CE2 PHE A 202      65.646 -18.703   0.363  1.00  0.00           C
ATOM   3180  CZ  PHE A 202      65.159 -18.366   1.618  1.00  0.00           C
ATOM   3181  H   PHE A 202      62.058 -23.143   0.587  1.00  0.00           H
ATOM   3182  HA  PHE A 202      63.804 -22.126  -1.543  1.00  0.00           H
ATOM   3183  HB2 PHE A 202      64.922 -23.099   1.117  1.00  0.00           H
ATOM   3184  HB3 PHE A 202      65.865 -22.668  -0.301  1.00  0.00           H
ATOM   3185  HD1 PHE A 202      64.138 -21.417   2.642  1.00  0.00           H
ATOM   3186  HD2 PHE A 202      65.927 -20.273  -1.059  1.00  0.00           H
ATOM   3187  HE1 PHE A 202      64.266 -19.093   3.428  1.00  0.00           H
ATOM   3188  HE2 PHE A 202      66.120 -17.951  -0.250  1.00  0.00           H
ATOM   3189  HZ  PHE A 202      65.251 -17.358   1.993  1.00  0.00           H
ATOM   3190  N   PRO A 203      64.356 -24.638  -2.048  1.00  0.00           N
ATOM   3191  CA  PRO A 203      64.352 -26.045  -2.471  1.00  0.00           C
ATOM   3192  C   PRO A 203      65.076 -26.951  -1.481  1.00  0.00           C
ATOM   3193  O   PRO A 203      66.204 -26.652  -1.086  1.00  0.00           O
ATOM   3194  CB  PRO A 203      65.144 -26.024  -3.792  1.00  0.00           C
ATOM   3195  CG  PRO A 203      65.248 -24.592  -4.183  1.00  0.00           C
ATOM   3196  CD  PRO A 203      65.199 -23.804  -2.918  1.00  0.00           C
ATOM   3197  HA  PRO A 203      63.328 -26.381  -2.638  1.00  0.00           H
ATOM   3198  HB2 PRO A 203      66.152 -26.417  -3.651  1.00  0.00           H
ATOM   3199  HB3 PRO A 203      64.634 -26.603  -4.562  1.00  0.00           H
ATOM   3200  HG2 PRO A 203      64.386 -24.326  -4.797  1.00  0.00           H
ATOM   3201  HG3 PRO A 203      66.167 -24.393  -4.735  1.00  0.00           H
ATOM   3202  HD2 PRO A 203      66.189 -23.726  -2.474  1.00  0.00           H
ATOM   3203  HD3 PRO A 203      64.785 -22.819  -3.126  1.00  0.00           H
ATOM   3204  N   ILE A 204      64.445 -28.063  -1.113  1.00  0.00           N
ATOM   3205  CA  ILE A 204      65.053 -29.034  -0.213  1.00  0.00           C
ATOM   3206  C   ILE A 204      65.316 -30.344  -0.943  1.00  0.00           C
ATOM   3207  O   ILE A 204      64.412 -30.905  -1.560  1.00  0.00           O
ATOM   3208  CB  ILE A 204      64.149 -29.331   0.998  1.00  0.00           C
ATOM   3209  CG1 ILE A 204      63.772 -28.041   1.718  1.00  0.00           C
ATOM   3210  CG2 ILE A 204      64.845 -30.299   1.952  1.00  0.00           C
ATOM   3211  CD1 ILE A 204      62.673 -28.222   2.754  1.00  0.00           C
ATOM   3212  H   ILE A 204      63.494 -28.215  -1.411  1.00  0.00           H
ATOM   3213  HA  ILE A 204      65.991 -28.645   0.175  1.00  0.00           H
ATOM   3214  HB  ILE A 204      63.230 -29.799   0.638  1.00  0.00           H
ATOM   3215 HG12 ILE A 204      64.649 -27.615   2.203  1.00  0.00           H
ATOM   3216 HG13 ILE A 204      63.392 -27.306   1.011  1.00  0.00           H
ATOM   3217 HD11 ILE A 204      62.359 -27.243   3.114  1.00  0.00           H
ATOM   3218 HD12 ILE A 204      63.031 -28.798   3.607  1.00  0.00           H
ATOM   3219 HD13 ILE A 204      61.814 -28.721   2.305  1.00  0.00           H
ATOM   3220 HG21 ILE A 204      64.228 -30.486   2.828  1.00  0.00           H
ATOM   3221 HG22 ILE A 204      65.026 -31.262   1.477  1.00  0.00           H
ATOM   3222 HG23 ILE A 204      65.796 -29.877   2.285  1.00  0.00           H
ATOM   3223  N   LYS A 205      66.549 -30.835  -0.867  1.00  0.00           N
ATOM   3224  CA  LYS A 205      66.907 -32.071  -1.557  1.00  0.00           C
ATOM   3225  C   LYS A 205      67.545 -33.100  -0.632  1.00  0.00           C
ATOM   3226  O   LYS A 205      68.307 -32.762   0.276  1.00  0.00           O
ATOM   3227  CB  LYS A 205      67.844 -31.782  -2.732  1.00  0.00           C
ATOM   3228  CG  LYS A 205      67.217 -30.955  -3.843  1.00  0.00           C
ATOM   3229  CD  LYS A 205      68.238 -30.672  -4.933  1.00  0.00           C
ATOM   3230  CE  LYS A 205      67.706 -29.691  -5.966  1.00  0.00           C
ATOM   3231  NZ  LYS A 205      68.766 -29.274  -6.930  1.00  0.00           N
ATOM   3232  H   LYS A 205      67.249 -30.330  -0.323  1.00  0.00           H
ATOM   3233  HA  LYS A 205      66.009 -32.541  -1.959  1.00  0.00           H
ATOM   3234  HB2 LYS A 205      68.724 -31.262  -2.347  1.00  0.00           H
ATOM   3235  HB3 LYS A 205      68.175 -32.732  -3.157  1.00  0.00           H
ATOM   3236  HG2 LYS A 205      66.870 -30.005  -3.435  1.00  0.00           H
ATOM   3237  HG3 LYS A 205      66.366 -31.491  -4.266  1.00  0.00           H
ATOM   3238  HD2 LYS A 205      68.515 -31.609  -5.419  1.00  0.00           H
ATOM   3239  HD3 LYS A 205      69.128 -30.242  -4.467  1.00  0.00           H
ATOM   3240  HE2 LYS A 205      66.867 -30.155  -6.493  1.00  0.00           H
ATOM   3241  HE3 LYS A 205      67.323 -28.811  -5.437  1.00  0.00           H
ATOM   3242  HZ1 LYS A 205      68.395 -28.613  -7.603  1.00  0.00           H
ATOM   3243  HZ2 LYS A 205      69.521 -28.807  -6.441  1.00  0.00           H
ATOM   3244  HZ3 LYS A 205      69.145 -30.070  -7.425  1.00  0.00           H
ATOM   3245  N   LEU A 206      67.234 -34.363  -0.888  1.00  0.00           N
ATOM   3246  CA  LEU A 206      67.764 -35.472  -0.117  1.00  0.00           C
ATOM   3247  C   LEU A 206      68.672 -36.346  -0.981  1.00  0.00           C
ATOM   3248  O   LEU A 206      68.304 -36.730  -2.090  1.00  0.00           O
ATOM   3249  CB  LEU A 206      66.605 -36.301   0.429  1.00  0.00           C
ATOM   3250  CG  LEU A 206      66.926 -37.588   1.183  1.00  0.00           C
ATOM   3251  CD1 LEU A 206      67.740 -37.288   2.432  1.00  0.00           C
ATOM   3252  CD2 LEU A 206      65.633 -38.303   1.530  1.00  0.00           C
ATOM   3253  H   LEU A 206      66.668 -34.580  -1.690  1.00  0.00           H
ATOM   3254  HA  LEU A 206      68.349 -35.106   0.729  1.00  0.00           H
ATOM   3255  HB2 LEU A 206      66.015 -35.658   1.084  1.00  0.00           H
ATOM   3256  HB3 LEU A 206      65.971 -36.574  -0.416  1.00  0.00           H
ATOM   3257  HG  LEU A 206      67.512 -38.250   0.550  1.00  0.00           H
ATOM   3258 HD21 LEU A 206      65.859 -39.111   2.219  1.00  0.00           H
ATOM   3259 HD22 LEU A 206      64.951 -37.614   2.027  1.00  0.00           H
ATOM   3260 HD23 LEU A 206      65.183 -38.702   0.623  1.00  0.00           H
ATOM   3261 HD11 LEU A 206      67.876 -38.201   3.012  1.00  0.00           H
ATOM   3262 HD12 LEU A 206      68.729 -36.938   2.152  1.00  0.00           H
ATOM   3263 HD13 LEU A 206      67.245 -36.535   3.042  1.00  0.00           H
ATOM   3264  N   TYR A 207      69.859 -36.650  -0.466  1.00  0.00           N
ATOM   3265  CA  TYR A 207      70.797 -37.542  -1.140  1.00  0.00           C
ATOM   3266  C   TYR A 207      70.395 -38.999  -0.927  1.00  0.00           C
ATOM   3267  O   TYR A 207      70.355 -39.482   0.208  1.00  0.00           O
ATOM   3268  CB  TYR A 207      72.223 -37.306  -0.632  1.00  0.00           C
ATOM   3269  CG  TYR A 207      73.296 -38.063  -1.397  1.00  0.00           C
ATOM   3270  CD1 TYR A 207      73.700 -37.651  -2.661  1.00  0.00           C
ATOM   3271  CD2 TYR A 207      73.916 -39.179  -0.845  1.00  0.00           C
ATOM   3272  CE1 TYR A 207      74.682 -38.334  -3.358  1.00  0.00           C
ATOM   3273  CE2 TYR A 207      74.897 -39.867  -1.534  1.00  0.00           C
ATOM   3274  CZ  TYR A 207      75.277 -39.440  -2.789  1.00  0.00           C
ATOM   3275  OH  TYR A 207      76.255 -40.125  -3.477  1.00  0.00           O
ATOM   3276  H   TYR A 207      70.110 -36.308   0.458  1.00  0.00           H
ATOM   3277  HA  TYR A 207      70.785 -37.328  -2.209  1.00  0.00           H
ATOM   3278  HB2 TYR A 207      72.448 -36.241  -0.700  1.00  0.00           H
ATOM   3279  HB3 TYR A 207      72.274 -37.580   0.422  1.00  0.00           H
ATOM   3280  HD1 TYR A 207      73.249 -36.776  -3.103  1.00  0.00           H
ATOM   3281  HD2 TYR A 207      73.623 -39.532   0.137  1.00  0.00           H
ATOM   3282  HE1 TYR A 207      75.001 -38.012  -4.336  1.00  0.00           H
ATOM   3283  HE2 TYR A 207      75.347 -40.751  -1.098  1.00  0.00           H
ATOM   3284  HH  TYR A 207      76.478 -40.927  -2.990  1.00  0.00           H
ATOM   3285  N   CYS A 208      70.101 -39.691  -2.025  1.00  0.00           N
ATOM   3286  CA  CYS A 208      69.609 -41.066  -1.976  1.00  0.00           C
ATOM   3287  C   CYS A 208      70.489 -42.032  -2.763  1.00  0.00           C
ATOM   3288  O   CYS A 208      71.436 -41.625  -3.439  1.00  0.00           O
ATOM   3289  CB  CYS A 208      68.181 -41.140  -2.523  1.00  0.00           C
ATOM   3290  SG  CYS A 208      66.967 -40.122  -1.659  1.00  0.00           S
ATOM   3291  H   CYS A 208      70.279 -39.282  -2.926  1.00  0.00           H
ATOM   3292  HA  CYS A 208      69.595 -41.424  -0.944  1.00  0.00           H
ATOM   3293  HB2 CYS A 208      68.201 -40.840  -3.571  1.00  0.00           H
ATOM   3294  HB3 CYS A 208      67.828 -42.172  -2.473  1.00  0.00           H
ATOM   3295  HG  CYS A 208      66.909 -40.955  -0.606  1.00  0.00           H
ATOM   3296  N   GLU A 209      70.157 -43.317  -2.676  1.00  0.00           N
ATOM   3297  CA  GLU A 209      70.867 -44.351  -3.424  1.00  0.00           C
ATOM   3298  C   GLU A 209      69.953 -45.518  -3.782  1.00  0.00           C
ATOM   3299  O   GLU A 209      69.315 -45.513  -4.836  1.00  0.00           O
ATOM   3300  CB  GLU A 209      72.092 -44.830  -2.644  1.00  0.00           C
ATOM   3301  CG  GLU A 209      73.268 -43.876  -2.744  1.00  0.00           C
ATOM   3302  CD  GLU A 209      74.251 -44.028  -1.610  1.00  0.00           C
ATOM   3303  OE1 GLU A 209      73.932 -44.748  -0.641  1.00  0.00           O
ATOM   3304  OE2 GLU A 209      75.340 -43.423  -1.684  1.00  0.00           O
ATOM   3305  HA  GLU A 209      71.219 -43.938  -4.371  1.00  0.00           H
ATOM   3306  HB2 GLU A 209      71.767 -44.972  -1.613  1.00  0.00           H
ATOM   3307  HB3 GLU A 209      72.410 -45.798  -3.034  1.00  0.00           H
ATOM   3308  HG2 GLU A 209      73.757 -43.988  -3.715  1.00  0.00           H
ATOM   3309  HG3 GLU A 209      72.996 -42.858  -2.596  1.00  0.00           H
ATOM   3310  H   GLU A 209      69.421 -43.583  -2.038  1.00  0.00           H
TER    3311      GLU A 209
HETATM 3312  O   HOH A 210      74.312 -20.545   6.438  1.00  0.00           O
HETATM 3313  H1  HOH A 210      73.831 -21.189   5.870  1.00  0.00           H
HETATM 3314  H2  HOH A 210      73.864 -20.683   7.299  1.00  0.00           H
ENDMDL
CONECT 3313 3312
CONECT 3314 3312
CONECT 3312 3313 3314
MODEL        2
HETATM    1  C1  0       1      67.328 -21.263  20.337  1.00  0.00           C
HETATM    2  C2  0       1      66.611 -20.941  19.135  1.00  0.00           C
HETATM    3  C3  0       1      67.579 -20.506  18.184  1.00  0.00           C
HETATM    4  N4  0       1      68.853 -20.551  18.759  1.00  0.00           N
HETATM    5  C5  0       1      68.705 -21.011  20.073  1.00  0.00           C
HETATM    6  C6  0       1      69.676 -21.229  21.074  1.00  0.00           C
HETATM    7  C7  0       1      69.291 -21.702  22.342  1.00  0.00           C
HETATM    8  C8  0       1      67.935 -21.958  22.614  1.00  0.00           C
HETATM    9  C9  0       1      66.964 -21.739  21.618  1.00  0.00           C
HETATM   10  C10 0       1      65.251 -20.969  18.747  1.00  0.00           C
HETATM   11  C11 0       1      64.858 -20.576  17.454  1.00  0.00           C
HETATM   12  C12 0       1      65.824 -20.148  16.524  1.00  0.00           C
HETATM   13  C13 0       1      67.182 -20.113  16.889  1.00  0.00           C
HETATM   14 Cl14 0       1      67.461 -22.538  24.168  1.00  0.00          Cl
HETATM   15 Cl15 0       1      63.192 -20.620  17.008  1.00  0.00          Cl
HETATM   16  C16 0       1      70.102 -20.186  18.106  1.00  0.00           C
HETATM   17  C17 0       1      70.806 -21.395  17.448  1.00  0.00           C
HETATM   18  O18 0       1      69.859 -22.082  16.651  1.00  0.00           O
HETATM   19  C19 0       1      71.999 -20.984  16.551  1.00  0.00           C
HETATM   20  N20 0       1      71.659 -19.964  15.547  1.00  0.00           N
HETATM   21  C21 0       1      70.889 -20.506  14.417  1.00  0.00           C
HETATM   22  C22 0       1      71.748 -21.368  13.461  1.00  0.00           C
HETATM   23  N23 0       1      72.902 -20.620  12.947  1.00  0.00           N
HETATM   24  C24 0       1      73.693 -20.114  14.075  1.00  0.00           C
HETATM   25  C25 0       1      72.837 -19.251  15.032  1.00  0.00           C
HETATM   26  C26 0       1      73.717 -21.441  12.039  1.00  0.00           C
HETATM   27  C27 0       1      72.966 -22.662  11.539  1.00  0.00           C
HETATM   28  C28 0       1      72.565 -23.664  12.448  1.00  0.00           C
HETATM   29  C29 0       1      71.864 -24.797  11.989  1.00  0.00           C
HETATM   30  C30 0       1      71.565 -24.933  10.620  1.00  0.00           C
HETATM   31  C31 0       1      71.967 -23.937   9.709  1.00  0.00           C
HETATM   32  C32 0       1      72.667 -22.804  10.167  1.00  0.00           C
HETATM   33  H33 0       1      70.718 -21.031  20.876  1.00  0.00           H
HETATM   34  H34 0       1      70.037 -21.867  23.105  1.00  0.00           H
HETATM   35  H35 0       1      65.924 -21.936  21.835  1.00  0.00           H
HETATM   36  H36 0       1      64.504 -21.296  19.456  1.00  0.00           H
HETATM   37  H37 0       1      65.523 -19.847  15.531  1.00  0.00           H
HETATM   38  H38 0       1      67.915 -19.785  16.170  1.00  0.00           H
HETATM   39  H39 0       1      70.745 -19.716  18.849  1.00  0.00           H
HETATM   40  H40 0       1      69.899 -19.415  17.363  1.00  0.00           H
HETATM   41  H41 0       1      71.135 -22.096  18.217  1.00  0.00           H
HETATM   42  H42 0       1      69.569 -21.514  15.952  1.00  0.00           H
HETATM   43  H43 0       1      72.458 -21.859  16.089  1.00  0.00           H
HETATM   44  H44 0       1      72.778 -20.554  17.183  1.00  0.00           H
HETATM   45  H45 0       1      70.071 -21.118  14.799  1.00  0.00           H
HETATM   46  H46 0       1      70.415 -19.697  13.861  1.00  0.00           H
HETATM   47  H47 0       1      72.090 -22.254  13.996  1.00  0.00           H
HETATM   48  H48 0       1      71.135 -21.735  12.638  1.00  0.00           H
HETATM   49  H49 0       1      74.146 -20.941  14.623  1.00  0.00           H
HETATM   50  H50 0       1      74.523 -19.512  13.704  1.00  0.00           H
HETATM   51  H51 0       1      72.532 -18.333  14.530  1.00  0.00           H
HETATM   52  H52 0       1      73.460 -18.934  15.868  1.00  0.00           H
HETATM   53  H53 0       1      74.066 -20.838  11.198  1.00  0.00           H
HETATM   54  H54 0       1      74.610 -21.791  12.560  1.00  0.00           H
HETATM   55  H55 0       1      72.792 -23.569  13.500  1.00  0.00           H
HETATM   56  H56 0       1      71.558 -25.562  12.687  1.00  0.00           H
HETATM   57  H57 0       1      71.028 -25.802  10.268  1.00  0.00           H
HETATM   58  H58 0       1      71.738 -24.043   8.658  1.00  0.00           H
HETATM   59  H59 0       1      72.972 -22.045   9.461  1.00  0.00           H
HETATM   60  H60 0       1      71.077 -19.306  16.045  1.00  0.00           H
HETATM   61  H61 0       1      72.569 -19.837  12.404  1.00  0.00           H
ENDMDL
CONECT    1    2    5    9
CONECT   10    2   11   36
CONECT   11   10   12   15
CONECT   12   11   13   37
CONECT   13    3   12   38
CONECT   16    4   17   39   40
CONECT   17   18   16   19   41
CONECT   19   17   20   43   44
CONECT    2    3    1   10
CONECT   21   46   45   20   22
CONECT   22   48   47   21   23
CONECT   24   49   50   23   25
CONECT   25   52   51   20   24
CONECT   26   53   54   23   27
CONECT   27   26   28   32
CONECT   28   55   27   29
CONECT   29   56   28   30
CONECT    3    4    2   13
CONECT   30   57   29   31
CONECT   31   58   30   32
CONECT   32   59   27   31
CONECT    5    4    6    1
CONECT    6    5    7   33
CONECT    7    6    8   34
CONECT    8    7    9   14
CONECT    9    1    8   35
CONECT   14    8
CONECT   15   11
CONECT   33    6
CONECT   34    7
CONECT   35    9
CONECT   36   10
CONECT   37   12
CONECT   38   13
CONECT   39   16
CONECT   40   16
CONECT   41   17
CONECT   42   18
CONECT   43   19
CONECT   44   19
CONECT   45   21
CONECT   46   21
CONECT   47   22
CONECT   48   22
CONECT   49   24
CONECT   50   24
CONECT   51   25
CONECT   52   25
CONECT   53   26
CONECT   54   26
CONECT   55   28
CONECT   56   29
CONECT   57   30
CONECT   58   31
CONECT   59   32
CONECT   60   20
CONECT   61   23
CONECT   20   60   19   21   25
CONECT   23   61   22   24   26
CONECT    4    3    5   16
CONECT   18   17   42
END
